# Supplementary material for: Factors associated with self-reported health among New Zealand military veterans: a cross-sectional study
Source: PubMed Central journal article supplement — BMJ Open. 2022 May 25;12(5):e056916. doi: 10.1136/bmjopen-2021-056916 (PMC9134175; doi:10.1136/bmjopen-2021-056916), 2022-05-25
Supplement: bmjopen-2021-056916.draft_revisions.pdf [file bmjopen-2021-056916.draft_revisions.pdf]

# BMJ Open

BMJ Open is committed to open peer review. As part of this commitment we make the peer review history of every article we publish publicly available.

When an article is published we post the peer reviewers' comments and the authors' responses online. We also post the versions of the paper that were used during peer review. These are the versions that the peer review comments apply to.

The versions of the paper that follow are the versions that were submitted during the peer review process. They are not the versions of record or the final published versions. They should not be cited or distributed as the published version of this manuscript.

BMJ Open is an open access journal and the full, final, typeset and author-corrected version of record of the manuscript is available on our site with no access controls, subscription charges or pay-per-view fees (<http://bmjopen.bmj.com>).

If you have any questions on BMJ Open's open peer review process please email [info.bmjopen@bmj.com](mailto:info.bmjopen@bmj.com)

# BMJ Open

## Factors associated with self-reported health among New Zealand military Veterans: A cross-sectional study

|                               |                                                                                                                                                                                                                                                                                                                                                                                                                                                                                                                                                                                                                                                                                                                                        |
|-------------------------------|----------------------------------------------------------------------------------------------------------------------------------------------------------------------------------------------------------------------------------------------------------------------------------------------------------------------------------------------------------------------------------------------------------------------------------------------------------------------------------------------------------------------------------------------------------------------------------------------------------------------------------------------------------------------------------------------------------------------------------------|
| Journal:                      | <i>BMJ Open</i>                                                                                                                                                                                                                                                                                                                                                                                                                                                                                                                                                                                                                                                                                                                        |
| Manuscript ID                 | bmjopen-2021-056916                                                                                                                                                                                                                                                                                                                                                                                                                                                                                                                                                                                                                                                                                                                    |
| Article Type:                 | Original research                                                                                                                                                                                                                                                                                                                                                                                                                                                                                                                                                                                                                                                                                                                      |
| Date Submitted by the Author: | 30-Aug-2021                                                                                                                                                                                                                                                                                                                                                                                                                                                                                                                                                                                                                                                                                                                            |
| Complete List of Authors:     | McBride, David; University of Otago Dunedin School of Medicine, Department of Preventive and Social Medicine<br>Samaranayaka, Ariyapala; University of Otago Division of Health Sciences, Biostatistics Centre<br>Richardson, Amy; University of Otago Dunedin School of Medicine, Preventive and Social Medicine<br>Gardner, D; Massey University, Department of Psychology<br>Shepherd, Daniel; Auckland University of Technology, Health Sciences<br>Wyeth, Emma; University of Otago, Ngāi Tahu Māori Health Research Unit<br>de Graaf, Brandon; University of Otago Dunedin School of Medicine, Injury Prevention Research Unit<br>Derrett, Sarah; University of Otago Dunedin School of Medicine, Preventive and Social Medicine |
| Keywords:                     | OCCUPATIONAL & INDUSTRIAL MEDICINE, EPIDEMIOLOGY, Risk management < HEALTH SERVICES ADMINISTRATION & MANAGEMENT                                                                                                                                                                                                                                                                                                                                                                                                                                                                                                                                                                                                                        |
|                               |                                                                                                                                                                                                                                                                                                                                                                                                                                                                                                                                                                                                                                                                                                                                        |

SCHOLARONE™  
Manuscripts

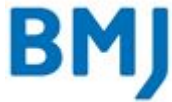

I, the Submitting Author has the right to grant and does grant on behalf of all authors of the Work (as defined in the below author licence), an exclusive licence and/or a non-exclusive licence for contributions from authors who are: i) UK Crown employees; ii) where BMJ has agreed a CC-BY licence shall apply, and/or iii) in accordance with the terms applicable for US Federal Government officers or employees acting as part of their official duties; on a worldwide, perpetual, irrevocable, royalty-free basis to BMJ Publishing Group Ltd ("BMJ") its licensees and where the relevant Journal is co-owned by BMJ to the co-owners of the Journal, to publish the Work in this journal and any other BMJ products and to exploit all rights, as set out in our [licence](#).

The Submitting Author accepts and understands that any supply made under these terms is made by BMJ to the Submitting Author unless you are acting as an employee on behalf of your employer or a postgraduate student of an affiliated institution which is paying any applicable article publishing charge ("APC") for Open Access articles. Where the Submitting Author wishes to make the Work available on an Open Access basis (and intends to pay the relevant APC), the terms of reuse of such Open Access shall be governed by a Creative Commons licence – details of these licences and which [Creative Commons](#) licence will apply to this Work are set out in our licence referred to above.

Other than as permitted in any relevant BMJ Author's Self Archiving Policies, I confirm this Work has not been accepted for publication elsewhere, is not being considered for publication elsewhere and does not duplicate material already published. I confirm all authors consent to publication of this Work and authorise the granting of this licence.

1  
2  
3 **FACTORS ASSOCIATED WITH SELF-REPORTED HEALTH AMONG NEW ZEALAND MILITARY**  
4 **VETERANS: A CROSS-SECTIONAL STUDY**  
5

6 David McBride,<sup>1</sup> Ari Samaranayaka<sup>2</sup>, Amy Richardson,<sup>1</sup> Dianne Gardner,<sup>3</sup> Daniel Shepherd,<sup>4</sup>  
7  
8 Emma H. Wyeth<sup>5</sup>, Brandon deGraaf,<sup>6</sup> Sarah Derrett.<sup>1</sup>  
9

10 <sup>1</sup>Department of Preventive and Social Medicine, Dunedin School of Medicine, University of  
11 Otago, New Zealand.

12 <sup>2</sup>Biostatistics Centre, Division of Health Sciences, University of Otago, Dunedin, New Zealand.

13 <sup>3</sup>School of Psychology, Massey University, New Zealand.

14 <sup>4</sup>Department of Psychology, Auckland University of Technology, New Zealand.

15 <sup>5</sup>Ngāi Tahu Māori Health Research Unit, Department of Preventive and Social Medicine,  
16 Dunedin School of Medicine, University of Otago, New Zealand.

17 <sup>6</sup>Injury Prevention Research Unit, Department of Preventive and Social Medicine, Dunedin  
18 School of Medicine, University of Otago, New Zealand.

19 **Keywords:**

20 Military Medicine

21 Quality of Life

22 Risk Factors

23 Protective Factors

24 Point Prevalence

25 **Word count**

26 2959

27 **Corresponding Author:**

28 David McBride, Department of Preventive and Social Medicine, Adams Building, 18 Frederick  
29 Street, Dunedin 9017, New Zealand.

30 Email: [david.mcbride@otago.ac.nz](mailto:david.mcbride@otago.ac.nz)

31 Phone: +64 3 479 7208

32 Fax: +64 3 479 7298

## 1 **ABSTRACT**

### 2 **Objective**

3 To identify factors associated with better or poorer self-reported health status in New Zealand  
4 military Veterans.

### 5 **Design**

6 An online cross-sectional survey.

### 7 **Participants**

8 The total number of eligible Veterans is unknown, but a total of 1,817 Veterans responded,  
9 including 1009 serving personnel, providing a 26% response rate from that group.

### 10 **Study variables**

11 Health status was self-reported using the EQ-5D-5L, which asks about problems across five  
12 dimensions (mobility, self-care, usual activities, pain or discomfort, and anxiety or  
13 depression), with five levels of severity (e.g. no, slight, moderate, severe or extreme  
14 problems). The EQ-5D-5L also contains a visual analogue scale (EQ-VAS), scaled from 0 (worst)  
15 to 100 (best) imagined health. Hypothetical relationships with better health were positive  
16 social support, sleep and psychological flexibility; with poorer health, exposure to  
17 psychological trauma, distress and hazardous drinking.

### 18 **Results:**

19 The proportion of Veterans reporting 'any problems' compared to 'no problems' with the five  
20 EQ-5D dimensions, was similar to those found in the general NZ population, although a higher  
21 proportion of Veterans reported problems with mobility, self-care, usual activities and pain or  
22 discomfort. Psychological flexibility and better sleep quality were associated with higher EQ-  
23 VAS scores; distress was associated with lower EQ-VAS scores.

### 24 **Conclusion:**

25 In this sample of New Zealand Veterans, psychological flexibility and good sleep are associated  
26 with better self-rated health, and distress and poor sleep with diminished health. These  
27 factors might be used as sentinel health indicators in assessing Veteran health status. As  
28 distress, psychological flexibility and sleep are closely related, cognitive behavioural therapy  
29 encompassing these domains may be useful in improving the health of New Zealand Veterans.

### 30 **Keywords:**

31 Self-rated health, EQ-5D, Veterans, deployment, military, risk factors.

### 32 **Strengths and limitations of this study**

- 33 • Many studies of Veterans have focused on adverse outcomes, but we have been able  
34 to focus on a holistic measure of 'health'.

- 35 • The study was sufficiently powered to detect important relationships indicating  
36 opportunities for intervention.
- 37 • The exact response rate is unknown, and possible bias may be a limitation.
- 38 • The cross-sectional design means that we cannot explore cause and effect  
39 relationships.

## 40 INTRODUCTION

41 The three major events in the military life course are entry to military service, deployment on  
42 active service and transition back to civilian life. On entry, soldiers, sailors and air personnel  
43 are subject to a selection process to ensure, as far as possible, good physical and mental  
44 health, giving rise to the 'healthy soldier effect', with service personnel being, on average,  
45 healthier than the general population.[1] However, the physical and psychological stressors  
46 of military service have been found to erode this effect.[2]

47 The physical stressors have a particular impact on the lower limb, with load carriage, high  
48 intensity training and the design of footwear being implicated in injury causation.[3] A military  
49 career increases opportunities for psychological trauma, and post-traumatic stress disorder  
50 (PTSD) has been identified as the 'signature injury' of United States service men and women  
51 deployed to Afghanistan and Iraq.[4]

52 A focus on adverse health events in the literature[5] means that wellbeing is relatively  
53 overlooked. In the long run, military service has been found to have positive effects.[6,7] Good  
54 health after service does, however, depend on the success of the 'military civilian transition',  
55 a complex process for which models have been developed.[8] Health problems developed in  
56 service, difficulty in assuming a post-service identity and many other factors contribute to  
57 health and wellbeing outcomes.[8] In New Zealand, military Veterans can only access  
58 assistance from New Zealand Veteran's Affairs (NZVA) if they have undertaken 'qualifying  
59 operational service' as defined by the Veteran Support Act 2014,[9] and are Veterans in a legal  
60 sense. NZVA support some 12,000 Veterans, with an average age of 80 years, 5000 being  
61 actively case managed.[10] The majority will have seen operational service in Korea, Borneo,  
62 Malaya and Vietnam. Post-Vietnam, smaller numbers deployed on United Nations and other  
63 missions, but the tempo of operations rose with the deployment to Bosnia in 1992, and some  
64 9,000-10,000 'legal' Veterans deployed between then and the withdrawal of New Zealand  
65 troops from Afghanistan in 2021. The Ministerial Veteran's Health Advisory Panel, established

1  
2 66 under the Veteran Support Act, are specifically charged with funding research on this  
3  
4 67 'contemporary Veteran' group.

5  
6 68 The aims of this study were to describe self-reported health among these younger Veterans,  
7  
8 69 and identify factors associated with better or poorer health.

## 9 70 **Veteran and public involvement**

10 71 The Ministerial Veterans Health Advisory Panel, who fund research into contemporary  
11  
12 72 Veterans health,[10] commissioned the study and advised on the design. We also formed a  
13  
14 73 steering group with representatives from the New Zealand Defence Force, New Zealand  
15  
16 74 Veterans Affairs, the Royal New Zealand Returned and Services Association (RSA)[11] and No  
17  
18 75 Duff,[12] a charity providing first response support to Veterans and their families. We also  
19  
20 76 consulted with the Ngāi Tahu Research Consultation Committee in order to assess the  
21  
22 77 importance of the project to Māori, New Zealand's indigenous population. We undertook to  
23  
24 78 inform the Veteran community before releasing the results, also to give all Veterans, defined  
25  
26 79 as anyone who had served in the military, an opportunity to participate.

## 27 28 80 **METHODS**

### 29 30 81 **Participants**

31 82 Data were collected via an online survey, a postal version was also available on request. There  
32  
33 83 is no comprehensive Veteran registry, however In June 2018, a link to the online questionnaire  
34  
35 84 was sent by email to all currently serving regular and reserve New Zealand Defence Force  
36  
37 85 (NZDF) members registered on the NZDF email system who were 'legal Veterans', as indicated  
38  
39 86 by holding the New Zealand Operational Service Medal, numbering 3,874 personnel at that  
40  
41 87 time. An introductory message and link to the questionnaire were also presented on the NZDF  
42  
43 88 'intranet landing page', a secure internal webpage from which all regular force personnel can  
44  
45 89 access relevant work-related content, tools, and resources. Retired military personnel were  
46  
47 90 invited to participate through posters distributed to reserve units and the 43 local social clubs  
48  
49 91 identified by the RSA national office to be 'Veteran active.' Paper questionnaires with return  
50  
51 92 postage envelopes were made available at these sites. Announcements were also made on  
52  
53 93 military social media pages, and both retired and currently serving personnel were invited to  
54  
55 94 participate through an announcement on the No Duff website. The questionnaire was  
56  
57 95 available for completion from June to December 2018. Ethics approval for the study was  
58  
59 96 obtained from the Northern B Health and Disability Ethics Committee, reference 17NTB118.  
60  
60 97

1  
2 98 **Questionnaire**  
3

4 99 *Criterion variable*  
5

6 100 Self-rated health status was assessed using the EQ-5D-5L,[13] a short questionnaire asking  
7  
8 101 about the respondent's health across five dimensions: mobility, self-care, usual activities, pain  
9  
10 102 or discomfort and anxiety or depression, with response options ranging from (e.g.) 'no  
11  
12 103 problems', to 'extreme problems'. For each dimension, participants were categorised as  
13  
14 104 having 'any problems' if they selected any response other than 'no problems'.

15 105 Additionally, the EQ-5D-5L visual analogue scale (EQ-VAS) asks the respondent to mark on a  
16  
17 106 vertical visual analogue scale (VAS) how good or bad their health is today, where the  
18  
19 107 endpoints are labelled 'the best health you can imagine' (score of 100) and 'the worst health  
20  
21 108 you can imagine' (score of 0).

22 109 *Independent variables*  
23

24 110 Demographic characteristics included age, sex, ethnicity, service years, and past deployment  
25  
26 111 on operational service (yes/no). Ethnicity prioritisation was adopted,[14] whereby  
27  
28 112 participants with multiple responses were assigned to one of the categories, in the order of  
29  
30 113 Māori, Pacific Peoples, Other and European.

31 114 General psychiatric morbidity was assessed using the 12-item General Health Questionnaire  
32  
33 115 (GHQ-12),[15] scored using a four point scale (0-3) and summing the 12 items to give a total  
34  
35 116 score, with higher scores indicating elevated distress.

36  
37 117 Social support was measured using the Social Provisions Scale,[16] with responses made on a  
38  
39 118 four-point Likert-type scale ranging from 1 'strongly disagree' to 4 'strongly agree'. The 24  
40  
41 119 items can be reduced to six subscales (attachment, social integration, reassurance of worth,  
42  
43 120 reliable alliance, social guidance, opportunity for nurturance) or summed to create a total  
44  
45 121 score, with greater scores indicating greater social support.

46 122 Alcohol use was measured using the AUDIT-C,[17] scaled from 0-12. A score of 3+ for women  
47  
48 123 and 4+ for men indicated potentially hazardous drinking behaviour.

49  
50 124 Sleep quality was assessed with the Sleep Condition Indicator (SCI), [18] assessing insomnia as  
51  
52 125 described in the Diagnostic and Statistical Manual of Mental Disorders version 5 (DSM-V).[19]  
53  
54 126 The SCI consists of eight items rated from 0-4, the total scores being scaled to a range of 0 to  
55  
56 127 10, where higher scores represent better sleep.

57 128 Trauma exposure was assessed with the Brief Trauma Scale (BTS),[20] which captures past  
58  
59 129 exposure to situations that were life threatening or capable of producing serious injury.  
60



1  
2 130 Psychological flexibility was measured with the 10-item AAQ-II, designed as a measure of  
3  
4 131 effectiveness in a particular mode of behavioural intervention, Action and Commitment  
5  
6 132 Therapy (ACT).[21] Items were answered on a 7-point scale, with options ranging from 'never  
7  
8 133 true' to 'always true'. The items were summed to obtain a total score (possible range 10 to  
9  
10 134 70), with higher scores indicative of greater psychological flexibility.

### 11 135 **Statistical analyses**

12  
13 136 With respect to the calculation of summed scores, if only one item was missing for a particular  
14  
15 137 measure then this was imputed with the mean of the remaining items; if more than one item  
16  
17 138 was missing then the score was set to missing for that participant. Complete case analysis was  
18  
19 139 used in the remaining analyses. The five dimensions of the EQ-5D-5L were compared to the  
20  
21 140 NZ population normative values.[22]

22  
23 141 Univariate ordinary least-squares linear regression analyses assessed the strength of  
24  
25 142 relationships between each independent variable and EQ-VAS scores, using robust standard  
26  
27 143 errors to account for heteroscedasticity and calculating 95% confidence intervals (95% CIs).  
28  
29 144 Multivariable linear regression was then used to identify the role of the independent variables  
30  
31 145 while adjusting for each other. None of the social support sub-scales were used in this  
32  
33 146 multivariable model, instead using the social support total score. The model was built using  
34  
35 147 backward variable selection with  $p < 0.10$  for variable retention, with the exceptions of age,  
36  
37 148 sex, service years, and deployment status which were retained as adjusting variables  
38  
39 149 irrespective of p-values.

## 40 150 **RESULTS**

41  
42 151 When the survey went online, invitations were emailed to the 3784 serving Veterans in the  
43  
44 152 NZDF, resulting in 1009 responses, 26% of that group, added to by 449 retired and 288 non-  
45  
46 153 deployed Veterans, a total of 1817, 90 of whom completed a paper questionnaire. A total of  
47  
48 154 1767 (97%) completed the EQ-VAS and were thus included in all the analyses.

49 155 A supplementary table presents the EQ-VAS score according to the sample characteristics.

50  
51 156 Figure 1 shows the proportion of EQ-5D-5L dimension responses reporting 'any problem'  
52  
53 157 severity level other than 'no problems' in comparison to the New Zealand population  
54  
55 158 normative values.[22]

### 56 159 **Figure 1 about here**

57  
58 160 The results of the univariate analysis are displayed in Table 1. Here, for continuous  
59  
60 161 characteristics, the regression coefficient ( $\beta$ ) represents the change in the mean EQ-VAS

162 associated with one unit increase in the characteristic. For categorical characteristics,  $\beta$  is the  
 163 change in mean EQ-VAS scores compared to the referent category.

164 **Table 1: Univariate cross-sectional associations between variables and mean EQ-VAS scores**  
 165 **for New Zealand Veterans (N=1,762)**

| Characteristic                      | <i>n</i> | $\beta$   | 95% CIs        | <i>p</i> -value |
|-------------------------------------|----------|-----------|----------------|-----------------|
| <b>Age*</b>                         | 1762     | -0.19     | [-0.24, -0.13] | <.01            |
| <b>Sex</b>                          |          |           |                |                 |
| Female                              | 220      | Reference | -              |                 |
| Male                                | 1520     | -0.65     | [-3.04, 1.73]  | .59             |
| <b>Ethnicity</b>                    |          |           |                |                 |
| NZ European                         | 1382     | Reference | -              |                 |
| Māori                               | 245      | 1.21      | [-1.00, 3.42]  |                 |
| Other                               | 140      | -2.95     | [-6.26, 0.36]  | 0.10            |
| <b>Service years*</b>               | 1670     | 0.19      | [0.11, 0.27]   | <.01            |
| <b>Deployment status</b>            |          |           |                |                 |
| Not deployed                        | 288      | Reference | -              |                 |
| Deployed                            | 1458     | 5.80      | [ 3.35, 8.25 ] | <.01            |
| <b>GHQ-12 score*</b>                | 1765     | -1.63     | [-1.79, -1.47] | <.01            |
| <b>Social support*</b>              |          |           |                |                 |
| Attachment                          | 1760     | 2.02      | [ 1.69, 2.34 ] | <.01            |
| Social integration                  | 1758     | 2.45      | [ 2.06, 2.88 ] | <.01            |
| Reassurance of worth                | 1756     | 2.48      | [ 2.11, 2.85 ] | <.01            |
| Reliable alliance                   | 1760     | 2.30      | [ 1.91, 2.70 ] | <.01            |
| Social guidance                     | 1760     | 2.00      | [ 1.65, 2.35 ] | <.01            |
| Opportunity for nurturance          | 1758     | 0.85      | [ 0.47, 1.23 ] | <.01            |
| Social support total score          | 1753     | 0.52      | [ 0.44, 0.59 ] | <.01            |
| <b>Psychological flexibility*</b>   | 1750     | 0.79      | [ 0.71, 0.87 ] | <.01            |
| <b>Sleep score*</b>                 | 1747     | 3.47      | [ 3.11, 3.83 ] | <.01            |
| <b>AUDIT-C</b>                      |          |           |                |                 |
| Non-hazardous                       |          | Reference | -              |                 |
| Hazardous                           |          | 0.62      | [-1.03, 2.26]  | 0.46            |
| <b>Exposure to traumatic events</b> |          |           |                |                 |
| Not exposed                         |          | Reference | -              |                 |
| Exposed                             |          | -5.72     | [-7.34, -4.11] | <.01            |

166 \*Scored as continuous variables, coefficient is per unit increase.

167 Of the demographic variables, age was associated with lower EQ-VAS scores, length of  
 168 service with higher scores. No relationships were apparent for sex or ethnicity. Positive  
 169 coefficients, indicating better health with presence of the characteristic, were present for  
 170 dichotomous variables of deployment, where the mean EQ-VAS score for deployed Veterans  
 171 was 5.8 VAS units higher (better) than for non-deployed. The largest negative associations

1  
2 172 were for exposure to traumatic events, with a mean EQ-VAS score 5.7, lower for those  
3  
4 173 exposed compared to those not exposed. Distress, as measured by the GHQ-12, had a  
5  
6 174 negative association with health state. Positive associations with health state were found for  
7  
8 175 psychological flexibility as measured by the AAQ-II, better sleep scores, and most of the  
9  
10 176 dimensions of social support, barring 'opportunity for nurturance'.  
11  
12 177 Table 2 shows the results from two models. The first model is adjusted for the other  
13  
14 178 characteristics, with 11 variables and 1,557 people providing valid responses for all factors  
15  
16 179 included in the model. All effect sizes were reduced, and the social support and AUDIT-C  
17  
18 180 scores were no longer associated, with 11 variables explaining 35% of the variability in the  
19  
20 181 EQ-VAS.  
21  
22 182 The final model involved backward variable selection setting a p-value of 0.10, identifying a  
23  
24 183 smaller subset of variables. Age, sex, service years, and deployment status were retained in  
25  
26 184 the model irrespective of their p-values, thus adjusting for those variables, using 1,600  
27  
28 185 complete responses. Social support and AUDIT-C hazardous drinking were not retained in this  
29  
30 186 final model; other coefficients remaining essentially the same, with a minimal effect on the  
31  
32 187 overall  $R^2$ .  
33  
34  
35  
36  
37  
38  
39  
40  
41  
42  
43  
44  
45  
46  
47  
48  
49  
50  
51  
52  
53  
54  
55  
56  
57  
58  
59  
60

188 **Table 2. Multivariable models of associations between variables and mean EQ-VAS scores**  
 189 **for New Zealand Veterans**

| Characteristic                                  | Adjusted model, N used =1,557 |                |              | Final model, N used =1,600 |                |              |
|-------------------------------------------------|-------------------------------|----------------|--------------|----------------------------|----------------|--------------|
|                                                 | $\beta$                       | 95% CI         | p-value      | $\beta$                    | 95% CI         | p-value      |
| <b>Age (years)*</b>                             | 0.17                          | [-0.23, 1.11]  | <0.01        | -0.17                      | [-0.23, -0.12] | <0.01        |
| <b>Sex</b>                                      |                               |                |              |                            |                |              |
| Female                                          | Ref                           | -              | -            | Ref                        | -              | -            |
| Male                                            | 0.24                          | [-2.52, 2.03]  | 0.84         | -0.60                      | [-2.82, 1.63]  | 0.60         |
| <b>Ethnicity</b>                                |                               |                |              |                            |                |              |
| NZ European                                     | Ref                           | -              | -            | Ref                        | -              | -            |
| Māori                                           | 0.29                          | [-1.70, 2.27]  | 0.07         | 0.19                       | [-1.77, 2.14]  |              |
| Other                                           | -3.58                         | [-6.66, -0.51] |              | -2.91                      | [-5.88, 0.06]  | 0.15         |
| <b>Service years*</b>                           | 0.17                          | [ 0.10, 0.25]  | <0.01        | 0.17                       | [ 0.10, 0.25]  | <0.01        |
| <b>Deployment status</b>                        |                               |                |              |                            |                |              |
| Not deployed                                    | Ref                           |                |              | Ref                        | -              |              |
| Deployed                                        | 2.91                          | [ 0.64, 5.18]  | <0.05        | 2.90                       | [0.65, 5.15]   | 0.01         |
| <b>GHQ12 score*</b>                             | -0.87                         | [-1.09, -0.65] | <0.01        | -0.92                      | [-1.13, -0.71] | <0.01        |
| <b>Social support (SPS score)*</b>              | 0.01                          | [-0.07, 0.10]  | 0.76         | -                          | -              | -            |
| <b>Psychological flexibility score (AAQii)*</b> | 0.26                          | [ 0.15, 0.37]  | <0.01        | 0.24                       | [0.14, 0.35]   | <0.01        |
| <b>Sleep score (SCI), Range 0-10*</b>           | 1.60                          | [ 1.18, 2.02]  | <0.01        | 1.63                       | [1.22, 2.05]   | <0.01        |
| <b>AUDIT_C score</b>                            |                               |                |              |                            |                |              |
| Non hazardous                                   | Ref                           |                |              | -                          | -              | -            |
| Hazardous                                       | 0.41                          | [-1.00, 1.81]  | 0.57         | -                          | -              | -            |
| <b>Exposure to traumatic events (BTQ)</b>       |                               |                |              |                            |                |              |
| Not exposed                                     | Ref                           |                |              | Ref                        | -              | -            |
| Exposed                                         | -1.77                         | [-3.30, -0.24] | <0.05        | -1.81                      | [-3.32, 0.30]  | 0.02         |
|                                                 |                               |                | $R^2 = 0.35$ |                            |                | $R^2 = 0.36$ |

190 \*Scored as continuous variables, coefficient is per unit increase.

## 191 DISCUSSION

### 192 *Principal findings*

193 In general, Veterans had a similar proportion of 'any problem' responses in the EQ-5D  
 194 dimensions as the general population of New Zealand, with evidence of more problems in the  
 195 physical domains of mobility, usual activities and pain or discomfort, but no difference in the  
 196 psychological domain.

197 Mutual adjustment, with 11 variables in the model, reduced all the effect sizes and explained  
 198 35% of the variance, thus leaving 65% which cannot be explained. The final model had 9  
 199 variables, explaining 36% of the variance. The results make conceptual sense in that distress  
 200 is associated with reduced EQ-VAS, while psychological flexibility is associated with a modest  
 201 protective effect. Surprisingly, social support was not identified as an associated factor,  
 202 however we may not have measured some support domains valued by Veterans. There are

203 known to be many other influences on health, including 'social wellbeing',[5] financial status,  
204 personality and non-deployment related stressors,[23] which we have not measured.

### 205 *Strengths and weaknesses*

206 Strengths of our study were the relatively large sample size, the inclusion of all Veterans, the  
207 assessment of 'health', infrequently investigated in Veteran populations, and the inclusion of  
208 New Zealand Veterans with a range of characteristics, including 'deployed' and 'non-  
209 deployed' Veterans. As a measure of health, the EQ-5D-5L dimensions and EQ-VAS ask about  
210 health on the day that respondents complete the questionnaire, the EQ-VAS end points being,  
211 respectively, the 'best' and 'worst' health they can imagine, so it is a holistic measure of health  
212 state.[24]

213 The response rate of 27% from serving Veterans, along with the unknown total number of  
214 Veterans, raises the question of bias, the direction of which is difficult to assess, as responses  
215 may be more likely from either Veterans with good or poor health. We do know that New  
216 Zealand Veterans tend to be stoic, so they might underestimate their health concerns.[25] There are  
217 also likely to be other personal characteristics that we have not measured. We were however  
218 able to adjust for deployment status, which did have a positive association with health state.  
219 The cross-sectional design also means that we cannot explore cause and effect, so  
220 recommendations for future interventions require additional support from longitudinal  
221 studies.

### 222 *Comparison with other studies*

223 We have previously reported factors associated with post-traumatic stress in this group,[26]  
224 using the Military Post Traumatic Stress Checklist (PCL-M). Factors associated with higher PCL-  
225 M scores were trauma exposure, older age, male gender, and being of Māori ethnicity. Factors  
226 associated with lower PCL-M scores were greater length of service, psychological flexibility,  
227 and better quality sleep. Using health as the outcome disclosed that Māori did not have poorer  
228 self-reported health compared to non-Māori, that deployment had a positive effect, and in  
229 the univariate models, all of the dimensions of social support were associated with improved  
230 health. The final model also included good sleep and psychological flexibility, providing most  
231 of the explanatory power in the model.

232 No other studies appear to have used the EQ-VAS as an outcome measure for Veteran health.  
233 Boehmer et al.[27] examined wellbeing among participants in the 2000 Behavioural Risk  
234 Factor Surveillance System describing health-related quality of life (HRQoL) by sex and military  
235 status, active duty, reservists Veterans, or no military service. Participants were asked to rate

1  
2 236 recent physical health, mental health, and activity limitation. Active duty men were more likely  
3  
4 237 than men without military service to report 14 or more days of activity limitation, pain, and  
5  
6 238 not enough rest in the past 30 days. Reserve personnel reported better overall HRQoL than  
7  
8 239 non-military participants, and no difference was observed between Veterans and persons  
9  
10 240 with no military service. There are also reports indicating that non-deployed personnel retain  
11  
12 241 better health than those who have been deployed.[28] Notably, the predominant reason for  
13  
14 242 medical discharge from the British Armed Forces was musculoskeletal problems.[29]  
15  
16 243 Diaz Santana et al.[30] carried out a cross-sectional survey of 60,000 U.S. Veterans of  
17  
18 244 Afghanistan and Iraq, with 20,563 responses. Mental quality of life scores were higher among  
19  
20 245 the non-deployed group compared to the deployed group, though the deployed group  
21  
22 246 reported higher physical quality of life scores compared to the non-deployed. Both mental  
23  
24 247 and physical quality of life were lower among Veterans compared to U.S. population norms.  
25  
26 248 Both positive and negative consequences of deployment have been described.[7,30] In a study  
27  
28 249 of Dutch Veterans,[7] two out of three reported a positive effect of deployment on their  
29  
30 250 quality of life at the time of the survey, this being related to positive feelings such as  
31  
32 251 satisfaction or comradeship, but a few having emotions such as frustration or shame. As  
33  
34 252 regards tangible effects,[31] negative consequences included the military 'chain of command',  
35  
36 253 being away from home, and deterioration of marital/significant other relationships. Positive  
37  
38 254 influences include improved financial security, self-improvement, and time to reflect.  
39  
40 255 Sleep difficulties are a common symptom for those with PTSD. McCarthy et al.[32] reported  
41  
42 256 on the 3,157 U.S. military Veterans enrolled in the National Health and Resilience in Veterans  
43  
44 257 Study, in which 27.6% reported poor sleep quality. Path analyses revealed significant  
45  
46 258 associations between poor sleep, severity of PTSD, poorer mental and physical health  
47  
48 259 functioning and lower overall quality of life.

49 260 Most Veterans do cope well with a military career, and service has a positive effect on  
50  
51 261 wellbeing. However, Oster et al.[5] emphasise that when things do not go well for Veterans,  
52  
53 262 their mental, physical and social health is interconnected, so their needs can be complex, and  
54  
55 263 management requires an integrated approach.

#### 53 264 *Future directions*

55 265 The results suggest that distress, psychological flexibility, and sleep have an important  
56  
57 266 relationship with self-rated health among Veterans in this study.  
58  
59 267 Reducing distress through the promotion of psychological flexibility might be possible,  
60  
268 although our finding here must be subject to caution as several researchers argue that the

1  
2 269 AAQ-II may be measuring psychological distress and affect rather than psychological  
3  
4 270 inflexibility.[33] Psychological flexibility is specifically targeted by ACT, a psychological  
5  
6 271 intervention described as being in the 'third wave' of behaviour change strategies.[34] The six  
7  
8 272 core processes of ACT (acceptance, cognitive defusion, being present, self as context, values,  
9  
10 273 and committed action) aim to increase psychological flexibility, the goal being "to have clients  
11  
12 274 experience the world more directly so that their behavior is more flexible and thus their  
13  
14 275 actions more consistent with the values that they hold." [34] Approaches such as ACT may  
15  
16 276 therefore improve health state in appropriate subjects. Lang et al. carried out a randomised  
17  
18 277 clinical trial (RCT), comparing ACT with person-centred therapy,[35] showing a general  
19  
20 278 improvement in symptoms of distress across both treatment arms, ACT providing superior  
21  
22 279 improvement in insomnia. The drop-out rate for both therapies was however high, and the  
23  
24 280 two groups did not exhibit any change in psychological flexibility. The authors proposed that  
25  
26 281 future studies should include additional measures of ACT processes to determine which are  
27  
28 282 actually affected by ACT.

283 Sleep in military personnel has been recognised as a 'vital health behaviour' for which policies  
284 and guidelines must be developed.[36] Cognitive behavioural therapy for insomnia (CBT-I) is  
285 regarded as an effective 'first line' treatment, and a brief intervention has been described for  
286 use in Australian general practice.[37] The Lang et al. trial[35] showed CBT-I to be effective,  
287 however future studies should include outcome measures that include ACT processes. Our  
288 final model showed that distress had a negative association with health, and psychological  
289 flexibility had a positive relationship, with sleep most likely related to both of these variables.  
290 It would seem important to screen for these conditions prior to transition from the military,  
291 as well as among retired Veterans, in order to provide targeted support. Further research is  
292 needed to examine the potential of ACT to improve Veterans' wellbeing.

293 Figure 1 Caption.

294 **The proportion of Veterans reporting 'any problem' with each of the EQ-5D-5L dimension**  
295 **scores compared to the NZ population normative proportions**

## 296 REFERENCES

- 297 1. McLaughlin R, Nielsen L, Waller M. An Evaluation of the Effect of Military Service on  
298 Mortality: Quantifying the Healthy Soldier Effect. *Ann Epidemiol.* 2008;18(2):928-936.
- 299 2. Bollinger MJ, Schmidt S, Pugh JA et al. Erosion of the healthy soldier effect in Veterans  
300 of US military service in Iraq and Afghanistan. *Popul Health Metr.* 2015;13:8.

- 301 3. Kimberley A. Andersen KA, Grimshaw PN et al. Musculoskeletal Lower Limb Injury Risk  
302 in Army Populations. *Sports Med-Open* 2016;2:22. DOI 10.1186/s40798-016-0046-z.
- 303 4. Hoge CW, Castro CA, Messer SC et al. Combat duty in Iraq and Afghanistan, mental  
304 health problems, and barriers to care. *N Engl J Med.* 2004;351(1):13–22.
- 305 5. Oster C, Morello A, Venning A et al. The health and wellbeing needs of Veterans: a  
306 rapid review. *BMC Psychiatry.* 2017;17(1):414.
- 307 6. Spiro A, 3rd, Settersten RA, Aldwin CM. Long-term Outcomes of Military Service in  
308 Aging and the Life Course: A Positive Re-envisioning. *Gerontologist.* 2016;56(1):5-13.
- 309 7. Duel J and Reijnen A. The long term effects of military deployment and their relation  
310 with the quality of life of Dutch Veterans. *Mil Behav Heal.* 2021;9(2):160-169.
- 311 8. Pedlar D, Thompson JM, Castro CA. Military Veteran reintegration. Military-to-civilian  
312 transition theories and frameworks. In: Castro C, Dursun S, editors. *Military Veteran  
313 reintegration, approach, management, and assessment of military Veterans  
314 transitioning to civilian life.* San Diego: Academic Press; 2019. 257p.
- 315 9. Veterans Support Act (NZ) 2014. [cited 2020 28 August] Available:  
316 <https://www.legislation.govt.nz/act/public/2014/0056/latest/whole.html>
- 317 10. New Zealand Government. Briefing to the Incoming Minister for Veterans. Wellington:  
318 New Zealand Veteran's Affairs; 2020. [cited 2020 28 August] Available from:  
319 <https://www.beehive.govt.nz/sites/default/files/2020-12/Veteran%20Affairs.pdf>
- 320 11. Royal New Zealand Returned and Services Association [internet]. [cited 2020 28  
321 August] Available: <https://www.rsa.org.nz/>
- 322 12. NoDuff. [Internet]. [cited 2020 28<sup>th</sup> August] <https://www.noduff.org/>
- 323 13. EuroQol Research Foundation. EQ-5D-5L User Guide [Internet]. Rotterdam: EuroQol  
324 Research Foundation; 2021. [cited 2020 28<sup>th</sup> August]. Available from:  
325 <https://euroqol.org/eq-5d-instruments/eq-5d-5l-about/>
- 326 14. Health Information Standards Organisation. Ethnicity data protocols. Wellington:  
327 Ministry of Health; 2017. Standard No.: HISO 10001:2017.
- 328 15. Goldberg D.P. The Detection of Psychiatric Illness by Questionnaire. Maudsley  
329 Monograph No. 21. London: Oxford University Press; 1972.
- 330 16. Barrera, M., Jr. and Ainlay, S.L. The structure of social support: a conceptual and  
331 empirical analysis. *J Comm Psychol.* 1983;11(2):133-43.
- 332 17. Bush K, Kivlahan DR, McDonnell MB et al. The AUDIT alcohol consumption questions  
333 (AUDIT-C): an effective brief screening test for problem drinking. *Ambulatory Care*



- 1  
2 334 Quality Improvement Project (ACQUIP). Alcohol Use Disorders Identification Test. Arch  
3  
4 335 Intern Med. 1998;158(16):1789-95.  
5  
6 336 18. Espie CA, Kyle SD, Hames P, Gardani M et al. The Sleep Condition Indicator: a clinical  
7  
8 337 screening tool to evaluate insomnia disorder. BMJ Open. 2014;4(3): e004183.  
9  
10 338 19. American Psychiatric Association. Diagnostic and Statistical Manual of Mental  
11  
12 339 Disorders (DSM-5). Fifth edition. Washington DC: American Psychiatric Association  
13  
14 340 2013. 991p.  
15  
16 341 20. Schnurr PP, Spiro A, Vielhauer MJ, et al. Trauma in the Lives of Older Men: Findings  
17  
18 342 from the Normative Aging Study. Journal of Clinical Geropsychology. 2002;8(3):175-  
19  
20 343 87.  
21  
22 344 21. Bond FW, Hayes SC, Baer RA et al. Preliminary psychometric properties of the  
23  
24 345 Acceptance and Action Questionnaire-II: a revised measure of psychological  
25  
26 346 inflexibility and experiential avoidance. Behav Therapy. 2011;42(4): 676-688.  
27  
28 347 22. Sullivan T, Hansen P, Ombler F, et al. (2020) A new tool for creating personal and social  
29  
30 348 EQ-5D-5L value sets, including valuing 'dead'. Soc Sci Med. 2020; 246:112707.  
31  
32 349 23. Brooks SK, Greenberg N. Non-deployment factors affecting psychological wellbeing in  
33  
34 350 military personnel: literature review. J Ment Health. 2018;27(1):80-90.  
35  
36 351 24. Feng Y, Parkin D, Devlin NJ. Assessing the performance of the EQ-VAS in the NHS  
37  
38 352 PROMs programme. Qual Life Res. 2014;23(3):977-89.  
39  
40 353 25. Austin G, Calvert Toby, Fasi N, et al. Soldiering on only goes so far: How a qualitative  
41  
42 354 study on Veteran loneliness in New Zealand influenced that support during COVID-19  
43  
44 355 lockdown. Journal of Military, Veteran and Family Health. 2020;6(S2):60-69.  
45  
46 356 26. Richardson A, Gurung G, Samaranayaka A, et al. Risk and protective factors for post-  
47  
48 357 traumatic stress among New Zealand military personnel: A cross sectional study. PLoS  
49  
50 358 One. 2020;15(4):e0231460.  
51  
52 359 27. Boehmer TK, Boothe VL, Flanders WD et al. Health-related quality of life of U.S. military  
53  
54 360 personnel: a population-based study. Mil Med. 2003;168(11):941-7.  
55  
56 361 28. Porter B, Long K, Rull RP, et al. Health Status of Gulf War and Era Veterans Serving in  
57  
58 362 the US Military in 2000. J Occup Environ Med. 2018;60(5):e261-e67.  
59  
60 363 29. Williamson V, Diehle J, Dunn R, et al. The impact of military service on health and well-  
364  
being. Occup Med (Lond). 2019;69(1):64-70.

- 1  
2 365 30. Diaz Santana MV, Eber S, Barth S, Cypel Y et al. Health-Related Quality of Life Among  
3  
4 366 U.S. Veterans of Operation Enduring Freedom and Operation Iraqi Freedom-Results  
5  
6 367 From a Population-Based Study. *Mil Med.* 2017;182(11):e1885-e91.  
7  
8 368 31. Newby JH, McCarroll JE, Ursano RJ, et al. Positive and negative consequences of a  
9  
10 369 military deployment. *Mil Med.* 2005;170(10):815-9.  
11  
12 370 32. McCarthy E, DeViva JC, Norman SB, et al. Self-assessed sleep quality partially mediates  
13  
14 371 the relationship between PTSD symptoms and functioning and quality of life in U.S.  
15  
16 372 Veterans: Results from the National Health and Resilience in Veterans Study. *Psychol*  
17  
18 373 *Trauma.* 2019;11(8):869-76.  
19  
20 374 33. Wolgast M. What does the Acceptance and Action Questionnaire (AAQ-II) really  
21  
22 375 measure? *Behav Ther.* 2014;45(6):831-839.  
23  
24 376 34. Hayes SC, Luoma JB, Bond FW, Masuda A, Lillis J. Acceptance and commitment  
25  
26 377 therapy: model, processes and outcomes. *Behav Res Ther.* 2006;44(1):1-25.  
27  
28 378 35. Lang AJ, Schnurr PP, Jain S, He F, Walser RD, Bolton E, et al. Randomized controlled  
29  
30 379 trial of acceptance and commitment therapy for distress and impairment in  
31  
32 380 OEF/OIF/OND Veterans. *Psychol Trauma.* 2017;9(Suppl 1):74-84.  
33  
34 381 36. Troxel WM et al. Sleep in the Military: Promoting Healthy Sleep Among U.S.  
35  
36 382 Servicemembers. RAND Corporation, 2015[cited 2021 August 28]. Available from:  
37  
38 383 [https://www.rand.org/content/dam/rand/pubs/research\\_reports/RR700/RR739/RAND\\_RR739.pdf](https://www.rand.org/content/dam/rand/pubs/research_reports/RR700/RR739/RAND_RR739.pdf).  
39  
40 384  
41 385 37. Sweetman A et al. A step-by-step model for a brief behavioural treatment for  
42  
43 386 insomnia in Australian general practice. *Aust J Gen Pract.* 2021;50(5):287–293.  
44  
45 387  
46  
47  
48  
49  
50  
51  
52  
53  
54  
55  
56  
57  
58  
59  
60

## 388 DATA SHARING STATEMENT

389 Data from this study is unsuitable for public deposition due to the privacy of participant data.  
390 Data are anonymised, but contain information on deployments (including location and  
391 duration), which could lead to some participants being identified. Furthermore, the  
392 participant information sheet, as required by the Southern Health and Disability Ethics  
393 Committee specifically contains the statement that 'all study data would be kept strictly  
394 confidential to the research team.' Qualified researchers may apply for data access with the  
395 research team at veterans.health@otago.ac.nz and/or hdecs@moh.govt.nz.

## 396 FUNDING

397 This work was supported by a research grant from the Ministerial Veterans Health Advisory  
398 Panel, funded through the War Pensions Medical Research Trust Fund, also by Lottery Health  
399 and the Royal New Zealand Returned and Services Association.

## 400 COMPETING INTERESTS

401 None declared.

## 402 CONTRIBUTION

403 **Investigation:** Amy Richardson, Emma H. Wyeth, Sarah Derrett, Daniel Shepherd, David  
404 McBride.

405 **Methodology:** Amy Richardson, Ari Samaranayaka, Dianne Gardner, Emma H. Wyeth, Sarah  
406 Derrett, David McBride. Daniel Shepherd

407 **Project administration:** Amy Richardson

408 **Resources:** Brandon de Graaf

409 **Software:** Brandon de Graaf

410 **Supervision:** Ari Samaranayaka

411 **Validation:** Amy Richardson

412 **Visualization:** Amy Richardson

413 **Writing – original draft:** David McBride. AS, DG, EHW, SD and DS contributed to the re-writes  
414 and final draft

## 415 ACKNOWLEDGEMENTS

416 We would like to thank Shane Harvey for his input into the initial design, Aidan Smith, previous  
417 research advisor to the NZDF, for steering us through the consents process, also the members  
418 of our steering group: COL Clare Bennett (NZDF); Ms Marti Eller (New Zealand Veterans

1  
2 419 Affairs); Mark Compain, Danny Nelson and Richard Terrill (RSA); and NoDuff representatives  
3  
4 420 Aaron Wood and Lars Millar.  
5  
6 421 Finally, a thank you to the New Zealand Veterans who took the time and effort to complete a  
7  
8 422 rather tedious questionnaire. Kia Kaha.  
9  
10  
11  
12  
13  
14  
15  
16  
17  
18  
19  
20  
21  
22  
23  
24  
25  
26  
27  
28  
29  
30  
31  
32  
33  
34  
35  
36  
37  
38  
39  
40  
41  
42  
43  
44  
45  
46  
47  
48  
49  
50  
51  
52  
53  
54  
55  
56  
57  
58  
59  
60

For peer review only

1  
2  
3  
4  
5  
6  
7  
8  
9  
10  
11  
12  
13  
14  
15  
16  
17  
18  
19  
20  
21  
22  
23  
24  
25  
26  
27  
28  
29  
30  
31  
32  
33  
34  
35  
36  
37  
38  
39  
40  
41  
42  
43  
44  
45  
46  
47  
48  
49  
50  
51  
52  
53  
54  
55  
56  
57  
58  
59  
60

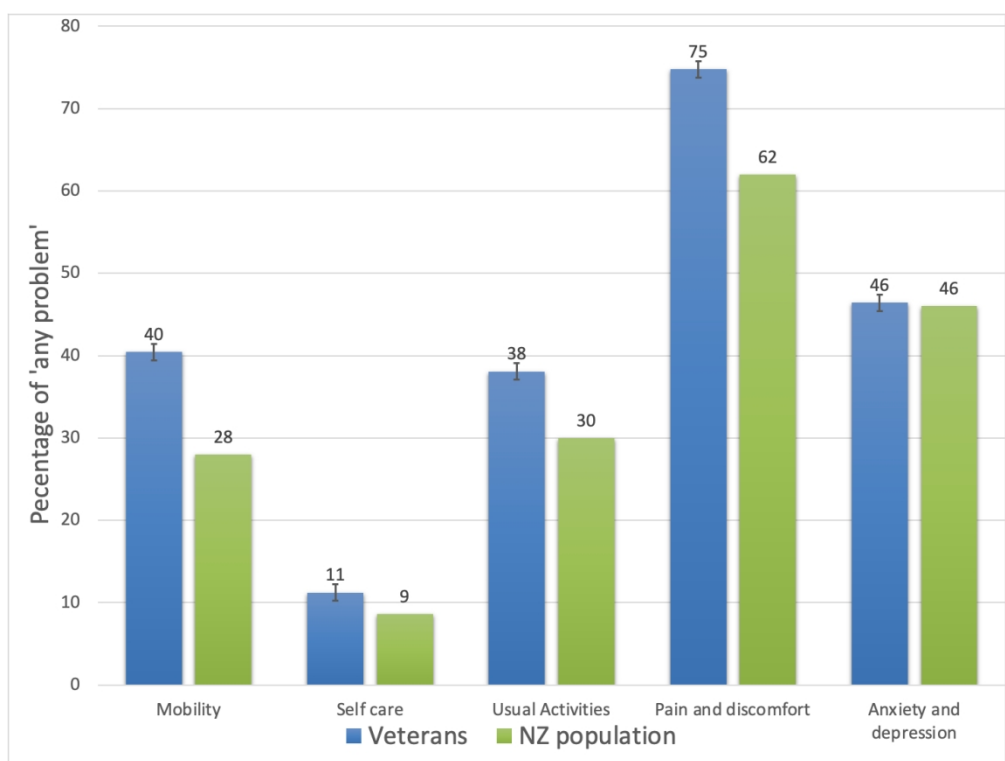

The proportion of Veterans reporting 'any problem' with each of the EQ-5D-5L dimension scores compared to the NZ population normative proportions

123x93mm (300 x 300 DPI)

**Supplementary Table: Number of participants and EQ-VAS scores according to sample characteristics**

| <b>Exposure variable</b>       | <b>N(%)</b> | <b>Mean (SD)</b> |
|--------------------------------|-------------|------------------|
| <b>All</b>                     | 1767        | 74.4 (17.1)      |
| <b>Age group (years)</b>       |             |                  |
| 20-29                          | 136 (7.7)   | 77.7 (14.4)      |
| 30-39                          | 328 (18.6)  | 77.0 (16.2)      |
| 40-49                          | 438 (24.8)  | 76.1 (14.6)      |
| 50-59                          | 350 (19.8)  | 74.8 (16.6)      |
| 60-69                          | 285 (16.1)  | 71.4 (19.8)      |
| 70-79                          | 175 (9.9)   | 69.4 (19.4)      |
| 80+                            | 50 (2.8)    | 66.2 (20.3)      |
| Missing                        | 5 (0.3)     | 61.2 (22.1)      |
| <b>Gender</b>                  |             |                  |
| Female                         | 220 (12.5)  | 70.3 (17.2)      |
| Male                           | 1520 (86.0) | 74.4 (17.2)      |
| Missing                        | 27 (1.5)    | 75.0 (55.0)      |
| <b>Ethnicity (prioritised)</b> |             |                  |
| NZ European                    | 1382 (78.2) | 74.4 (17.1)      |
| Māori                          | 245 (13.9)  | 75.6 (16.1)      |
| Other                          | 140 (7.9)   | 71.5 (19.3)      |
| <b>Service years</b>           |             |                  |
| 0-9                            | 339 (19.2)  | 69.9 (19.7)      |
| 10-19                          | 478 (27.1)  | 74.5 (17.9)      |
| 20-29                          | 530 (30.0)  | 75.3 (15.9)      |
| 30-39                          | 254 (14.4)  | 76.3 (14.6)      |
| 40+                            | 69 (3.9)    | 75.4 (16.4)      |
| Missing                        | 97 (5.5)    | 78.8 (14.2)      |
| <b>Deployment (ever)</b>       |             |                  |
| No                             | 288 (16.3)  | 69.5 (19.9)      |
| Yes                            | 1458 (82.5) | 75.3 (16.4)      |
| Missing                        | 21 (1.2)    | 75.6 (14.6)      |
| <b>GHQ12 Score</b>             |             |                  |
| 0-9                            | 652 (36.9)  | 82.0 (12.6)      |
| 10-19                          | 972 (55.0)  | 72.3 (16.0)      |
| 20-29                          | 123 (7.0)   | 54.3 (20.3)      |
| 30+                            | 18 (1.0)    | 46.2 (24.4)      |
| Missing                        | 2 (0.1)     | -                |

\*sub-scores not used in multivariable models.

## Supplementary table contd.

| <b>Social support full score</b>   |      |                    |
|------------------------------------|------|--------------------|
| 24-29                              | 0    | 0 -                |
| 30-39                              | 3    | (0.2) 66.7 (15.3)  |
| 40-49                              | 15   | (0.8) 44.5 (22.5)  |
| 50-59                              | 97   | (5.5) 62.4 (21.8)  |
| 60-69                              | 351  | (19.9) 69.0 (18.2) |
| 70-79                              | 643  | (36.4) 75.1 (15.0) |
| 80-89                              | 409  | (23.1) 78.0 (15.0) |
| 90-96                              | 235  | (13.3) 81.9 (13.9) |
| Missing                            | 14   | (0.8) 58.1 (25.6)  |
| <b>Social support sub-scores</b>   |      |                    |
| <b>Attachment*</b>                 |      |                    |
| 4-7                                | 51   | (3.5) 61.4 (23.4)  |
| 8-11                               | 516  | (29.2) 68.7 (18.0) |
| 12-16                              | 1193 | (67.5) 77.5 (15.5) |
| Missing                            | 7    | (0.4) 61.0 (19.7)  |
| <b>Social integration*</b>         |      |                    |
| 4-7                                | 20   | (1.1) 56.2 (25.1)  |
| 8-11                               | 429  | (24.3) 67.1 (19.4) |
| 12-16                              | 1309 | (74.8) 77.1 (15.2) |
| Missing                            | 9    | (0.5) 58.7 (21.5)  |
| <b>Reassurance of worth*</b>       |      |                    |
| 4-7                                | 37   | (2.1) 59.1 (19.5)  |
| 8-11                               | 504  | (28.5) 69.0 (19.1) |
| 12-16                              | 1215 | (68.8) 77.2 (15.2) |
| Missing                            | 11   | (0.6) 62.0 (24.9)  |
| <b>Reliable Alliance*</b>          |      |                    |
| 4-7                                | 20   | (1.1) 49.6 (22.2)  |
| 8-11                               | 251  | (14.2) 66.9 (20.1) |
| 12-16                              | 1489 | (84.3) 76.0 (15.9) |
| Missing                            | 7    | (0.4) 61.0 (19.7)  |
| <b>Guidance sub-score*</b>         |      |                    |
| 4-7                                | 36   | (2.0) 59.2 (22.2)  |
| 8-11                               | 387  | (21.9) 68.7 (18.9) |
| 12-16                              | 1337 | (75.7) 76.6 (15.7) |
| Missing                            | 7    | (0.4) 54.6 (21.6)  |
| <b>Opportunity for nurturance*</b> |      |                    |
| 4-7                                | 29   | (1.6) 69.3 (18.9)  |
| 8-11                               | 413  | (23.4) 71.9 (18.8) |
| 12-16                              | 1316 | (74.5) 75.4 (16.4) |
| Missing                            | 9    | (0.5) 58.7 (21.5)  |

## Supplementary table, contd.

**Psychological flexibility score  
(AAQii score).**

|         |     |        |             |
|---------|-----|--------|-------------|
| 10-19   | 5   | (0.3)  | 23.2 (13.8) |
| 20-29   | 40  | (2.3)  | 49.1 (22.1) |
| 30-39   | 147 | (8.3)  | 63.0 (18.6) |
| 40-49   | 43  | (24.7) | 68.5 (16.8) |
| 50-59   | 664 | (37.6) | 77.1 (13.9) |
| 60-70   | 457 | (25.9) | 82.5 (13.5) |
| Missing | 1   | (1.0)  | 69.6 (20.5) |

**Sleep Condition Indicator (SCI score)**

|         |     |        |             |
|---------|-----|--------|-------------|
| 0 to <2 | 67  | (3.8)  | 51.2 (22.3) |
| 2 to <4 | 264 | (14.9) | 62.2 (19.5) |
| 4 to <6 | 646 | (36.6) | 74.3 (14.6) |
| 6 to <8 | 384 | (21.7) | 77.6 (14.2) |
| 8 to 10 | 386 | (21.8) | 83.5 (12.2) |
| Missing | 20  | (1.1)  | 77.3 (12.8) |

**AUDIT-C score**

|               |     |        |             |
|---------------|-----|--------|-------------|
| Non-hazardous | 776 | (43.9) | 74.0 (17.4) |
| Hazardous     | 915 | (51.8) | 74.6 (16.9) |
| Missing       | 76  | (4.3)  | 75.0 (17.0) |

**Brief Trauma Questionnaire  
(DSM-IV criteria)**

|             |      |        |             |
|-------------|------|--------|-------------|
| Not exposed | 544  | (30.8) | 78.3 (15.1) |
| Exposed     | 1210 | (68.5) | 72.5 (17.8) |
| Missing     | 13   | (0.7)  | 80.6 (8.1)  |



STROBE Statement—Checklist of items that should be included in reports of *cross-sectional studies*

|                              | Item No | Recommendation                                                                                                                                                                                                                                                                                                                                                                                                                                                                              |
|------------------------------|---------|---------------------------------------------------------------------------------------------------------------------------------------------------------------------------------------------------------------------------------------------------------------------------------------------------------------------------------------------------------------------------------------------------------------------------------------------------------------------------------------------|
| <b>Title and abstract</b>    | 1       | Indicate the study's design with a commonly used term in the title or the abstract.<br><b>Yes, a cross sectional study, p1 title.</b><br>(b) Provide in the abstract an informative and balanced summary of what was done and what was found <b>Background, results and conclusions, p 1</b>                                                                                                                                                                                                |
| <b>Introduction</b>          |         |                                                                                                                                                                                                                                                                                                                                                                                                                                                                                             |
| Background/rationale         | 2       | Explain the scientific background and rationale for the investigation being reported<br><b>Introduction p2.</b>                                                                                                                                                                                                                                                                                                                                                                             |
| Objectives                   | 3       | State specific objectives, including any prespecified hypotheses <b>p2, lines 59 and 60</b>                                                                                                                                                                                                                                                                                                                                                                                                 |
| <b>Methods</b>               |         |                                                                                                                                                                                                                                                                                                                                                                                                                                                                                             |
| Study design                 | 4       | Present key elements of study design early in the paper <b>p2 line 62 to page 5 line 145</b>                                                                                                                                                                                                                                                                                                                                                                                                |
| Setting                      | 5       | Describe the setting, locations, and relevant dates, including periods of recruitment, exposure, follow-up, and data collection <b>Participants, page2 line 63- page 3 line 83.</b>                                                                                                                                                                                                                                                                                                         |
| Participants                 | 6       | (a) Give the eligibility criteria, and the sources and methods of selection of participants <b>page 2 line 64 to page 3, line 68.</b>                                                                                                                                                                                                                                                                                                                                                       |
| Variables                    | 7       | Clearly define all outcomes, exposures, predictors, potential confounders, and effect modifiers. Give diagnostic criteria, if applicable <b>Questionnaire, pp 3-5.</b>                                                                                                                                                                                                                                                                                                                      |
| Data sources/<br>measurement | 8*      | For each variable of interest, give sources of data and details of methods of assessment (measurement). Describe comparability of assessment methods if there is more than one group <b>as above</b>                                                                                                                                                                                                                                                                                        |
| Bias                         | 9       | Describe any efforts to address potential sources of bias <b>Methods, page 3. Lines 76-83.</b>                                                                                                                                                                                                                                                                                                                                                                                              |
| Study size                   | 10      | Explain how the study size was arrived at <b>p5 line 137</b>                                                                                                                                                                                                                                                                                                                                                                                                                                |
| Quantitative variables       | 11      | Explain how quantitative variables were handled in the analyses. If applicable, describe which groupings were chosen and why Cases defined through the <b>Multivariable logistic regression with the EQ-Visual analogue scale as the outcome measure, p5 lines 131-136</b>                                                                                                                                                                                                                  |
| Statistical methods          | 12      | (a) Describe all statistical methods, including those used to control for confounding <b>Backward elimination process p5 lines 134-135</b><br>(b) Describe any methods used to examine subgroups and interactions <b>By multivariable logistic regression, p5 as above</b><br>(c) Explain how missing data were addressed <b>p4 lines 122-125</b><br>(d) If applicable, describe analytical methods taking account of sampling strategy<br>N/A<br>(e) Describe any sensitivity analyses N/A |
| <b>Results</b>               |         |                                                                                                                                                                                                                                                                                                                                                                                                                                                                                             |
| Participants                 | 13*     | (a) Report numbers of individuals at each stage of study—eg numbers potentially eligible, examined for eligibility, confirmed eligible, included in the study, completing follow-up, and analysed <b>Potentially eligible lines 68-73 p 3</b><br>(b) Give reasons for non-participation at each stage N/A<br>(c) Consider use of a flow diagram N/A                                                                                                                                         |

|                          |     |                                                                                                                                                                                                                                                                                                                                                                                                                                                                                                                                                                             |
|--------------------------|-----|-----------------------------------------------------------------------------------------------------------------------------------------------------------------------------------------------------------------------------------------------------------------------------------------------------------------------------------------------------------------------------------------------------------------------------------------------------------------------------------------------------------------------------------------------------------------------------|
| Descriptive data         | 14* | (a) Give characteristics of study participants (eg demographic, clinical, social) and information on exposures and potential confounders <b>page 5 et seq, table 1</b><br>(b) Indicate number of participants with missing data for each variable of interest ' <b>n used</b> ' columns <b>tables 2 and 3.</b>                                                                                                                                                                                                                                                              |
| Outcome data             | 15* | Report numbers of outcome events or summary measures <b>as per tables</b>                                                                                                                                                                                                                                                                                                                                                                                                                                                                                                   |
| Main results             | 16  | (a) Give unadjusted estimates and, if applicable, confounder-adjusted estimates and their precision (eg, 95% confidence interval). Make clear which confounders were adjusted for and why they were included <b>Tables, adjusted for age, sex, service years and deployment status.</b><br>(b) Report category boundaries when continuous variables were categorized. <b>Independent variables, p 3 and 4, EQ-VAS is a continuous scale.</b><br>(c) If relevant, consider translating estimates of relative risk into absolute risk for a meaningful time period <b>N/A</b> |
| Other analyses           | 17  | Report other analyses done—eg analyses of subgroups and interactions, and sensitivity analyses <b>N/A</b>                                                                                                                                                                                                                                                                                                                                                                                                                                                                   |
| <b>Discussion</b>        |     |                                                                                                                                                                                                                                                                                                                                                                                                                                                                                                                                                                             |
| Key results              | 18  | Summarise key results with reference to study objectives <b>Discussion, p11 first para</b>                                                                                                                                                                                                                                                                                                                                                                                                                                                                                  |
| Limitations              | 19  | Discuss limitations of the study, taking into account sources of potential bias or imprecision. Discuss both direction and magnitude of any potential bias <b>Discussion lines 215 et seq.</b>                                                                                                                                                                                                                                                                                                                                                                              |
| Interpretation           | 20  | Give a cautious overall interpretation of results considering objectives, limitations, multiplicity of analyses, results from similar studies, and other relevant evidence <b>Discussion, p12 lines 230 et seq.</b>                                                                                                                                                                                                                                                                                                                                                         |
| Generalisability         | 21  | Discuss the generalisability (external validity) of the study results <b>p17, line 215 et seq.</b>                                                                                                                                                                                                                                                                                                                                                                                                                                                                          |
| <b>Other information</b> |     |                                                                                                                                                                                                                                                                                                                                                                                                                                                                                                                                                                             |
| Funding                  | 22  | Give the source of funding and the role of the funders for the present study and, if applicable, for the original study on which the present article is based <b>Funding, p18</b>                                                                                                                                                                                                                                                                                                                                                                                           |

\*Give information separately for exposed and unexposed groups.

**Note:** An Explanation and Elaboration article discusses each checklist item and gives methodological background and published examples of transparent reporting. The STROBE checklist is best used in conjunction with this article (freely available on the Web sites of PLoS Medicine at <http://www.plosmedicine.org/>, Annals of Internal Medicine at <http://www.annals.org/>, and Epidemiology at <http://www.epidem.com/>). Information on the STROBE Initiative is available at [www.strobe-statement.org](http://www.strobe-statement.org).

# BMJ Open

## Factors associated with self-reported health among New Zealand military Veterans: A cross-sectional study

|                                 |                                                                                                                                                                                                                                                                                                                                                                                                                                                                                                                                                                                                                                                                                                                                        |
|---------------------------------|----------------------------------------------------------------------------------------------------------------------------------------------------------------------------------------------------------------------------------------------------------------------------------------------------------------------------------------------------------------------------------------------------------------------------------------------------------------------------------------------------------------------------------------------------------------------------------------------------------------------------------------------------------------------------------------------------------------------------------------|
| Journal:                        | <i>BMJ Open</i>                                                                                                                                                                                                                                                                                                                                                                                                                                                                                                                                                                                                                                                                                                                        |
| Manuscript ID                   | bmjopen-2021-056916.R1                                                                                                                                                                                                                                                                                                                                                                                                                                                                                                                                                                                                                                                                                                                 |
| Article Type:                   | Original research                                                                                                                                                                                                                                                                                                                                                                                                                                                                                                                                                                                                                                                                                                                      |
| Date Submitted by the Author:   | 14-Feb-2022                                                                                                                                                                                                                                                                                                                                                                                                                                                                                                                                                                                                                                                                                                                            |
| Complete List of Authors:       | McBride, David; University of Otago Dunedin School of Medicine, Department of Preventive and Social Medicine<br>Samaranayaka, Ariyapala; University of Otago Division of Health Sciences, Biostatistics Centre<br>Richardson, Amy; University of Otago Dunedin School of Medicine, Preventive and Social Medicine<br>Gardner, D; Massey University, Department of Psychology<br>Shepherd, Daniel; Auckland University of Technology, Health Sciences<br>Wyeth, Emma; University of Otago, Ngāi Tahu Māori Health Research Unit<br>de Graaf, Brandon; University of Otago Dunedin School of Medicine, Injury Prevention Research Unit<br>Derrett, Sarah; University of Otago Dunedin School of Medicine, Preventive and Social Medicine |
| <b>Primary Subject Heading</b>: | Epidemiology                                                                                                                                                                                                                                                                                                                                                                                                                                                                                                                                                                                                                                                                                                                           |
| Secondary Subject Heading:      | Occupational and environmental medicine, Public health                                                                                                                                                                                                                                                                                                                                                                                                                                                                                                                                                                                                                                                                                 |
| Keywords:                       | EPIDEMIOLOGY, OCCUPATIONAL & INDUSTRIAL MEDICINE, Health & safety < HEALTH SERVICES ADMINISTRATION & MANAGEMENT, Risk management < HEALTH SERVICES ADMINISTRATION & MANAGEMENT, MENTAL HEALTH, Musculoskeletal disorders < ORTHOPAEDIC & TRAUMA SURGERY                                                                                                                                                                                                                                                                                                                                                                                                                                                                                |
|                                 |                                                                                                                                                                                                                                                                                                                                                                                                                                                                                                                                                                                                                                                                                                                                        |

SCHOLARONE™  
Manuscripts



I, the Submitting Author has the right to grant and does grant on behalf of all authors of the Work (as defined in the below author licence), an exclusive licence and/or a non-exclusive licence for contributions from authors who are: i) UK Crown employees; ii) where BMJ has agreed a CC-BY licence shall apply, and/or iii) in accordance with the terms applicable for US Federal Government officers or employees acting as part of their official duties; on a worldwide, perpetual, irrevocable, royalty-free basis to BMJ Publishing Group Ltd ("BMJ") its licensees and where the relevant Journal is co-owned by BMJ to the co-owners of the Journal, to publish the Work in this journal and any other BMJ products and to exploit all rights, as set out in our [licence](#).

The Submitting Author accepts and understands that any supply made under these terms is made by BMJ to the Submitting Author unless you are acting as an employee on behalf of your employer or a postgraduate student of an affiliated institution which is paying any applicable article publishing charge ("APC") for Open Access articles. Where the Submitting Author wishes to make the Work available on an Open Access basis (and intends to pay the relevant APC), the terms of reuse of such Open Access shall be governed by a Creative Commons licence – details of these licences and which [Creative Commons](#) licence will apply to this Work are set out in our licence referred to above.

Other than as permitted in any relevant BMJ Author's Self Archiving Policies, I confirm this Work has not been accepted for publication elsewhere, is not being considered for publication elsewhere and does not duplicate material already published. I confirm all authors consent to publication of this Work and authorise the granting of this licence.

1  
2  
3 **FACTORS ASSOCIATED WITH SELF-REPORTED HEALTH AMONG NEW ZEALAND MILITARY**  
4 **VETERANS: A CROSS-SECTIONAL STUDY**  
5

6 David McBride,<sup>1</sup> Ari Samaranayaka<sup>2</sup>, Amy Richardson,<sup>1</sup> Dianne Gardner,<sup>3</sup> Daniel Shepherd,<sup>4</sup>  
7  
8 Emma H. Wyeth<sup>5</sup>, Brandon deGraaf,<sup>6</sup> Sarah Derrett.<sup>1</sup>  
9

10 <sup>1</sup>Department of Preventive and Social Medicine, Dunedin School of Medicine, University of  
11 Otago, New Zealand.

12 <sup>2</sup>Biostatistics Centre, Division of Health Sciences, University of Otago, Dunedin, New Zealand.

13 <sup>3</sup>School of Psychology, Massey University, New Zealand.

14 <sup>4</sup>Department of Psychology, Auckland University of Technology, New Zealand.

15 <sup>5</sup>Ngāi Tahu Māori Health Research Unit, Department of Preventive and Social Medicine,  
16 Dunedin School of Medicine, University of Otago, New Zealand.

17 <sup>6</sup>Injury Prevention Research Unit, Department of Preventive and Social Medicine, Dunedin  
18 School of Medicine, University of Otago, New Zealand.

19 **Keywords:**

20 Military Medicine

21 Quality of Life

22 Risk Factors

23 Protective Factors

24 Point Prevalence

25 **Word count**

26 2959

27 **Corresponding Author:**

28 David McBride, Department of Preventive and Social Medicine, Adams Building, 18 Frederick  
29 Street, Dunedin 9017, New Zealand.

30 Email: [david.mcbride@otago.ac.nz](mailto:david.mcbride@otago.ac.nz)

31 Phone: +64 3 479 7208

32 Fax: +64 3 479 7298

## 1 **ABSTRACT**

### 2 **Objective**

3 To identify factors associated with better or poorer self-reported health status in New Zealand  
4 military Veterans.

### 5 **Design**

6 An online cross-sectional survey.

### 7 **Participants**

8 The participants of interest were the 3,874 currently serving Veterans who had been deployed  
9 to a conflict zone, but all Veterans were eligible to participate.

### 10 **Study variables**

11 Health status was self-reported using the EQ-5D-5L, which asks about problems across five  
12 dimensions (mobility, self-care, usual activities, pain or discomfort, and anxiety or  
13 depression), with five levels of severity (e.g. no, slight, moderate, severe or extreme  
14 problems), also containing a visual analogue scale (EQ-VAS), scaled from 0 (worst) to 100  
15 (best) imagined health. Hypothetical relationships with better health were positive social  
16 support, sleep and psychological flexibility; with poorer health, exposure to psychological  
17 trauma, distress and hazardous drinking.

### 18 **Results:**

19 The EQ5-D was completed by 1767 Veterans, 1009 serving, a response rate of 26% from that  
20 group, with 1767 completing the EQ5-D and entering the analysis, comprising 1458 who had  
21 deployed, 288 who had not, and the 21 who did not provide deployment data.

22 A significantly higher proportion of Veterans reported 'any problems' rather than 'no  
23 problems' with four EQ-5D dimensions: mobility, self-care, usual activities and pain or  
24 discomfort, but no difference in anxiety or depression. Age, length of service, deployment,  
25 psychological flexibility and better sleep quality were associated with higher EQ-VAS scores;  
26 distress with lower EQ-VAS scores.

### 27 **Conclusion:**

28 In this sample of New Zealand Veterans, psychological flexibility and good sleep are associated  
29 with better self-rated health, and distress and poor sleep with diminished health. These  
30 factors might be used as sentinel health indicators in assessing Veteran health status. As  
31 distress, psychological flexibility and sleep are closely related, cognitive behavioural therapy  
32 encompassing these domains may be useful in improving the health of New Zealand Veterans.

### 33 **Keywords:**

34 Self-rated health, wellbeing, EQ-5D, Veterans, deployment, military, risk factors.

### 35 **Strengths and limitations of this study**

- 36 • Many studies of Veterans have focused on adverse outcomes, but we have been able
- 37 to focus on a holistic measure of ‘health’.
- 38 • The study was sufficiently powered to detect important relationships indicating
- 39 opportunities for intervention.
- 40 • The exact response rate is unknown, and bias may be a limitation.
- 41 • The cross-sectional design means that we cannot explore cause and effect
- 42 relationships.

### 43 **INTRODUCTION**

44 The three major events in the military life course are entry to military service, deployment on  
45 active service and transition back to civilian life. On entry, soldiers, sailors and air personnel  
46 are subject to a selection process to ensure, as far as possible, good physical and mental  
47 health, giving rise to the ‘healthy soldier effect,’ with service personnel being, on average,  
48 healthier than the general population.[1] However, the physical and psychological stressors  
49 of military service have been found to erode this effect.[2]

50 The physical stressors have a particular impact on the lower limb, with load carriage, high  
51 intensity training and the design of footwear being implicated in injury causation.[3] A military  
52 career also increases opportunities for psychological trauma, and post-traumatic stress  
53 disorder (PTSD) has been identified as the ‘signature injury’ of United States service men and  
54 women deployed to Afghanistan and Iraq.[4]

55 A focus on adverse health events in the literature[5] means that wellbeing is relatively  
56 overlooked. In the long run, military service has been found to have positive effects.[6,7]  
57 Good health after service does, however, depend on the success of the ‘military civilian  
58 transition’, a complex process for which models have been developed.[8] Health problems  
59 developed in service, difficulty in assuming a post-service identity and many other factors  
60 contribute to health and wellbeing outcomes.[8] In New Zealand, military Veterans can only  
61 access assistance from New Zealand Veteran’s Affairs (NZVA) if they have undertaken  
62 ‘qualifying operational service’ as defined by the Veteran Support Act 2014,[9] thus being  
63 Veterans in a legal sense. NZVA support some 12,000 Veterans, with an average age of 80  
64 years, 5000 being actively case managed.[10] The majority will have seen operational service  
65 in Korea, Borneo, Malaya and Vietnam. Post-Vietnam, smaller numbers deployed on United  
66 Nations and other missions, but the tempo of operations rose with the deployment to  
67 Bosnia in 1992, and some 9,000-10,000 ‘legal’ Veterans deployed between then and the

1  
2 68 withdrawal of New Zealand troops from Afghanistan in 2021. The Ministerial Veteran's  
3  
4 69 Health Advisory Panel, established under the Veteran Support Act, are specifically charged  
5  
6 70 with funding research on this 'contemporary Veteran' group, NZVA acknowledging that they  
7  
8 71 "have had different experiences, and have different needs, compared to the older veterans.  
9  
10 72 They are likely to have served in a number of deployments during their career, and come to  
11  
12 73 us with more complex health issues." [10]  
13  
14 74 The aims of this study were therefore to describe self-reported health among these Veterans,  
15  
16 75 and identify factors associated with better or poorer health.

## 17 76 **Veteran and public involvement**

18 77 The Ministerial Veterans Health Advisory Panel, [10] commissioned the study and advised on  
19  
20 78 the design. We also formed a steering group with representatives from the New Zealand  
21  
22 79 Defence Force, New Zealand Veterans Affairs, the Royal New Zealand Returned and Services  
23  
24 80 Association (RSA) [11] and No Duff, [12] a charity providing first response support to Veterans  
25  
26 81 and their families. We also consulted with the Ngāi Tahu Research Consultation Committee in  
27  
28 82 order to assess the importance of the project to Māori, New Zealand's indigenous population.  
29  
30 83 We undertook to inform the Veteran community before releasing the results, to which end a  
31  
32 84 link to the paper will be posted on the military social media sites where the study was  
33  
34 85 advertised, and to give all Veterans, defined as anyone who had served in the military, an  
35  
36 86 opportunity to participate. Participants were not recruited as patients.

## 37 87 **METHODS**

### 38 88 **Participants**

39 89 Data were collected via an online survey, a postal version being available on request. There is  
40  
41 90 no comprehensive Veteran registry, however in July 2018, a link to the online questionnaire  
42  
43 91 was sent by email to all currently serving regular and reserve New Zealand Defence Force  
44  
45 92 (NZDF) members registered on the NZDF email system who were 'legal Veterans', as indicated  
46  
47 93 by holding the New Zealand Operational Service Medal, numbering 3,874 personnel at that  
48  
49 94 time. An introductory message and link to the questionnaire were also presented on the NZDF  
50  
51 95 'intranet landing page', a secure internal webpage from which all regular force personnel can  
52  
53 96 access relevant work-related content, tools, and resources. Retired military personnel were  
54  
55 97 invited to participate through posters distributed to reserve units and the 43 local social clubs  
56  
57 98 identified by the RSA national office to be 'Veteran active.' Paper questionnaires with return  
58  
59 99 postage envelopes were made available at these sites. Announcements were also made on  
60  
100 100 military social media pages, and both retired and currently serving personnel were invited to



1  
2 101 participate through an announcement on the No Duff website. The questionnaire was  
3  
4 102 available for completion from June to December 2018.

### 103 **Ethics approval**

7 104 Ethics approval for the study was obtained from the Northern B Health and Disability Ethics  
8  
9 105 Committee, reference 17NTB118.

### 106 **Questionnaire**

#### 107 *Criterion variable*

15 108 Self-rated health status was assessed using the EQ-5D-5L,[13] a short questionnaire asking  
16  
17 109 about the respondent's health across five dimensions: mobility, self-care, usual activities, pain  
18  
19 110 or discomfort and anxiety or depression, with response options ranging from (e.g.) 'no  
20  
21 111 problems', to 'extreme problems'. For each dimension, participants were categorised as  
22  
23 112 having 'any problems' if they selected any response other than 'no problems'.

24 113 Additionally, the EQ-5D-5L visual analogue scale (EQ-VAS) asks the respondent to mark on a  
25  
26 114 vertical visual analogue scale (VAS) how good or bad their health is today, where the  
27  
28 115 endpoints are labelled 'the best health you can imagine' (score of 100) and 'the worst health  
29  
30 116 you can imagine' (score of 0).

#### 117 *Independent variables*

33 118 Demographic characteristics included age, sex, ethnicity, service years, and past deployment  
34  
35 119 on operational service (yes/no). Ethnicity prioritisation was adopted,[14] whereby  
36  
37 120 participants with multiple responses were assigned to one of the categories, in the order of  
38  
39 121 Māori, Pacific Peoples, Other and European.

40 122 General psychiatric morbidity was assessed using the 12-item General Health Questionnaire  
41  
42 123 (GHQ-12),[15] scored using a four point scale (0-3) and summing the 12 items to give a total  
43  
44 124 score, with higher scores indicating elevated distress.

46 125 Social support was measured using the Social Provisions Scale,[16] with responses made on a  
47  
48 126 four-point Likert-type scale ranging from 1 'strongly disagree' to 4 'strongly agree'. The 24  
49  
50 127 items can be reduced to six subscales (attachment, social integration, reassurance of worth,  
51  
52 128 reliable alliance, social guidance, opportunity for nurturance) or summed to create a total  
53  
54 129 score, with greater scores indicating greater social support.

55 130 Alcohol use was measured using the AUDIT-C,[17] scaled from 0-12. A score of 3+ for women  
56  
57 131 and 4+ for men indicated potentially hazardous drinking behaviour.

58 132 Sleep quality was assessed with the Sleep Condition Indicator (SCI), [18] assessing insomnia as  
59  
60 133 described in the Diagnostic and Statistical Manual of Mental Disorders version 5 (DSM-V).[19]

1  
2 134 The SCI consists of eight items rated from 0-4, the total scores being scaled to a range of 0 to  
3  
4 135 10, where higher scores represent better sleep.

5 136 Trauma exposure was assessed with the Brief Trauma Scale (BTS),[20] which captures past  
6  
7 137 exposure to situations that were life threatening or capable of producing serious injury.

8  
9 138 Psychological flexibility was measured with the 10-item AAQ-II, designed as a measure of  
10  
11 139 effectiveness in a particular mode of behavioural intervention, Acceptance and Commitment  
12  
13 140 Therapy (ACT).[21] Items were answered on a 7-point scale, with options ranging from 'never  
14  
15 141 true' to 'always true'. The items were summed to obtain a total score (possible range 10 to  
16  
17 142 70), with higher scores indicative of greater psychological flexibility. The questionnaire is  
18  
19 143 available as supplementary material.

#### 20 144 **Statistical analyses**

21  
22 145 With respect to the calculation of summed scores, if only one item was missing for a particular  
23  
24 146 measure then this was imputed with the mean of the remaining items; if more than one item  
25  
26 147 was missing then the score was set to missing for that participant. Complete case analysis was  
27  
28 148 used in the remaining analyses. The five dimensions of the EQ-5D-5L were compared to the  
29  
30 149 NZ population normative values.[22]

31  
32 150 Z tests were used to compare the EQ5D dimension scores with those of the New Zealand  
33  
34 151 general population.[22] Univariate ordinary least-squares linear regression analyses assessed  
35  
36 152 the strength of relationships between each independent variable and EQ-VAS scores, using  
37  
38 153 robust standard errors to account for heteroscedasticity and calculating 95% confidence  
39  
40 154 intervals (95% CIs). Multivariable linear regression was then used to identify the role of the  
41  
42 155 independent variables while adjusting for each other. None of the social support sub-scales  
43  
44 156 were used in this multivariable model, instead using the social support total score. The model  
45  
46 157 was built using backward variable selection with  $p < 0.10$  for variable retention, with the  
47  
48 158 exceptions of age, sex, service years, and deployment status which were retained as adjusting  
49  
50 159 variables irrespective of p-values.

#### 51 160 **RESULTS**

52 161 The EQ-5D was completed by 1767 Veterans, 1009 who were serving (26% of that group), 458  
53  
54 162 who had retired, 288 who had not deployed, and 21 who did not provide deployment data.

55  
56 163 There are no reliable denominator data on retired and non-deployed Veterans in New  
57  
58 164 Zealand.

59 165 A supplementary table presents the EQ-VAS score according to the sample characteristics.  
60

166 Figure 1 shows the proportion of EQ-5D-5L dimension responses reporting 'any problem'  
 167 severity level other than 'no problems' in comparison to the New Zealand population  
 168 normative values,[22] with table 1 showing the 95% CI's and Z values.

169 **Figure 1 about here**

170 Table 1, Proportion of 'any problem' in EQ-5D domains

| Domain             | Veterans            | NZ population       | Z value (p)  |
|--------------------|---------------------|---------------------|--------------|
|                    | Proportion (95% CI) | Proportion (95% CI) |              |
| Mobility           | 0.40 (0.38-0.42)    | 0.28 (0.26-0.30)    | 8.5 (<.0001) |
| Self-care          | 0.11 (0.10-0.12)    | 0.09 (0.07-0.10)    | 2.8 (0.03)   |
| Usual activities   | 0.38 (0.36-0.40)    | 0.30 (0.28-0.31)    | 5.6 (<.001)  |
| Pain/discomfort    | 0.75 (0.73-0.76)    | 0.62 (0.60-0.63)    | 9.0 (<.0001) |
| Anxiety/depression | 0.46 (0.44-0.48)    | 0.46 (0.44-0.48)    | 0 (1)        |

171

172 The results of the univariate analysis are displayed in Table 2. Here, for continuous  
 173 characteristics, the regression coefficient ( $\beta$ ) represents the change in the mean EQ-VAS  
 174 associated with one unit increase in the characteristic. For categorical characteristics,  $\beta$  is the  
 175 change in mean EQ-VAS scores compared to the referent category.

176

177 **Table 2: Univariate cross-sectional associations between variables and mean EQ-VAS scores**  
 178 **for New Zealand Veterans (N=1,762)**

| Characteristic                      | <i>n</i> | $\beta$   | 95% CIs        | <i>p</i> -value |
|-------------------------------------|----------|-----------|----------------|-----------------|
| <b>Age*</b>                         | 1762     | -0.19     | [-0.24, -0.13] | <.01            |
| <b>Sex</b>                          |          |           |                |                 |
| Female                              | 220      | Reference | -              |                 |
| Male                                | 1520     | -0.65     | [-3.04, 1.73]  | .59             |
| <b>Ethnicity</b>                    |          |           |                |                 |
| NZ European                         | 1382     | Reference | -              |                 |
| Māori                               | 245      | 1.21      | [-1.00, 3.42]  |                 |
| Other                               | 140      | -2.95     | [-6.26, 0.36]  | 0.10            |
| <b>Service years*</b>               | 1670     | 0.19      | [0.11, 0.27]   | <.01            |
| <b>Deployment status</b>            |          |           |                |                 |
| Not deployed                        | 288      | Reference | -              |                 |
| Deployed                            | 1458     | 5.80      | [ 3.35, 8.25 ] | <.01            |
| <b>GHQ-12 score*</b>                | 1765     | -1.63     | [-1.79, -1.47] | <.01            |
| <b>Social support*</b>              |          |           |                |                 |
| Attachment                          | 1760     | 2.02      | [ 1.69, 2.34 ] | <.01            |
| Social integration                  | 1758     | 2.45      | [ 2.06, 2.88 ] | <.01            |
| Reassurance of worth                | 1756     | 2.48      | [ 2.11, 2.85 ] | <.01            |
| Reliable alliance                   | 1760     | 2.30      | [ 1.91, 2.70 ] | <.01            |
| Social guidance                     | 1760     | 2.00      | [ 1.65, 2.35 ] | <.01            |
| Opportunity for nurturance          | 1758     | 0.85      | [ 0.47, 1.23 ] | <.01            |
| Social support total score          | 1753     | 0.52      | [ 0.44, 0.59 ] | <.01            |
| <b>Psychological flexibility*</b>   | 1750     | 0.79      | [ 0.71, 0.87 ] | <.01            |
| <b>Sleep score*</b>                 | 1747     | 3.47      | [ 3.11, 3.83 ] | <.01            |
| <b>AUDIT-C</b>                      |          |           |                |                 |
| Non-hazardous                       |          | Reference | -              |                 |
| Hazardous                           |          | 0.62      | [-1.03, 2.26]  | 0.46            |
| <b>Exposure to traumatic events</b> |          |           |                |                 |
| Not exposed                         | 1754     | Reference | -              |                 |
| Exposed                             |          | -5.72     | [-7.34, -4.11] | <.01            |

179 \*Scored as continuous variables, coefficient is per unit increase.

180 Of the demographic variables, age was associated with lower EQ-VAS scores, length of  
 181 service with higher scores. No relationships were apparent for sex or ethnicity. Positive  
 182 coefficients, indicating better health with presence of the characteristic, were present for  
 183 dichotomous variables of deployment, where the mean EQ-VAS score for deployed Veterans  
 184 was 5.8 VAS units higher (better) than for non-deployed. The largest negative associations  
 185 were for exposure to traumatic events, with a mean EQ-VAS score 5.7 lower for those  
 186 exposed compared to those not exposed. Distress, as measured by the GHQ-12, had a  
 187 negative association with health state. Positive associations with health state were found for

1  
2 188 psychological flexibility as measured by the AAQ-II, better sleep scores, the total support  
3  
4 189 scores and the individual dimensions.

5  
6 190 Table 3 shows the results from two models. The first model is adjusted for the other  
7  
8 191 characteristics, with 11 variables and 1,557 people providing valid responses for all factors  
9  
10 192 included in the model. All effect sizes were reduced, and the social support and AUDIT-C  
11  
12 193 scores were no longer associated, with 11 variables explaining 35% of the variability in the  
13  
14 194 EQ-VAS.

15 195 The final model involved backward variable selection setting a p-value of 0.10, identifying a  
16  
17 196 smaller subset of variables. Age, sex, service years, and deployment status were retained in  
18  
19 197 the model irrespective of their p-values, thus adjusting for those variables, using 1,600  
20  
21 198 complete responses. Social support and AUDIT-C hazardous drinking were not retained in  
22  
23 199 this final model; other coefficients remaining essentially the same, with a minimal effect on  
24  
25 200 the overall  $R^2$ .

201 **Table 3. Multivariable models of associations between variables and mean EQ-VAS scores**  
 202 **for New Zealand Veterans**

| Characteristic                                  | Adjusted model, N used =1,557 |                |              | Final model, N used =1,600 |                |              |
|-------------------------------------------------|-------------------------------|----------------|--------------|----------------------------|----------------|--------------|
|                                                 | $\beta$                       | 95% CI         | p-value      | $\beta$                    | 95% CI         | p-value      |
| <b>Age (years)*</b>                             | 0.17                          | [-0.23, 1.11]  | <0.01        | -0.17                      | [-0.23, -0.12] | <0.01        |
| <b>Sex</b>                                      |                               |                |              |                            |                |              |
| Female                                          | <b>Ref</b>                    | -              | -            | <b>Ref</b>                 | -              | -            |
| Male                                            | 0.24                          | [-2.52, 2.03]  | 0.84         | -0.60                      | [-2.82, 1.63]  | 0.60         |
| <b>Ethnicity</b>                                |                               |                |              |                            |                |              |
| NZ European                                     | <b>Ref</b>                    | -              | -            | <b>Ref</b>                 | -              | -            |
| Māori                                           | 0.29                          | [-1.70, 2.27]  | 0.07         | 0.19                       | [-1.77, 2.14]  | -            |
| Other                                           | -3.58                         | [-6.66, -0.51] |              | -2.91                      | [-5.88, 0.06]  | 0.15         |
| <b>Service years*</b>                           | 0.17                          | [ 0.10, 0.25]  | <0.01        | 0.17                       | [ 0.10, 0.25]  | <0.01        |
| <b>Deployment status</b>                        |                               |                |              |                            |                |              |
| Not deployed                                    | <b>Ref</b>                    | -              | -            | <b>Ref</b>                 | -              | -            |
| Deployed                                        | 2.91                          | [ 0.64, 5.18]  | <0.05        | 2.90                       | [ 0.65, 5.15]  | 0.01         |
| <b>GHQ12 score*</b>                             | -0.87                         | [-1.09, -0.65] | <0.01        | -0.92                      | [-1.13, -0.71] | <0.01        |
| <b>Social support (SPS score)*</b>              | 0.01                          | [-0.07, 0.10]  | 0.76         | -                          | -              | -            |
| <b>Psychological flexibility score (AAQii)*</b> | 0.26                          | [ 0.15, 0.37]  | <0.01        | 0.24                       | [ 0.14, 0.35]  | <0.01        |
| <b>Sleep score (SCI), Range 0-10*</b>           | 1.60                          | [ 1.18, 2.02]  | <0.01        | 1.63                       | [ 1.22, 2.05]  | <0.01        |
| <b>AUDIT_C score</b>                            |                               |                |              |                            |                |              |
| Non hazardous                                   | <b>Ref</b>                    | -              | -            | -                          | -              | -            |
| Hazardous                                       | 0.41                          | [-1.00, 1.81]  | 0.57         | -                          | -              | -            |
| <b>Exposure to traumatic events (BTQ)</b>       |                               |                |              |                            |                |              |
| Not exposed                                     | <b>Ref</b>                    | -              | -            | <b>Ref</b>                 | -              | -            |
| Exposed                                         | -1.77                         | [-3.30, -0.24] | <0.05        | -1.81                      | [-3.32, 0.30]  | 0.02         |
|                                                 |                               |                | $R^2 = 0.35$ |                            |                | $R^2 = 0.36$ |

203 \*Scored as continuous variables, coefficient is per unit increase.

## 204 DISCUSSION

### 205 *Principal findings*

206 With the exception of anxiety or depression, Veterans had a significantly greater proportion  
 207 of 'any problem' responses in the EQ-5D dimensions than the general population of New  
 208 Zealand.

209 The final model identified variables independently associated with the EQ-VAS score: age,  
 210 length of service, deployment, the GHQ score, psychological flexibility, the sleep score and  
 211 exposure to traumatic events. The results make conceptual sense in that distress is associated  
 212 with reduced EQ-VAS and psychological flexibility with a modest protective effect, however,  
 213 and unusually, Social Support was dropped, however the SPS was found to have a significant  
 214 correlation with distress, and collinearity was the problem. There are also known to be many

1  
2 215 other influences on health, including 'social wellbeing',[5] financial status, personality and  
3  
4 216 non-deployment related stressors,[23] which we have not measured.

5  
6 217 *Strengths and weaknesses*

7 218 Strengths of our study were the relatively large sample size, the inclusion of all Veterans, the  
8  
9 219 assessment of 'health', infrequently investigated in Veteran populations, and the inclusion of  
10  
11 220 New Zealand Veterans with a range of characteristics, including 'deployed' and 'non-  
12  
13 221 deployed' Veterans. As a measure of health, the EQ-5D-5L dimensions and EQ-VAS ask about  
14  
15 222 health on the day that respondents complete the questionnaire, the EQ-VAS end points being,  
16  
17 223 respectively, the 'best' and 'worst' health they can imagine, so it is a holistic measure of health  
18  
19 224 state.[24]

20  
21 225 The response rate of 26% from serving Veterans, along with the unknown total number of  
22  
23 226 Veterans, raises the question of bias, the direction of which is difficult to assess, as  
24  
25 227 responses may be more likely from either Veterans with good or poor health. The healthy  
26  
27 228 soldier effect is well known, service having a positive effect on wellbeing, with serving NZ  
28  
29 229 Veterans having good access to primary health care through the military system, but the  
30  
31 230 public health care system is the primary pathway to care for all Veterans, who are also  
32  
33 231 covered by the 'no fault' accident compensation scheme for accidental injuries and  
34  
35 232 occupational diseases.[25] Deployed Veterans may be at an advantage, but are covered by  
36  
37 233 NZVA only if their illness or injury is linked to a particular deployment, and the condition is  
38  
39 234 listed on the 'Statements of Principle' of the Australian Repatriation Medical Authority.[26]  
40  
41 235 We also know that New Veterans tend to be stoic, so they might underestimate their health  
42  
43 236 concerns,[27] and there are likely to be other personal characteristics that we have not  
44  
45 237 measured. We were however able to adjust for deployment status, which did have a positive  
46  
47 238 association with health state. In the interest of minimising responder burden, we used brief  
48  
49 239 scales, which might reduce construct validity. Distress, sleep, psychological flexibility and  
50  
51 240 exposure to traumatic events are likely to be related, so collinearity was difficult to avoid.  
52  
53 241 The confounding effect was greatest for social support, but our finding does not mean that  
54  
55 242 social support is of no importance to Veterans. The precision of the other coefficients may  
56  
57 243 also have been affected. Finally, the cross-sectional design means that we cannot explore  
58  
59 244 cause and effect, so recommendations for future interventions require additional support  
60  
245 from longitudinal studies.

246 *Comparison with other studies*

1  
2 247 We have previously reported factors associated with post-traumatic stress in this group,[28]  
3  
4 248 using the Military Post Traumatic Stress Checklist (PCL-M). Factors associated with higher PCL-  
5  
6 249 M scores were trauma exposure, older age, male gender, and being of Māori ethnicity. Factors  
7  
8 250 associated with lower PCL-M scores were greater length of service, psychological flexibility,  
9  
10 251 and better quality sleep. Using health as the outcome disclosed that Māori did not have poorer  
11  
12 252 self-reported health compared to non-Māori, that deployment had a positive effect, and in  
13  
14 253 the univariate models, all of the dimensions of social support were associated with improved  
15  
16 254 health. The final model also included good sleep and psychological flexibility, providing most  
17  
18 255 of the explanatory power in the model.  
19  
20 256 No other studies appear to have used the EQ-VAS as an outcome measure for Veteran health.  
21  
22 257 Boehmer et al.[29] examined wellbeing among participants in the 2000 Behavioural Risk  
23  
24 258 Factor Surveillance System describing health-related quality of life (HRQoL) by sex and military  
25  
26 259 status, active duty, reservists Veterans, or no military service. Participants were asked to rate  
27  
28 260 recent physical health, mental health, and activity limitation. Active duty men were more likely  
29  
30 261 than men without military service to report 14 or more days of activity limitation, pain, and  
31  
32 262 not enough rest in the past 30 days, the mobility and pain findings being similar to our sample.  
33  
34 263 Notably, the predominant reason for medical discharge from the British Armed Forces was  
35  
36 264 musculoskeletal problems.[30]  
37  
38 265 Contrary to our finding on deployment, there are reports indicating that non-deployed  
39  
40 266 personnel retain better health than those who have been deployed,[31] Diaz Santana et al.  
41  
42 267 having carried out a cross-sectional survey of 60,000 U.S. Veterans of Afghanistan and Iraq,  
43  
44 268 with 20,563 responses. In contrast to our finding, mental quality of life scores were higher  
45  
46 269 among the non-deployed group compared to the deployed group, though the deployed group  
47  
48 270 reported higher physical quality of life scores compared to the non-deployed. Again in  
49  
50 271 contrast, both mental and physical quality of life were lower among Veterans compared to  
51  
52 272 U.S. population norms.  
53  
54 273 Both positive and negative consequences of deployment have been described.[7,32] In a study  
55  
56 274 of Dutch Veterans,[7] two out of three reported a positive effect of deployment on their  
57  
58 275 quality of life at the time of the survey, this being related to positive feelings such as  
59  
60 276 satisfaction or comradeship, but a few having emotions such as frustration or shame. As  
277 regards tangible effects,[32] negative consequences included the military 'chain of command',  
being away from home, and deterioration of marital/significant other relationships. Positive  
influences include improved financial security, self-improvement, and time to reflect.



1  
2 280 We found sleep to be associated with better health, but sleep difficulties are a common  
3  
4 281 symptom for those with PTSD. McCarthy et al.[33] reported on the 3,157 U.S. military  
5  
6 282 Veterans enrolled in the National Health and Resilience in Veterans Study, in which 27.6%  
7  
8 283 reported poor sleep quality. Path analyses revealed significant associations between poor  
9  
10 284 sleep, severity of PTSD, poorer mental and physical health functioning and lower overall  
11  
12 285 quality of life.

### 13 286 *Future directions*

14  
15 287 The results suggest that distress, psychological flexibility, and sleep have an important  
16  
17 288 relationship with self-rated health among Veterans in this study.

18  
19 289 Reducing distress through the promotion of psychological flexibility might be possible,  
20  
21 290 although our finding here must be subject to caution as several researchers argue that the  
22  
23 291 AAQ-II may be measuring psychological distress and affect rather than psychological  
24  
25 292 inflexibility.[34] Psychological flexibility is specifically targeted by ACT, a psychological  
26  
27 293 intervention described as being in the ‘third wave’ of behaviour change strategies.[35] The six  
28  
29 294 core processes of ACT (acceptance, cognitive defusion, being present, self as context, values,  
30  
31 295 and committed action) aim to increase psychological flexibility, the goal being “to have clients  
32  
33 296 experience the world more directly so that their behavior is more flexible and thus their  
34  
35 297 actions more consistent with the values that they hold.”[35] Approaches such as ACT may  
36  
37 298 therefore improve health state and has been shown to improve pain acceptance and  
38  
39 299 psychological flexibility [36]. Lang et al. carried out a randomised clinical trial (RCT), comparing  
40  
41 300 ACT with person-centred therapy,[37] showing a general improvement in symptoms of  
42  
43 301 distress across both treatment arms, ACT providing superior improvement in insomnia. The  
44  
45 302 drop-out rate for both therapies was however high, and the two groups did not exhibit any  
46  
47 303 change in psychological flexibility. The authors proposed that future studies should include  
48  
49 304 additional measures of ACT processes to determine which are actually affected by ACT.

50  
51 305 Sleep in military personnel has been recognised as a ‘vital health behaviour’ for which policies  
52  
53 306 and guidelines must be developed.[38] Cognitive behavioural therapy for insomnia (CBT-I) is  
54  
55 307 regarded as an effective ‘first line’ treatment, and a brief intervention has been described for  
56  
57 308 use in Australian general practice.[39] The Lang et al. trial[37] showed CBT-I to be effective,  
58  
59 309 however future studies should include outcome measures that include ACT processes. Our  
60  
310 final model showed that distress had a negative association with health, and psychological  
311 flexibility had a positive relationship, with sleep most likely related to both of these variables.  
312 It would seem important to screen for these conditions prior to transition from the military,

1  
2 313 as well as among retired Veterans, in order to provide targeted support. Further research is  
3  
4 314 needed to examine the potential of CBT to improve Veterans' wellbeing.

5  
6 315 Figure 1 Caption.

7 316 **The proportion of Veterans reporting 'any problem' with each of the EQ-5D-5L dimension**  
8  
9 317 **scores compared to the NZ population normative proportions**

## 11 318 REFERENCES

- 12  
13  
14 319 1. McLaughlin R, Nielsen L, Waller M. An Evaluation of the Effect of Military Service on  
15  
16 320 Mortality: Quantifying the Healthy Soldier Effect. *Ann Epidemiol*. 2008;18(2):928-936.  
17  
18 321 2. Bollinger MJ, Schmidt S, Pugh JA et al. Erosion of the healthy soldier effect in Veterans  
19  
20 322 of US military service in Iraq and Afghanistan. *Popul Health Metr*. 2015;13:8.  
21  
22 323 3. Kimberley A, Andersen KA, Grimshaw PN et al. Musculoskeletal Lower Limb Injury Risk  
23  
24 324 in Army Populations. *Sports Med-Open* 2016;2:22. DOI 10.1186/s40798-016-0046-z.  
25  
26 325 4. Hoge CW, Castro CA, Messer SC et al. Combat duty in Iraq and Afghanistan, mental  
27  
28 326 health problems, and barriers to care. *N Engl J Med*. 2004;351(1):13–22.  
29  
30 327 5. Oster C, Morello A, Venning A et al. The health and wellbeing needs of Veterans: a  
31  
32 328 rapid review. *BMC Psychiatry*. 2017;17(1):414.  
33  
34 329 6. Spiro A, 3rd, Settersten RA, Aldwin CM. Long-term Outcomes of Military Service in  
35  
36 330 Aging and the Life Course: A Positive Re-envisioning. *Gerontologist*. 2016;56(1):5-13.  
37  
38 331 7. Duel J and Reijnen A. The long term effects of military deployment and their relation  
39  
40 332 with the quality of life of Dutch Veterans. *Mil Behav Heal*. 2021;9(2):160-169.  
41  
42 333 8. Pedlar D, Thompson JM, Castro CA. Military Veteran reintegration. Military-to-civilian  
43  
44 334 transition theories and frameworks. In: Castro C, Dursun S, editors. *Military Veteran*  
45  
46 335 *reintegration, approach, management, and assessment of military Veterans*  
47  
48 336 *transitioning to civilian life*. San Diego: Academic Press; 2019. 257p.  
49  
50 337 9. Veterans Support Act (NZ) 2014. [cited 2020 28 August] Available:  
51  
52 338 <https://www.legislation.govt.nz/act/public/2014/0056/latest/whole.html>.  
53  
54 339 10. New Zealand Government. Briefing to the Incoming Minister for Veterans. Wellington:  
55  
56 340 New Zealand Veteran's Affairs; 2020. [cited 2020 28 August] Available from:  
57  
58 341 <https://www.beehive.govt.nz/sites/default/files/2020-12/Veteran%20Affairs.pdf>.  
59  
60 342 11. Royal New Zealand Returned and Services Association [internet]. [cited 2022 2  
343  
344 February] Available: <https://www.rsa.org.nz/>.  
12. NoDuff. [Internet]. [cited 2022 2 February] <https://www.noduff.org/>.

13. EuroQol Research Foundation. EQ-5D-5L User Guide [Internet]. Rotterdam: EuroQol Research Foundation; 2021. [cited 2022 2 February]. Available from: <https://euroqol.org/eq-5d-instruments/eq-5d-5l-about/>.
14. Health Information Standards Organisation. Ethnicity data protocols. Wellington: Ministry of Health; 2017. Standard No.: HISO 10001:2017.
15. Goldberg D.P. The Detection of Psychiatric Illness by Questionnaire. Maudsley Monograph No. 21. London: Oxford University Press; 1972.
16. Barrera, M., Jr. and Ainlay, S.L. The structure of social support: a conceptual and empirical analysis. *J Comm Psychol*. 1983;11(2):133-43.
17. Bush K, Kivlahan DR, McDonell MB et al. The AUDIT alcohol consumption questions (AUDIT-C): an effective brief screening test for problem drinking. Ambulatory Care Quality Improvement Project (ACQUIP). Alcohol Use Disorders Identification Test. *Arch Intern Med*. 1998;158(16):1789-95.
18. Espie CA, Kyle SD, Hames P, Gardani M et al. The Sleep Condition Indicator: a clinical screening tool to evaluate insomnia disorder. *BMJ Open*. 2014;4(3): e004183.
19. American Psychiatric Association. Diagnostic and Statistical Manual of Mental Disorders (DSM-5). Fifth edition. Washington DC: American Psychiatric Association 2013. 991p.
20. Schnurr PP, Spiro A, Vielhauer MJ, et al. Trauma in the Lives of Older Men: Findings from the Normative Aging Study. *Journal of Clinical Geropsychology*. 2002;8(3):175-87.
21. Bond FW, Hayes SC, Baer RA et al. Preliminary psychometric properties of the Acceptance and Action Questionnaire-II: a revised measure of psychological inflexibility and experiential avoidance. *Behav Therapy*. 2011;42(4): 676-688.
22. Sullivan T, Hansen P, Ombler F, et al. (2020) A new tool for creating personal and social EQ-5D-5L value sets, including valuing 'dead'. *Soc Sci Med*. 2020; 246:112707.
23. Brooks SK, Greenberg N. Non-deployment factors affecting psychological wellbeing in military personnel: literature review. *J Ment Health*. 2018;27(1):80-90.
24. Feng Y, Parkin D, Devlin NJ. Assessing the performance of the EQ-VAS in the NHS PROMs programme. *Qual Life Res*. 2014;23(3):977-89.
25. Accident Compensation Corporation. Homepage [Internet] Wellington: Accident Compensation Corporation 2022 [cited 2022 Feb 16] Available from: <https://www.acc.co.nz/>.

- 1  
2 378 26. Repatriation Medical Authority. Statements of Principle [Internet]. Canberra ACT:  
3  
4 379 Repatriation Medical Authority 2022 [cited 2022 Feb 16] Available from:  
5  
6 380 <http://www.rma.gov.au/sops/>.  
7  
8 381 27. Austin G, Calvert Toby, Fasi N, et al. Soldiering on only goes so far: How a qualitative  
9  
10 382 study on Veteran loneliness in New Zealand influenced that support during COVID-19  
11  
12 383 lockdown. *Journal of Military, Veteran and Family Health*. 2020;6(S2):60-69.  
13  
14 384 28. Richardson A, Gurung G, Samaranayaka A, et al. Risk and protective factors for post-  
15  
16 385 traumatic stress among New Zealand military personnel: A cross sectional study. *PLoS*  
17  
18 386 *One*. 2020;15(4):e0231460.  
19  
20 387 29. Boehmer TK, Boothe VL, Flanders WD et al. Health-related quality of life of U.S. military  
21  
22 388 personnel: a population-based study. *Mil Med*. 2003;168(11):941-7.  
23  
24 389 30. Williamson V, Diehle J, Dunn R, et al. The impact of military service on health and well-  
25  
26 390 being. *Occup Med (Lond)*. 2019;69(1):64-70.  
27  
28 391 31. Diaz Santana MV, Eber S, Barth S, Cypel Y et al. Health-Related Quality of Life Among  
29  
30 392 U.S. Veterans of Operation Enduring Freedom and Operation Iraqi Freedom-Results  
31  
32 393 From a Population-Based Study. *Mil Med*. 2017;182(11):e1885-e91.  
33  
34 394 32. Newby JH, McCarroll JE, Ursano RJ, et al. Positive and negative consequences of a  
35  
36 395 military deployment. *Mil Med*. 2005;170(10):815-9.  
37  
38 396 33. McCarthy E, DeViva JC, Norman SB, et al. Self-assessed sleep quality partially mediates  
39  
40 397 the relationship between PTSD symptoms and functioning and quality of life in U.S.  
41  
42 398 Veterans: Results from the National Health and Resilience in Veterans Study. *Psychol*  
43  
44 399 *Trauma*. 2019;11(8):869-76.  
45  
46 400 34. Wolgast M. What does the Acceptance and Action Questionnaire (AAQ-II) really  
47  
48 401 measure? *Behav Ther*. 2014;45(6):831-839.  
49  
50 402 35. Hayes SC, Luoma JB, Bond FW, Masuda A, Lillis J. Acceptance and commitment  
51  
52 403 therapy: model, processes and outcomes. *Behav Res Ther*. 2006;44(1):1-25.  
53  
54 404 36. Hughes LS, Clark J, Colclough JA, Dale E, McMillan D. Acceptance and Commitment  
55  
56 405 Therapy (ACT) for Chronic Pain: A Systematic Review and Meta-Analyses. *Clin J Pain*.  
57  
58 406 2017 Jun;33(6):552-568. doi: 10.1097/AJP.0000000000000425. PMID: 27479642.  
59  
60 407 37. Lang AJ, Schnurr PP, Jain S, He F, Walser RD, Bolton E, et al. Randomized controlled  
408  
409 409 trial of acceptance and commitment therapy for distress and impairment in  
OEF/OIF/OND Veterans. *Psychol Trauma*. 2017;9(Suppl 1):74-84.

- 1  
2 410 38. Troxel WM et al. Sleep in the Military: Promoting Healthy Sleep Among U.S.  
3  
4 411 Servicemembers. RAND Corporation, 2015[cited 2021 August 28]. Available from:  
5  
6 412 [https://www.rand.org/content/dam/rand/pubs/research\\_reports/RR700/RR739/RA](https://www.rand.org/content/dam/rand/pubs/research_reports/RR700/RR739/RAND_RR739.pdf)  
7  
8 413 [ND\\_RR739.pdf](https://www.rand.org/content/dam/rand/pubs/research_reports/RR700/RR739/RAND_RR739.pdf).  
9  
10 414 39. Sweetman A et al. A step-by-step model for a brief behavioural treatment for  
11  
12 415 insomnia in Australian general practice. Aust J Gen Pract. 2021;50(5):287–293.  
13  
14 416

15  
16  
17  
18  
19  
20  
21  
22  
23  
24  
25  
26  
27  
28  
29  
30  
31  
32  
33  
34  
35  
36  
37  
38  
39  
40  
41  
42  
43  
44  
45  
46  
47  
48  
49  
50  
51  
52  
53  
54  
55  
56  
57  
58  
59  
60

For peer review only

## 417 **DATA SHARING STATEMENT**

418 Data from this study is unsuitable for public deposition due to the privacy of participant data.  
419 Data are anonymised, but contain information on deployments (including location and  
420 duration), which could lead to some participants being identified. Furthermore, the  
421 participant information sheet, as required by the Southern Health and Disability Ethics  
422 Committee specifically contains the statement that 'all study data would be kept strictly  
423 confidential to the research team.' Qualified researchers may apply for data access with the  
424 research team at veterans.health@otago.ac.nz and/or hdecs@moh.govt.nz.

## 425 **FUNDING**

426 This work was supported by a research grant from the Ministerial Veterans Health Advisory  
427 Panel, funded through the War Pensions Medical Research Trust Fund (grant number not  
428 applicable), also by Lottery Health (grant number LHR-2017-49146) and the Royal New  
429 Zealand Returned and Services Association (grant number not applicable).

## 430 **COMPETING INTERESTS**

431 None declared.

## 432 **CONTRIBUTION**

433 **Investigation:** Amy Richardson, Emma H. Wyeth, Sarah Derrett, Daniel Shepherd, David  
434 McBride.

435 **Methodology:** Amy Richardson, Ari Samaranayaka, Dianne Gardner, Emma H. Wyeth, Sarah  
436 Derrett, David McBride, Daniel Shepherd.

437 **Project administration:** Amy Richardson.

438 **Resources:** Brandon de Graaf.

439 **Software:** Brandon de Graaf.

440 **Supervision:** Ari Samaranayaka.

441 **Validation:** Amy Richardson.

442 **Visualization:** Amy Richardson.

443 **Writing – original draft:** David McBride. AS, DG, EHW, SD and DS contributed to the re-writes  
444 and final draft.

## 445 **ACKNOWLEDGEMENTS**

446 We would like to thank Shane Harvey for his input into the initial design, Aidan Smith, previous  
447 research advisor to the NZDF, for steering us through the consents process, also the members

1  
2 448 of our steering group: COL Clare Bennett (NZDF); Ms Marti Eller (New Zealand Veterans  
3  
4 449 Affairs); Mark Compain, Danny Nelson and Richard Terrill (RSA); and NoDuff representatives  
5  
6 450 Aaron Wood and Lars Millar.  
7  
8 451 Finally, a thank you to the New Zealand Veterans who took the time and effort to complete a  
9  
10 452 rather tedious questionnaire. Kia Kaha.  
11  
12  
13  
14  
15  
16  
17  
18  
19  
20  
21  
22  
23  
24  
25  
26  
27  
28  
29  
30  
31  
32  
33  
34  
35  
36  
37  
38  
39  
40  
41  
42  
43  
44  
45  
46  
47  
48  
49  
50  
51  
52  
53  
54  
55  
56  
57  
58  
59  
60

For peer review only

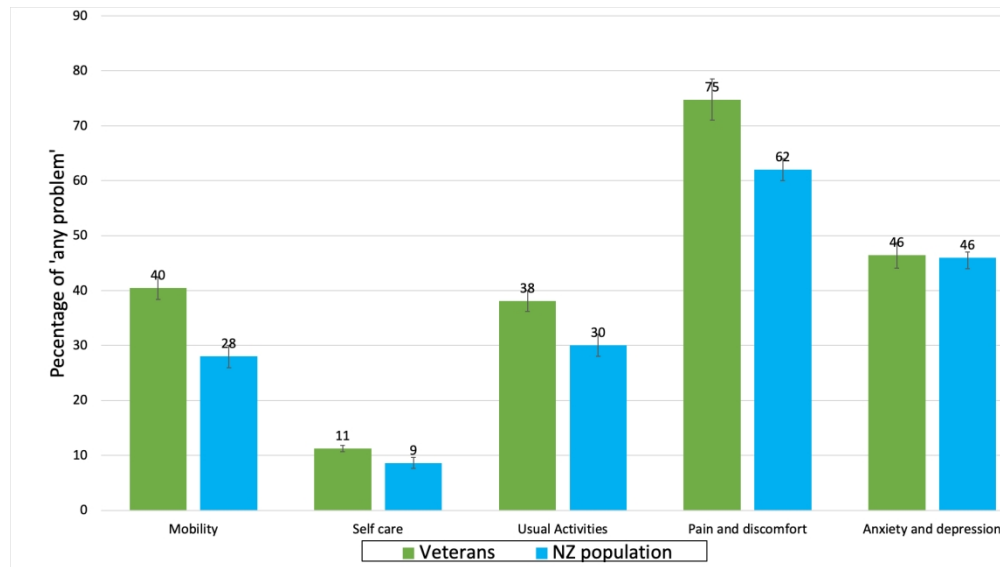

The proportion of Veterans reporting 'any problem' with each of the EQ-5D-5L dimension scores compared to the NZ population normative proportions

338x190mm (144 x 144 DPI)



# BMJ Open

## Factors associated with self-reported health among New Zealand military Veterans: A cross-sectional study

|                                 |                                                                                                                                                                                                                                                                                                                                                                                                                                                                                                                                                                                                                                                                                                                                        |
|---------------------------------|----------------------------------------------------------------------------------------------------------------------------------------------------------------------------------------------------------------------------------------------------------------------------------------------------------------------------------------------------------------------------------------------------------------------------------------------------------------------------------------------------------------------------------------------------------------------------------------------------------------------------------------------------------------------------------------------------------------------------------------|
| Journal:                        | <i>BMJ Open</i>                                                                                                                                                                                                                                                                                                                                                                                                                                                                                                                                                                                                                                                                                                                        |
| Manuscript ID                   | bmjopen-2021-056916.R1                                                                                                                                                                                                                                                                                                                                                                                                                                                                                                                                                                                                                                                                                                                 |
| Article Type:                   | Original research                                                                                                                                                                                                                                                                                                                                                                                                                                                                                                                                                                                                                                                                                                                      |
| Date Submitted by the Author:   | n/a                                                                                                                                                                                                                                                                                                                                                                                                                                                                                                                                                                                                                                                                                                                                    |
| Complete List of Authors:       | McBride, David; University of Otago Dunedin School of Medicine, Department of Preventive and Social Medicine<br>Samaranayaka, Ariyapala; University of Otago Division of Health Sciences, Biostatistics Centre<br>Richardson, Amy; University of Otago Dunedin School of Medicine, Preventive and Social Medicine<br>Gardner, D; Massey University, Department of Psychology<br>Shepherd, Daniel; Auckland University of Technology, Health Sciences<br>Wyeth, Emma; University of Otago, Ngāi Tahu Māori Health Research Unit<br>de Graaf, Brandon; University of Otago Dunedin School of Medicine, Injury Prevention Research Unit<br>Derrett, Sarah; University of Otago Dunedin School of Medicine, Preventive and Social Medicine |
| <b>Primary Subject Heading</b>: | Epidemiology                                                                                                                                                                                                                                                                                                                                                                                                                                                                                                                                                                                                                                                                                                                           |
| Secondary Subject Heading:      | Occupational and environmental medicine, Public health                                                                                                                                                                                                                                                                                                                                                                                                                                                                                                                                                                                                                                                                                 |
| Keywords:                       | EPIDEMIOLOGY, OCCUPATIONAL & INDUSTRIAL MEDICINE, Health & safety < HEALTH SERVICES ADMINISTRATION & MANAGEMENT, Risk management < HEALTH SERVICES ADMINISTRATION & MANAGEMENT, MENTAL HEALTH, Musculoskeletal disorders < ORTHOPAEDIC & TRAUMA SURGERY                                                                                                                                                                                                                                                                                                                                                                                                                                                                                |

SCHOLARONE™  
Manuscripts

For peer review only - <http://bmjopen.bmj.com/site/about/guidelines.xhtml>

For peer review only - <http://bmjopen.bmj.com/site/about/guidelines.xhtml>

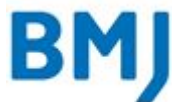

I, the Submitting Author has the right to grant and does grant on behalf of all authors of the Work (as defined in the below author licence), an exclusive licence and/or a non-exclusive licence for contributions from authors who are: i) UK Crown employees; ii) where BMJ has agreed a CC-BY licence shall apply, and/or iii) in accordance with the terms applicable for US Federal Government officers or employees acting as part of their official duties; on a worldwide, perpetual, irrevocable, royalty-free basis to BMJ Publishing Group Ltd ("BMJ") its licensees and where the relevant Journal is co-owned by BMJ to the co-owners of the Journal, to publish the Work in this journal and any other BMJ products and to exploit all rights, as set out in our [licence](#).

The Submitting Author accepts and understands that any supply made under these terms is made by BMJ to the Submitting Author unless you are acting as an employee on behalf of your employer or a postgraduate student of an affiliated institution which is paying any applicable article publishing charge ("APC") for Open Access articles. Where the Submitting Author wishes to make the Work available on an Open Access basis (and intends to pay the relevant APC), the terms of reuse of such Open Access shall be governed by a Creative Commons licence – details of these licences and which [Creative Commons](#) licence will apply to this Work are set out in our licence referred to above.

Other than as permitted in any relevant BMJ Author's Self Archiving Policies, I confirm this Work has not been accepted for publication elsewhere, is not being considered for publication elsewhere and does not duplicate material already published. I confirm all authors consent to publication of this Work and authorise the granting of this licence.

1  
2  
3 **FACTORS ASSOCIATED WITH SELF-REPORTED HEALTH AMONG NEW ZEALAND MILITARY**  
4 **VETERANS: A CROSS-SECTIONAL STUDY**  
5

6 David McBride,<sup>1</sup> Ari Samaranayaka<sup>2</sup>, Amy Richardson,<sup>1</sup> Dianne Gardner,<sup>3</sup> Daniel Shepherd,<sup>4</sup>  
7  
8 Emma H. Wyeth<sup>5</sup>, Brandon deGraaf,<sup>6</sup> Sarah Derrett.<sup>1</sup>  
9

10  
11 <sup>1</sup>Department of Preventive and Social Medicine, Dunedin School of Medicine, University of  
12 Otago, New Zealand.

13  
14 <sup>2</sup>Biostatistics Centre, Division of Health Sciences, University of Otago, Dunedin, New Zealand.

15  
16 <sup>3</sup>School of Psychology, Massey University, New Zealand.

17  
18 <sup>4</sup>Department of Psychology, Auckland University of Technology, New Zealand.

19  
20 <sup>5</sup>Ngāi Tahu Māori Health Research Unit, Department of Preventive and Social Medicine,  
21 Dunedin School of Medicine, University of Otago, New Zealand.

22  
23 <sup>6</sup>Injury Prevention Research Unit, Department of Preventive and Social Medicine, Dunedin  
24 School of Medicine, University of Otago, New Zealand.

25  
26 **Keywords:**

27 Military Medicine

28 Quality of Life

29 Risk Factors

30 Protective Factors

31 Point Prevalence  
32  
33  
34  
35

36 **Word count**

37 2959  
38  
39

40 **Corresponding Author:**

41  
42 David McBride, Department of Preventive and Social Medicine, Adams Building, 18 Frederick  
43 Street, Dunedin 9017, New Zealand.

44  
45 Email: [david.mcbride@otago.ac.nz](mailto:david.mcbride@otago.ac.nz)

46  
47 Phone: +64 3 479 7208

48  
49 Fax: +64 3 479 7298  
50  
51  
52  
53  
54  
55  
56  
57  
58  
59  
60

## 1 **ABSTRACT**

### 2 **Objective**

3 To identify factors associated with better or poorer self-reported health status in New Zealand  
4 military Veterans.

### 5 **Design**

6 An online cross-sectional survey.

### 7 **Participants**

8 The participants of interest were the 3,874 currently serving Veterans who had been deployed  
9 to a conflict zone, but all Veterans were eligible to participate.

### 10 **Study variables**

11 Health status was self-reported using the EQ-5D-5L, which asks about problems across five  
12 dimensions (mobility, self-care, usual activities, pain or discomfort, and anxiety or  
13 depression), with five levels of severity (e.g. no, slight, moderate, severe or extreme  
14 problems), also containing a visual analogue scale (EQ-VAS), scaled from 0 (worst) to 100  
15 (best) imagined health. Hypothetical relationships with better health were positive social  
16 support, sleep and psychological flexibility; with poorer health, exposure to psychological  
17 trauma, distress and hazardous drinking.

### 18 **Results:**

19 The EQ5-D was completed by 1767 Veterans, 1009 serving, a response rate of 26% from that  
20 group, with 1767 completing the EQ5-D and entering the analysis, comprising 1458 who had  
21 deployed, 288 who had not, and the 21 who did not provide deployment data.

22 A significantly higher proportion of Veterans reported 'any problems' rather than 'no  
23 problems' with four EQ-5D dimensions: mobility, self-care, usual activities and pain or  
24 discomfort, but no difference in anxiety or depression. Age, length of service, deployment,  
25 psychological flexibility and better sleep quality were associated with higher EQ-VAS scores;  
26 distress with lower EQ-VAS scores.

### 27 **Conclusion:**

28 In this sample of New Zealand Veterans, psychological flexibility and good sleep are associated  
29 with better self-rated health, and distress and poor sleep with diminished health. These  
30 factors might be used as sentinel health indicators in assessing Veteran health status. As  
31 distress, psychological flexibility and sleep are closely related, cognitive behavioural therapy  
32 encompassing these domains may be useful in improving the health of New Zealand Veterans.

### 33 **Keywords:**

34 Self-rated health, wellbeing, EQ-5D, Veterans, deployment, military, risk factors.

## 35 **Strengths and limitations of this study**

- 36 • Many studies of Veterans have focused on adverse outcomes, but we have been able  
37 to focus on a holistic measure of 'health'.
- 38 • The study was sufficiently powered to detect important relationships indicating  
39 opportunities for intervention.
- 40 • The exact response rate is unknown, and bias may be a limitation.
- 41 • The cross-sectional design means that we cannot explore cause and effect  
42 relationships.

## 43 **INTRODUCTION**

44 The three major events in the military life course are entry to military service, deployment on  
45 active service and transition back to civilian life. On entry, soldiers, sailors and air personnel  
46 are subject to a selection process to ensure, as far as possible, good physical and mental  
47 health, giving rise to the 'healthy soldier effect,' with service personnel being, on average,  
48 healthier than the general population.[1] However, the physical and psychological stressors  
49 of military service have been found to erode this effect.[2]

50 The physical stressors have a particular impact on the lower limb, with load carriage, high  
51 intensity training and the design of footwear being implicated in injury causation.[3] A military  
52 career also increases opportunities for psychological trauma, and post-traumatic stress  
53 disorder (PTSD) has been identified as the 'signature injury' of United States service men and  
54 women deployed to Afghanistan and Iraq.[4]

55 A focus on adverse health events in the literature[5] means that wellbeing is relatively  
56 overlooked. In the long run, military service has been found to have positive effects.[6,7]

57 Good health after service does, however, depend on the success of the 'military civilian  
58 transition', a complex process for which models have been developed.[8] Health problems  
59 developed in service, difficulty in assuming a post-service identity and many other factors  
60 contribute to health and wellbeing outcomes.[8] In New Zealand, military Veterans can only  
61 access assistance from New Zealand Veteran's Affairs (NZVA) if they have undertaken  
62 'qualifying operational service' as defined by the Veteran Support Act 2014,[9] thus being  
63 Veterans in a legal sense. NZVA support some 12,000 Veterans, with an average age of 80  
64 years, 5000 being actively case managed.[10] The majority will have seen operational service  
65 in Korea, Borneo, Malaya and Vietnam. Post-Vietnam, smaller numbers deployed on United  
66 Nations and other missions, but the tempo of operations rose with the deployment to  
67 Bosnia in 1992, and some 9,000-10,000 'legal' Veterans deployed between then and the

1  
2 68 withdrawal of New Zealand troops from Afghanistan in 2021. The Ministerial Veteran's  
3  
4 69 Health Advisory Panel, established under the Veteran Support Act, are specifically charged  
5  
6 70 with funding research on this 'contemporary Veteran' group, NZVA acknowledging that they  
7  
8 71 "have had different experiences, and have different needs, compared to the older veterans.  
9  
10 72 They are likely to have served in a number of deployments during their career, and come to  
11  
12 73 us with more complex health issues." [10]

13 74 The aims of this study were therefore to describe self-reported health among these Veterans,  
14  
15 75 and identify factors associated with better or poorer health.

## 16 76 **Veteran and public involvement**

17 77 The Ministerial Veterans Health Advisory Panel, [10] commissioned the study and advised on  
18  
19 78 the design. We also formed a steering group with representatives from the New Zealand  
20  
21 79 Defence Force, New Zealand Veterans Affairs, the Royal New Zealand Returned and Services  
22  
23 80 Association (RSA) [11] and No Duff, [12] a charity providing first response support to Veterans  
24  
25 81 and their families. We also consulted with the Ngāi Tahu Research Consultation Committee in  
26  
27 82 order to assess the importance of the project to Māori, New Zealand's indigenous population.  
28  
29 83 We undertook to inform the Veteran community before releasing the results, also to give all  
30  
31 84 Veterans, defined as anyone who had served in the military, an opportunity to participate.

## 32 85 **METHODS**

### 33 86 **Participants**

34  
35 87 Data were collected via an online survey, a postal version being available on request. There is  
36  
37 88 no comprehensive Veteran registry, however in July 2018, a link to the online questionnaire  
38  
39 89 was sent by email to all currently serving regular and reserve New Zealand Defence Force  
40  
41 90 (NZDF) members registered on the NZDF email system who were 'legal Veterans', as indicated  
42  
43 91 by holding the New Zealand Operational Service Medal, numbering 3,874 personnel at that  
44  
45 92 time. An introductory message and link to the questionnaire were also presented on the NZDF  
46  
47 93 'intranet landing page', a secure internal webpage from which all regular force personnel can  
48  
49 94 access relevant work-related content, tools, and resources. Retired military personnel were  
50  
51 95 invited to participate through posters distributed to reserve units and the 43 local social clubs  
52  
53 96 identified by the RSA national office to be 'Veteran active.' Paper questionnaires with return  
54  
55 97 postage envelopes were made available at these sites. Announcements were also made on  
56  
57 98 military social media pages, and both retired and currently serving personnel were invited to  
58  
59 99 participate through an announcement on the No Duff website. The questionnaire was  
60

1  
2 100 available for completion from June to December 2018. Ethics approval for the study was  
3  
4 101 obtained from the Northern B Health and Disability Ethics Committee, reference 17NTB118.

5  
6 102 **Questionnaire**

7  
8 103 *Criterion variable*

9  
10 104 Self-rated health status was assessed using the EQ-5D-5L,[13] a short questionnaire asking  
11  
12 105 about the respondent's health across five dimensions: mobility, self-care, usual activities, pain  
13  
14 106 or discomfort and anxiety or depression, with response options ranging from (e.g.) 'no  
15  
16 107 problems', to 'extreme problems'. For each dimension, participants were categorised as  
17  
18 108 having 'any problems' if they selected any response other than 'no problems'.

19 109 Additionally, the EQ-5D-5L visual analogue scale (EQ-VAS) asks the respondent to mark on a  
20  
21 110 vertical visual analogue scale (VAS) how good or bad their health is today, where the  
22  
23 111 endpoints are labelled 'the best health you can imagine' (score of 100) and 'the worst health  
24  
25 112 you can imagine' (score of 0).

26 113 *Independent variables*

27  
28 114 Demographic characteristics included age, sex, ethnicity, service years, and past deployment  
29  
30 115 on operational service (yes/no). Ethnicity prioritisation was adopted,[14] whereby  
31  
32 116 participants with multiple responses were assigned to one of the categories, in the order of  
33  
34 117 Māori, Pacific Peoples, Other and European.

35 118 General psychiatric morbidity was assessed using the 12-item General Health Questionnaire  
36  
37 119 (GHQ-12),[15] scored using a four point scale (0-3) and summing the 12 items to give a total  
38  
39 120 score, with higher scores indicating elevated distress.

40  
41 121 Social support was measured using the Social Provisions Scale,[16] with responses made on a  
42  
43 122 four-point Likert-type scale ranging from 1 'strongly disagree' to 4 'strongly agree'. The 24  
44  
45 123 items can be reduced to six subscales (attachment, social integration, reassurance of worth,  
46  
47 124 reliable alliance, social guidance, opportunity for nurturance) or summed to create a total  
48  
49 125 score, with greater scores indicating greater social support.

50 126 Alcohol use was measured using the AUDIT-C,[17] scaled from 0-12. A score of 3+ for women  
51  
52 127 and 4+ for men indicated potentially hazardous drinking behaviour.

53 128 Sleep quality was assessed with the Sleep Condition Indicator (SCI), [18] assessing insomnia as  
54  
55 129 described in the Diagnostic and Statistical Manual of Mental Disorders version 5 (DSM-V).[19]

56  
57 130 The SCI consists of eight items rated from 0-4, the total scores being scaled to a range of 0 to  
58  
59 131 10, where higher scores represent better sleep.

1  
2 132 Trauma exposure was assessed with the Brief Trauma Scale (BTS),[20] which captures past  
3  
4 133 exposure to situations that were life threatening or capable of producing serious injury.  
5  
6 134 Psychological flexibility was measured with the 10-item AAQ-II, designed as a measure of  
7  
8 135 effectiveness in a particular mode of behavioural intervention, Acceptance and Commitment  
9  
10 136 Therapy (ACT).[21] Items were answered on a 7-point scale, with options ranging from 'never  
11  
12 137 true' to 'always true'. The items were summed to obtain a total score (possible range 10 to  
13  
14 138 70), with higher scores indicative of greater psychological flexibility.

### 15 139 **Statistical analyses**

16  
17 140 With respect to the calculation of summed scores, if only one item was missing for a particular  
18  
19 141 measure then this was imputed with the mean of the remaining items; if more than one item  
20  
21 142 was missing then the score was set to missing for that participant. Complete case analysis was  
22  
23 143 used in the remaining analyses. The five dimensions of the EQ-5D-5L were compared to the  
24  
25 144 NZ population normative values.[22]  
26  
27 145 Z tests were used to compare the EQ5D dimension scores with those of the New Zealand  
28  
29 146 general population.[22] Univariate ordinary least-squares linear regression analyses assessed  
30  
31 147 the strength of relationships between each independent variable and EQ-VAS scores, using  
32  
33 148 robust standard errors to account for heteroscedasticity and calculating 95% confidence  
34  
35 149 intervals (95% CIs). Multivariable linear regression was then used to identify the role of the  
36  
37 150 independent variables while adjusting for each other. None of the social support sub-scales  
38  
39 151 were used in this multivariable model, instead using the social support total score. The model  
40  
41 152 was built using backward variable selection with  $p < 0.10$  for variable retention, with the  
42  
43 153 exceptions of age, sex, service years, and deployment status which were retained as adjusting  
44  
45 154 variables irrespective of p-values.

## 45 155 **RESULTS**

46  
47 156 The EQ-5D was completed by 1767 Veterans, 1009 who were serving (26% of that group), 458  
48  
49 157 who had retired, 288 who had not deployed, and 21 who did not provide deployment data.  
50  
51 158 There are no reliable denominator data on retired and non-deployed Veterans in New  
52  
53 159 Zealand.  
54  
55 160 A supplementary table presents the EQ-VAS score according to the sample characteristics.  
56  
57 161 Figure 1 shows the proportion of EQ-5D-5L dimension responses reporting 'any problem'  
58  
59 162 severity level other than 'no problems' in comparison to the New Zealand population  
60  
163 normative values,[22] with table 1 showing the 95% CI's and Z values.

164 **Figure 1 about here**



165 Table 1, Proportion of 'any problem' in EQ-5D domains

| Domain             | Veterans            | NZ population       | Z value (p)  |
|--------------------|---------------------|---------------------|--------------|
|                    | Proportion (95% CI) | Proportion (95% CI) |              |
| Mobility           | 0.40 (0.38-0.42)    | 0.28 (0.26-0.30)    | 8.5 (<.0001) |
| Self-care          | 0.11 (0.10-0.12)    | 0.09 (0.07-0.10)    | 2.8 (0.03)   |
| Usual activities   | 0.38 (0.36-0.40)    | 0.30 (0.28-0.31)    | 5.6 (<.001)  |
| Pain/discomfort    | 0.75 (0.73-0.76)    | 0.62 (0.60-0.63)    | 9.0 (<.0001) |
| Anxiety/depression | 0.46 (0.44-0.48)    | 0.46 (0.44-0.48)    | 0 (1)        |

166

167 The results of the univariate analysis are displayed in Table 2. Here, for continuous  
 168 characteristics, the regression coefficient ( $\beta$ ) represents the change in the mean EQ-VAS  
 169 associated with one unit increase in the characteristic. For categorical characteristics,  $\beta$  is the  
 170 change in mean EQ-VAS scores compared to the referent category.

171

172 **Table 2: Univariate cross-sectional associations between variables and mean EQ-VAS scores**  
 173 **for New Zealand Veterans (N=1,762)**

| Characteristic                      | n    | $\beta$   | 95% CIs        | p-value |
|-------------------------------------|------|-----------|----------------|---------|
| <b>Age*</b>                         | 1762 | -0.19     | [-0.24, -0.13] | <.01    |
| <b>Sex</b>                          |      |           |                |         |
| Female                              | 220  | Reference | -              |         |
| Male                                | 1520 | -0.65     | [-3.04, 1.73]  | .59     |
| <b>Ethnicity</b>                    |      |           |                |         |
| NZ European                         | 1382 | Reference | -              |         |
| Māori                               | 245  | 1.21      | [-1.00, 3.42]  |         |
| Other                               | 140  | -2.95     | [-6.26, 0.36]  | 0.10    |
| <b>Service years*</b>               | 1670 | 0.19      | [0.11, 0.27]   | <.01    |
| <b>Deployment status</b>            |      |           |                |         |
| Not deployed                        | 288  | Reference | -              |         |
| Deployed                            | 1458 | 5.80      | [ 3.35, 8.25 ] | <.01    |
| <b>GHQ-12 score*</b>                | 1765 | -1.63     | [-1.79, -1.47] | <.01    |
| <b>Social support*</b>              |      |           |                |         |
| Attachment                          | 1760 | 2.02      | [ 1.69, 2.34 ] | <.01    |
| Social integration                  | 1758 | 2.45      | [ 2.06, 2.88 ] | <.01    |
| Reassurance of worth                | 1756 | 2.48      | [ 2.11, 2.85 ] | <.01    |
| Reliable alliance                   | 1760 | 2.30      | [ 1.91, 2.70 ] | <.01    |
| Social guidance                     | 1760 | 2.00      | [ 1.65, 2.35 ] | <.01    |
| Opportunity for nurturance          | 1758 | 0.85      | [ 0.47, 1.23 ] | <.01    |
| Social support total score          | 1753 | 0.52      | [ 0.44, 0.59 ] | <.01    |
| <b>Psychological flexibility*</b>   | 1750 | 0.79      | [ 0.71, 0.87 ] | <.01    |
| <b>Sleep score*</b>                 | 1747 | 3.47      | [ 3.11, 3.83 ] | <.01    |
| <b>AUDIT-C</b>                      |      |           |                |         |
| Non-hazardous                       |      | Reference | -              |         |
| Hazardous                           |      | 0.62      | [-1.03, 2.26]  | 0.46    |
| <b>Exposure to traumatic events</b> | 1754 |           |                |         |
| Not exposed                         |      | Reference | -              |         |
| Exposed                             |      | -5.72     | [-7.34, -4.11] | <.01    |

\*Scored as continuous variables, coefficient is per unit increase.

175 Of the demographic variables, age was associated with lower EQ-VAS scores, length of  
 176 service with higher scores. No relationships were apparent for sex or ethnicity. Positive  
 177 coefficients, indicating better health with presence of the characteristic, were present for  
 178 dichotomous variables of deployment, where the mean EQ-VAS score for deployed Veterans  
 179 was 5.8 VAS units higher (better) than for non-deployed. The largest negative associations  
 180 were for exposure to traumatic events, with a mean EQ-VAS score 5.7 lower for those  
 181 exposed compared to those not exposed. Distress, as measured by the GHQ-12, had a  
 182 negative association with health state. Positive associations with health state were found for

1  
2 183 psychological flexibility as measured by the AAQ-II, better sleep scores, the total support  
3  
4 184 scores and the individual dimensions.

5 185 Table 3 shows the results from two models. The first model is adjusted for the other  
6  
7 186 characteristics, with 11 variables and 1,557 people providing valid responses for all factors  
8  
9 187 included in the model. All effect sizes were reduced, and the social support and AUDIT-C  
10  
11 188 scores were no longer associated, with 11 variables explaining 35% of the variability in the  
12  
13 189 EQ-VAS.

14  
15 190 The final model involved backward variable selection setting a p-value of 0.10, identifying a  
16  
17 191 smaller subset of variables. Age, sex, service years, and deployment status were retained in  
18  
19 192 the model irrespective of their p-values, thus adjusting for those variables, using 1,600  
20  
21 193 complete responses. Social support and AUDIT-C hazardous drinking were not retained in  
22  
23 194 this final model; other coefficients remaining essentially the same, with a minimal effect on  
24  
25 195 the overall  $R^2$ .

196 **Table 3. Multivariable models of associations between variables and mean EQ-VAS scores**  
 197 **for New Zealand Veterans**

| Characteristic                                  | Adjusted model, N used =1,557 |                |              | Final model, N used =1,600 |                |              |
|-------------------------------------------------|-------------------------------|----------------|--------------|----------------------------|----------------|--------------|
|                                                 | $\beta$                       | 95% CI         | p-value      | $\beta$                    | 95% CI         | p-value      |
| <b>Age (years)*</b>                             | 0.17                          | [-0.23, 1.11]  | <0.01        | -0.17                      | [-0.23, -0.12] | <0.01        |
| <b>Sex</b>                                      |                               |                |              |                            |                |              |
| Female                                          | <b>Ref</b>                    | -              | -            | <b>Ref</b>                 | -              | -            |
| Male                                            | 0.24                          | [-2.52, 2.03]  | 0.84         | -0.60                      | [-2.82, 1.63]  | 0.60         |
| <b>Ethnicity</b>                                |                               |                |              |                            |                |              |
| NZ European                                     | <b>Ref</b>                    | -              | -            | <b>Ref</b>                 | -              | -            |
| Māori                                           | 0.29                          | [-1.70, 2.27]  | 0.07         | 0.19                       | [-1.77, 2.14]  | -            |
| Other                                           | -3.58                         | [-6.66, -0.51] |              | -2.91                      | [-5.88, 0.06]  | 0.15         |
| <b>Service years*</b>                           | 0.17                          | [ 0.10, 0.25]  | <0.01        | 0.17                       | [ 0.10, 0.25]  | <0.01        |
| <b>Deployment status</b>                        |                               |                |              |                            |                |              |
| Not deployed                                    | <b>Ref</b>                    | -              | -            | <b>Ref</b>                 | -              | -            |
| Deployed                                        | 2.91                          | [ 0.64, 5.18]  | <0.05        | 2.90                       | [0.65, 5.15]   | 0.01         |
| <b>GHQ12 score*</b>                             | -0.87                         | [-1.09, -0.65] | <0.01        | -0.92                      | [-1.13, -0.71] | <0.01        |
| <b>Social support (SPS score)*</b>              | 0.01                          | [-0.07, 0.10]  | 0.76         | -                          | -              | -            |
| <b>Psychological flexibility score (AAQii)*</b> | 0.26                          | [ 0.15, 0.37]  | <0.01        | 0.24                       | [0.14, 0.35]   | <0.01        |
| <b>Sleep score (SCI), Range 0-10*</b>           | 1.60                          | [ 1.18, 2.02]  | <0.01        | 1.63                       | [1.22, 2.05]   | <0.01        |
| <b>AUDIT_C score</b>                            |                               |                |              |                            |                |              |
| Non hazardous                                   | <b>Ref</b>                    | -              | -            | -                          | -              | -            |
| Hazardous                                       | 0.41                          | [-1.00, 1.81]  | 0.57         | -                          | -              | -            |
| <b>Exposure to traumatic events (BTQ)</b>       |                               |                |              |                            |                |              |
| Not exposed                                     | <b>Ref</b>                    | -              | -            | <b>Ref</b>                 | -              | -            |
| Exposed                                         | -1.77                         | [-3.30, -0.24] | <0.05        | -1.81                      | [-3.32, 0.30]  | 0.02         |
|                                                 |                               |                | $R^2 = 0.35$ |                            |                | $R^2 = 0.36$ |

198 \*Scored as continuous variables, coefficient is per unit increase.

## 199 DISCUSSION

### 200 *Principal findings*

201 With the exception of anxiety or depression, Veterans had a significantly greater proportion  
 202 of 'any problem' responses in the EQ-5D dimensions than the general population of New  
 203 Zealand.

204 The final model identified variables independently associated with the EQ-VAS score: age,  
 205 length of service, deployment, the GHQ score, psychological flexibility, the sleep score and  
 206 exposure to traumatic events. The results make conceptual sense in that distress is associated  
 207 with reduced EQ-VAS and psychological flexibility with a modest protective effect, however,  
 208 and unusually, Social Support was dropped, however the SPS was found to have a significant  
 209 correlation with distress, and collinearity was the problem. There are also known to be many

1  
2 210 other influences on health, including 'social wellbeing',[5] financial status, personality and  
3  
4 211 non-deployment related stressors,[23] which we have not measured.

5  
6 212 *Strengths and weaknesses*

7 213 Strengths of our study were the relatively large sample size, the inclusion of all Veterans, the  
8  
9 214 assessment of 'health', infrequently investigated in Veteran populations, and the inclusion of  
10  
11 215 New Zealand Veterans with a range of characteristics, including 'deployed' and 'non-  
12  
13 216 deployed' Veterans. As a measure of health, the EQ-5D-5L dimensions and EQ-VAS ask about  
14  
15 217 health on the day that respondents complete the questionnaire, the EQ-VAS end points being,  
16  
17 218 respectively, the 'best' and 'worst' health they can imagine, so it is a holistic measure of health  
18  
19 219 state.[24]

20  
21 220 The response rate of 26% from serving Veterans, along with the unknown total number of  
22  
23 221 Veterans, raises the question of bias, the direction of which is difficult to assess, as  
24  
25 222 responses may be more likely from either Veterans with good or poor health. The healthy  
26  
27 223 soldier effect is well known, service having a positive effect on wellbeing, with serving NZ  
28  
29 224 Veterans having good access to primary health care through the military system, but the  
30  
31 225 public health care system is the primary pathway to care for all Veterans, who are also  
32  
33 226 covered by the 'no fault' accident compensation scheme for accidental injuries and  
34  
35 227 occupational diseases.[25] Deployed Veterans may be at an advantage, but are covered by  
36  
37 228 NZVA only if their illness or injury is linked to a particular deployment, and the condition is  
38  
39 229 listed on the 'Statements of Principle' of the Australian Repatriation Medical Authority.[26]  
40  
41 230 We also know that New Veterans tend to be stoic, so they might underestimate their health  
42  
43 231 concerns,[27] and there are likely to be other personal characteristics that we have not  
44  
45 232 measured. We were however able to adjust for deployment status, which did have a positive  
46  
47 233 association with health state. In the interest of minimising responder burden, we used brief  
48  
49 234 scales, which might reduce construct validity. Distress, sleep, psychological flexibility and  
50  
51 235 exposure to traumatic events are likely to be related, so collinearity was difficult to avoid.  
52  
53 236 The confounding effect was greatest for social support, but our finding does not mean that  
54  
55 237 social support is of no importance to Veterans. The precision of the other coefficients may  
56  
57 238 also have been affected. Finally, the cross-sectional design means that we cannot explore  
58  
59 239 cause and effect, so recommendations for future interventions require additional support  
60  
240 from longitudinal studies.

241 *Comparison with other studies*

1  
2 242 We have previously reported factors associated with post-traumatic stress in this group,[28]  
3  
4 243 using the Military Post Traumatic Stress Checklist (PCL-M). Factors associated with higher PCL-  
5  
6 244 M scores were trauma exposure, older age, male gender, and being of Māori ethnicity. Factors  
7  
8 245 associated with lower PCL-M scores were greater length of service, psychological flexibility,  
9  
10 246 and better quality sleep. Using health as the outcome disclosed that Māori did not have poorer  
11  
12 247 self-reported health compared to non-Māori, that deployment had a positive effect, and in  
13  
14 248 the univariate models, all of the dimensions of social support were associated with improved  
15  
16 249 health. The final model also included good sleep and psychological flexibility, providing most  
17  
18 250 of the explanatory power in the model.  
19  
20 251 No other studies appear to have used the EQ-VAS as an outcome measure for Veteran health.  
21  
22 252 Boehmer et al.[29] examined wellbeing among participants in the 2000 Behavioural Risk  
23  
24 253 Factor Surveillance System describing health-related quality of life (HRQoL) by sex and military  
25  
26 254 status, active duty, reservists Veterans, or no military service. Participants were asked to rate  
27  
28 255 recent physical health, mental health, and activity limitation. Active duty men were more likely  
29  
30 256 than men without military service to report 14 or more days of activity limitation, pain, and  
31  
32 257 not enough rest in the past 30 days, the mobility and pain findings being similar to our sample.  
33  
34 258 Notably, the predominant reason for medical discharge from the British Armed Forces was  
35  
36 259 musculoskeletal problems.[30]  
37  
38 260 Contrary to our finding on deployment, there are reports indicating that non-deployed  
39  
40 261 personnel retain better health than those who have been deployed,[31] Diaz Santana et al.  
41  
42 262 having carried out a cross-sectional survey of 60,000 U.S. Veterans of Afghanistan and Iraq,  
43  
44 263 with 20,563 responses. In contrast to our finding, mental quality of life scores were higher  
45  
46 264 among the non-deployed group compared to the deployed group, though the deployed group  
47  
48 265 reported higher physical quality of life scores compared to the non-deployed. Again in  
49  
50 266 contrast, both mental and physical quality of life were lower among Veterans compared to  
51  
52 267 U.S. population norms.  
53  
54 268 Both positive and negative consequences of deployment have been described.[7,32] In a study  
55  
56 269 of Dutch Veterans,[7] two out of three reported a positive effect of deployment on their  
57  
58 270 quality of life at the time of the survey, this being related to positive feelings such as  
59  
60 271 satisfaction or comradeship, but a few having emotions such as frustration or shame. As  
272 regards tangible effects,[32] negative consequences included the military 'chain of command',  
273 being away from home, and deterioration of marital/significant other relationships. Positive  
274 influences include improved financial security, self-improvement, and time to reflect.

1  
2 275 We found sleep to be associated with better health, but sleep difficulties are a common  
3  
4 276 symptom for those with PTSD. McCarthy et al.[33] reported on the 3,157 U.S. military  
5  
6 277 Veterans enrolled in the National Health and Resilience in Veterans Study, in which 27.6%  
7  
8 278 reported poor sleep quality. Path analyses revealed significant associations between poor  
9  
10 279 sleep, severity of PTSD, poorer mental and physical health functioning and lower overall  
11  
12 280 quality of life.

### 13 281 *Future directions*

14  
15 282 The results suggest that distress, psychological flexibility, and sleep have an important  
16  
17 283 relationship with self-rated health among Veterans in this study.

18  
19 284 Reducing distress through the promotion of psychological flexibility might be possible,  
20  
21 285 although our finding here must be subject to caution as several researchers argue that the  
22  
23 286 AAQ-II may be measuring psychological distress and affect rather than psychological  
24  
25 287 inflexibility.[34] Psychological flexibility is specifically targeted by ACT, a psychological  
26  
27 288 intervention described as being in the ‘third wave’ of behaviour change strategies.[35] The six  
28  
29 289 core processes of ACT (acceptance, cognitive defusion, being present, self as context, values,  
30  
31 290 and committed action) aim to increase psychological flexibility, the goal being “to have clients  
32  
33 291 experience the world more directly so that their behavior is more flexible and thus their  
34  
35 292 actions more consistent with the values that they hold.”[35] Approaches such as ACT may  
36  
37 293 therefore improve health state and has been shown to improve pain acceptance and  
38  
39 294 psychological flexibility [36]. Lang et al. carried out a randomised clinical trial (RCT), comparing  
40  
41 295 ACT with person-centred therapy,[37] showing a general improvement in symptoms of  
42  
43 296 distress across both treatment arms, ACT providing superior improvement in insomnia. The  
44  
45 297 drop-out rate for both therapies was however high, and the two groups did not exhibit any  
46  
47 298 change in psychological flexibility. The authors proposed that future studies should include  
48  
49 299 additional measures of ACT processes to determine which are actually affected by ACT.

50  
51 300 Sleep in military personnel has been recognised as a ‘vital health behaviour’ for which policies  
52  
53 301 and guidelines must be developed.[38] Cognitive behavioural therapy for insomnia (CBT-I) is  
54  
55 302 regarded as an effective ‘first line’ treatment, and a brief intervention has been described for  
56  
57 303 use in Australian general practice.[39] The Lang et al. trial[37] showed CBT-I to be effective,  
58  
59 304 however future studies should include outcome measures that include ACT processes. Our  
60  
305 final model showed that distress had a negative association with health, and psychological  
306 flexibility had a positive relationship, with sleep most likely related to both of these variables.  
307 It would seem important to screen for these conditions prior to transition from the military,

1  
2 308 as well as among retired Veterans, in order to provide targeted support. Further research is  
3  
4 309 needed to examine the potential of CBT to improve Veterans' wellbeing.

5  
6 310 Figure 1 Caption.

7 311 **The proportion of Veterans reporting 'any problem' with each of the EQ-5D-5L dimension**  
8  
9 312 **scores compared to the NZ population normative proportions**

## 11 313 REFERENCES

- 12  
13  
14 314 1. McLaughlin R, Nielsen L, Waller M. An Evaluation of the Effect of Military Service on  
15 315 Mortality: Quantifying the Healthy Soldier Effect. *Ann Epidemiol.* 2008;18(2):928-936.  
16  
17 316 2. Bollinger MJ, Schmidt S, Pugh JA et al. Erosion of the healthy soldier effect in Veterans  
18  
19 317 of US military service in Iraq and Afghanistan. *Popul Health Metr.* 2015;13:8.  
20  
21 318 3. Kimberley A, Andersen KA, Grimshaw PN et al. Musculoskeletal Lower Limb Injury Risk  
22  
23 319 in Army Populations. *Sports Med-Open* 2016;2:22. DOI 10.1186/s40798-016-0046-z.  
24  
25 320 4. Hoge CW, Castro CA, Messer SC et al. Combat duty in Iraq and Afghanistan, mental  
26 321 health problems, and barriers to care. *N Engl J Med.* 2004;351(1):13–22.  
27  
28 322 5. Oster C, Morello A, Venning A et al. The health and wellbeing needs of Veterans: a  
29 323 rapid review. *BMC Psychiatry.* 2017;17(1):414.  
30  
31 324 6. Spiro A, 3rd, Settersten RA, Aldwin CM. Long-term Outcomes of Military Service in  
32 325 Aging and the Life Course: A Positive Re-envisioning. *Gerontologist.* 2016;56(1):5-13.  
33  
34 326 7. Duel J and Reijnen A. The long term effects of military deployment and their relation  
35 327 with the quality of life of Dutch Veterans. *Mil Behav Heal.* 2021;9(2):160-169.  
36  
37 328 8. Pedlar D, Thompson JM, Castro CA. Military Veteran reintegration. Military-to-civilian  
38 329 transition theories and frameworks. In: Castro C, Dursun S, editors. *Military Veteran*  
39 330 *reintegration, approach, management, and assessment of military Veterans*  
40 331 *transitioning to civilian life.* San Diego: Academic Press; 2019. 257p.  
41  
42 332 9. Veterans Support Act (NZ) 2014. [cited 2020 28 August] Available:  
43 333 <https://www.legislation.govt.nz/act/public/2014/0056/latest/whole.html>.  
44  
45 334 10. New Zealand Government. Briefing to the Incoming Minister for Veterans. Wellington:  
46 335 New Zealand Veteran's Affairs; 2020. [cited 2020 28 August] Available from:  
47 336 <https://www.beehive.govt.nz/sites/default/files/2020-12/Veteran%20Affairs.pdf>.  
48  
49 337 11. Royal New Zealand Returned and Services Association [internet]. [cited 2022 2  
50 338 February] Available: <https://www.rsa.org.nz/>.  
51  
52 339 12. NoDuff. [Internet]. [cited 2022 2 February] <https://www.noduff.org/>.



- 1  
2 340 13. EuroQol Research Foundation. EQ-5D-5L User Guide [Internet]. Rotterdam: EuroQol  
3  
4 341 Research Foundation; 2021. [cited 2022 2 February]. Available from:  
5  
6 342 <https://euroqol.org/eq-5d-instruments/eq-5d-5l-about/>.
- 7  
8 343 14. Health Information Standards Organisation. Ethnicity data protocols. Wellington:  
9  
10 344 Ministry of Health; 2017. Standard No.: HISO 10001:2017.
- 11  
12 345 15. Goldberg D.P. The Detection of Psychiatric Illness by Questionnaire. Maudsley  
13  
14 346 Monograph No. 21. London: Oxford University Press; 1972.
- 15  
16 347 16. Barrera, M., Jr. and Ainlay, S.L. The structure of social support: a conceptual and  
17  
18 348 empirical analysis. *J Comm Psychol*. 1983;11(2):133-43.
- 19  
20 349 17. Bush K, Kivlahan DR, McDonell MB et al. The AUDIT alcohol consumption questions  
21  
22 350 (AUDIT-C): an effective brief screening test for problem drinking. Ambulatory Care  
23  
24 351 Quality Improvement Project (ACQUIP). Alcohol Use Disorders Identification Test. *Arch*  
25  
26 352 *Intern Med*. 1998;158(16):1789-95.
- 27  
28 353 18. Espie CA, Kyle SD, Hames P, Gardani M et al. The Sleep Condition Indicator: a clinical  
29  
30 354 screening tool to evaluate insomnia disorder. *BMJ Open*. 2014;4(3): e004183.
- 31  
32 355 19. American Psychiatric Association. Diagnostic and Statistical Manual of Mental  
33  
34 356 Disorders (DSM-5). Fifth edition. Washington DC: American Psychiatric Association  
35  
36 357 2013. 991p.
- 37  
38 358 20. Schnurr PP, Spiro A, Vielhauer MJ, et al. Trauma in the Lives of Older Men: Findings  
39  
40 359 from the Normative Aging Study. *Journal of Clinical Geropsychology*. 2002;8(3):175-  
41  
42 360 87.
- 43  
44 361 21. Bond FW, Hayes SC, Baer RA et al. Preliminary psychometric properties of the  
45  
46 362 Acceptance and Action Questionnaire-II: a revised measure of psychological  
47  
48 363 inflexibility and experiential avoidance. *Behav Therapy*. 2011;42(4): 676-688.
- 49  
50 364 22. Sullivan T, Hansen P, Ombler F, et al. (2020) A new tool for creating personal and social  
51  
52 365 EQ-5D-5L value sets, including valuing 'dead'. *Soc Sci Med*. 2020; 246:112707.
- 53  
54 366 23. Brooks SK, Greenberg N. Non-deployment factors affecting psychological wellbeing in  
55  
56 367 military personnel: literature review. *J Ment Health*. 2018;27(1):80-90.
- 57  
58 368 24. Feng Y, Parkin D, Devlin NJ. Assessing the performance of the EQ-VAS in the NHS  
59  
60 369 PROMs programme. *Qual Life Res*. 2014;23(3):977-89.
- 370  
371 372 25. Accident Compensation Corporation. Homepage [Internet] Wellington: Accident  
372  
373 Compensation Corporation 2022 [cited 2022 Feb 16] Available from:  
<https://www.acc.co.nz/>.

- 1  
2 373 26. Repatriation Medical Authority. Statements of Principle [Internet]. Canberra ACT:  
3  
4 374 Repatriation Medical Authority 2022 [cited 2022 Feb 16] Available from:  
5  
6 375 <http://www.rma.gov.au/sops/>.  
7  
8 376 27. Austin G, Calvert Toby, Fasi N, et al. Soldiering on only goes so far: How a qualitative  
9  
10 377 study on Veteran loneliness in New Zealand influenced that support during COVID-19  
11  
12 378 lockdown. *Journal of Military, Veteran and Family Health*. 2020;6(S2):60-69.  
13  
14 379 28. Richardson A, Gurung G, Samaranayaka A, et al. Risk and protective factors for post-  
15  
16 380 traumatic stress among New Zealand military personnel: A cross sectional study. *PLoS*  
17  
18 381 *One*. 2020;15(4):e0231460.  
19  
20 382 29. Boehmer TK, Boothe VL, Flanders WD et al. Health-related quality of life of U.S. military  
21  
22 383 personnel: a population-based study. *Mil Med*. 2003;168(11):941-7.  
23  
24 384 30. Williamson V, Diehle J, Dunn R, et al. The impact of military service on health and well-  
25  
26 385 being. *Occup Med (Lond)*. 2019;69(1):64-70.  
27  
28 386 31. Diaz Santana MV, Eber S, Barth S, Cypel Y et al. Health-Related Quality of Life Among  
29  
30 387 U.S. Veterans of Operation Enduring Freedom and Operation Iraqi Freedom-Results  
31  
32 388 From a Population-Based Study. *Mil Med*. 2017;182(11):e1885-e91.  
33  
34 389 32. Newby JH, McCarroll JE, Ursano RJ, et al. Positive and negative consequences of a  
35  
36 390 military deployment. *Mil Med*. 2005;170(10):815-9.  
37  
38 391 33. McCarthy E, DeViva JC, Norman SB, et al. Self-assessed sleep quality partially mediates  
39  
40 392 the relationship between PTSD symptoms and functioning and quality of life in U.S.  
41  
42 393 Veterans: Results from the National Health and Resilience in Veterans Study. *Psychol*  
43  
44 394 *Trauma*. 2019;11(8):869-76.  
45  
46 395 34. Wolgast M. What does the Acceptance and Action Questionnaire (AAQ-II) really  
47  
48 396 measure? *Behav Ther*. 2014;45(6):831-839.  
49  
50 397 35. Hayes SC, Luoma JB, Bond FW, Masuda A, Lillis J. Acceptance and commitment  
51  
52 398 therapy: model, processes and outcomes. *Behav Res Ther*. 2006;44(1):1-25.  
53  
54 399 36. Hughes LS, Clark J, Colclough JA, Dale E, McMillan D. Acceptance and Commitment  
55  
56 400 Therapy (ACT) for Chronic Pain: A Systematic Review and Meta-Analyses. *Clin J Pain*.  
57  
58 401 2017 Jun;33(6):552-568. doi: 10.1097/AJP.0000000000000425. PMID: 27479642.  
59  
60 402 37. Lang AJ, Schnurr PP, Jain S, He F, Walser RD, Bolton E, et al. Randomized controlled  
403  
404 404 trial of acceptance and commitment therapy for distress and impairment in  
OEF/OIF/OND Veterans. *Psychol Trauma*. 2017;9(Suppl 1):74-84.

- 1  
2 405 38. Troxel WM et al. Sleep in the Military: Promoting Healthy Sleep Among U.S.  
3  
4 406 Servicemembers. RAND Corporation, 2015[cited 2021 August 28]. Available from:  
5  
6 407 [https://www.rand.org/content/dam/rand/pubs/research\\_reports/RR700/RR739/RA](https://www.rand.org/content/dam/rand/pubs/research_reports/RR700/RR739/RAND_RR739.pdf)  
7  
8 408 [ND\\_RR739.pdf](https://www.rand.org/content/dam/rand/pubs/research_reports/RR700/RR739/RAND_RR739.pdf).  
9  
10 409 39. Sweetman A et al. A step-by-step model for a brief behavioural treatment for  
11 410 insomnia in Australian general practice. Aust J Gen Pract. 2021;50(5):287–293.  
12  
13 411  
14  
15  
16  
17  
18  
19  
20  
21  
22  
23  
24  
25  
26  
27  
28  
29  
30  
31  
32  
33  
34  
35  
36  
37  
38  
39  
40  
41  
42  
43  
44  
45  
46  
47  
48  
49  
50  
51  
52  
53  
54  
55  
56  
57  
58  
59  
60

## 412 DATA SHARING STATEMENT

413 Data from this study is unsuitable for public deposition due to the privacy of participant data.  
414 Data are anonymised, but contain information on deployments (including location and  
415 duration), which could lead to some participants being identified. Furthermore, the  
416 participant information sheet, as required by the Southern Health and Disability Ethics  
417 Committee specifically contains the statement that 'all study data would be kept strictly  
418 confidential to the research team.' Qualified researchers may apply for data access with the  
419 research team at veterans.health@otago.ac.nz and/or hdec@mh.govt.nz.

## 420 FUNDING

421 This work was supported by a research grant from the Ministerial Veterans Health Advisory  
422 Panel, funded through the War Pensions Medical Research Trust Fund, also by Lottery Health  
423 and the Royal New Zealand Returned and Services Association.

## 424 COMPETING INTERESTS

425 None declared.

## 426 CONTRIBUTION

427 **Investigation:** Amy Richardson, Emma H. Wyeth, Sarah Derrett, Daniel Shepherd, David  
428 McBride.

429 **Methodology:** Amy Richardson, Ari Samaranayaka, Dianne Gardner, Emma H. Wyeth, Sarah  
430 Derrett, David McBride. Daniel Shepherd

431 **Project administration:** Amy Richardson

432 **Resources:** Brandon de Graaf

433 **Software:** Brandon de Graaf

434 **Supervision:** Ari Samaranayaka

435 **Validation:** Amy Richardson

436 **Visualization:** Amy Richardson

437 **Writing – original draft:** David McBride. AS, DG, EHW, SD and DS contributed to the re-writes  
438 and final draft

## 439 ACKNOWLEDGEMENTS

440 We would like to thank Shane Harvey for his input into the initial design, Aidan Smith, previous  
441 research advisor to the NZDF, for steering us through the consents process, also the members  
442 of our steering group: COL Clare Bennett (NZDF); Ms Marti Eller (New Zealand Veterans

1  
2 443 Affairs); Mark Compain, Danny Nelson and Richard Terrill (RSA); and NoDuff representatives  
3  
4 444 Aaron Wood and Lars Millar.  
5  
6 445 Finally, a thank you to the New Zealand Veterans who took the time and effort to complete a  
7  
8 446 rather tedious questionnaire. Kia Kaha.  
9  
10  
11  
12  
13  
14  
15  
16  
17  
18  
19  
20  
21  
22  
23  
24  
25  
26  
27  
28  
29  
30  
31  
32  
33  
34  
35  
36  
37  
38  
39  
40  
41  
42  
43  
44  
45  
46  
47  
48  
49  
50  
51  
52  
53  
54  
55  
56  
57  
58  
59  
60

For peer review only

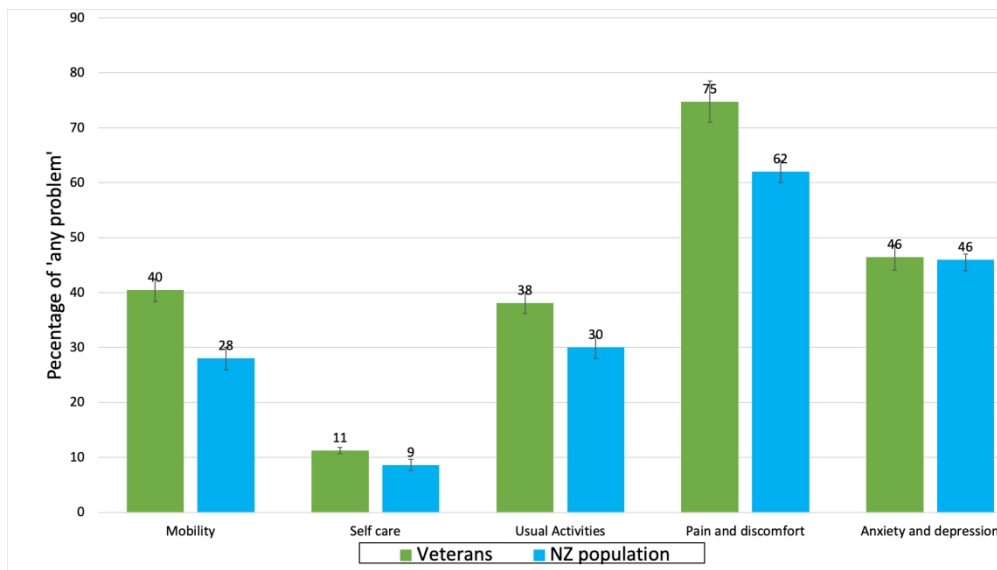

The proportion of Veterans reporting 'any problem' with each of the EQ-5D-5L dimension scores compared to the NZ population normative proportions

338x190mm (144 x 144 DPI)

STROBE Statement—Checklist of items that should be included in reports of *cross-sectional studies*

|                              | Item No | Recommendation                                                                                                                                                                                                                                                                                                                                                                                                                                                                              |
|------------------------------|---------|---------------------------------------------------------------------------------------------------------------------------------------------------------------------------------------------------------------------------------------------------------------------------------------------------------------------------------------------------------------------------------------------------------------------------------------------------------------------------------------------|
| <b>Title and abstract</b>    | 1       | Indicate the study's design with a commonly used term in the title or the abstract.<br><b>Yes, a cross sectional study, p1 title.</b><br>(b) Provide in the abstract an informative and balanced summary of what was done and what was found <b>Background, results and conclusions, p 1</b>                                                                                                                                                                                                |
| <b>Introduction</b>          |         |                                                                                                                                                                                                                                                                                                                                                                                                                                                                                             |
| Background/rationale         | 2       | Explain the scientific background and rationale for the investigation being reported<br><b>Introduction p2.</b>                                                                                                                                                                                                                                                                                                                                                                             |
| Objectives                   | 3       | State specific objectives, including any prespecified hypotheses <b>p2, lines 59 and 60</b>                                                                                                                                                                                                                                                                                                                                                                                                 |
| <b>Methods</b>               |         |                                                                                                                                                                                                                                                                                                                                                                                                                                                                                             |
| Study design                 | 4       | Present key elements of study design early in the paper <b>p2 line 62 to page 5 line 145</b>                                                                                                                                                                                                                                                                                                                                                                                                |
| Setting                      | 5       | Describe the setting, locations, and relevant dates, including periods of recruitment, exposure, follow-up, and data collection <b>Participants, page2 line 63- page 3 line 83.</b>                                                                                                                                                                                                                                                                                                         |
| Participants                 | 6       | (a) Give the eligibility criteria, and the sources and methods of selection of participants <b>page 2 line 64 to page 3, line 68.</b>                                                                                                                                                                                                                                                                                                                                                       |
| Variables                    | 7       | Clearly define all outcomes, exposures, predictors, potential confounders, and effect modifiers. Give diagnostic criteria, if applicable <b>Questionnaire, pp 3-5.</b>                                                                                                                                                                                                                                                                                                                      |
| Data sources/<br>measurement | 8*      | For each variable of interest, give sources of data and details of methods of assessment (measurement). Describe comparability of assessment methods if there is more than one group <b>as above</b>                                                                                                                                                                                                                                                                                        |
| Bias                         | 9       | Describe any efforts to address potential sources of bias <b>Methods, page 3. Lines 76-83.</b>                                                                                                                                                                                                                                                                                                                                                                                              |
| Study size                   | 10      | Explain how the study size was arrived at <b>p5 line 137</b>                                                                                                                                                                                                                                                                                                                                                                                                                                |
| Quantitative variables       | 11      | Explain how quantitative variables were handled in the analyses. If applicable, describe which groupings were chosen and why Cases defined through the <b>Multivariable logistic regression with the EQ-Visual analogue scale as the outcome measure, p5 lines 131-136</b>                                                                                                                                                                                                                  |
| Statistical methods          | 12      | (a) Describe all statistical methods, including those used to control for confounding <b>Backward elimination process p5 lines 134-135</b><br>(b) Describe any methods used to examine subgroups and interactions <b>By multivariable logistic regression, p5 as above</b><br>(c) Explain how missing data were addressed <b>p4 lines 122-125</b><br>(d) If applicable, describe analytical methods taking account of sampling strategy<br>N/A<br>(e) Describe any sensitivity analyses N/A |
| <b>Results</b>               |         |                                                                                                                                                                                                                                                                                                                                                                                                                                                                                             |
| Participants                 | 13*     | (a) Report numbers of individuals at each stage of study—eg numbers potentially eligible, examined for eligibility, confirmed eligible, included in the study, completing follow-up, and analysed <b>Potentially eligible lines 68-73 p 3</b><br>(b) Give reasons for non-participation at each stage N/A<br>(c) Consider use of a flow diagram N/A                                                                                                                                         |

|                                                              |                          |     |                                                                                                                                                                                                                                                                                                                                                                                                                                                                                                                                                                             |
|--------------------------------------------------------------|--------------------------|-----|-----------------------------------------------------------------------------------------------------------------------------------------------------------------------------------------------------------------------------------------------------------------------------------------------------------------------------------------------------------------------------------------------------------------------------------------------------------------------------------------------------------------------------------------------------------------------------|
| 1<br>2<br>3<br>4<br>5<br>6                                   | Descriptive data         | 14* | (a) Give characteristics of study participants (eg demographic, clinical, social) and information on exposures and potential confounders <b>page 5 et seq, table 1</b><br>(b) Indicate number of participants with missing data for each variable of interest ' <b>n used</b> ' columns <b>tables 2 and 3.</b>                                                                                                                                                                                                                                                              |
| 7                                                            | Outcome data             | 15* | Report numbers of outcome events or summary measures <b>as per tables</b>                                                                                                                                                                                                                                                                                                                                                                                                                                                                                                   |
| 8<br>9<br>10<br>11<br>12<br>13<br>14<br>15<br>16<br>17<br>18 | Main results             | 16  | (a) Give unadjusted estimates and, if applicable, confounder-adjusted estimates and their precision (eg, 95% confidence interval). Make clear which confounders were adjusted for and why they were included <b>Tables, adjusted for age, sex, service years and deployment status.</b><br>(b) Report category boundaries when continuous variables were categorized. <b>Independent variables, p 3 and 4, EQ-VAS is a continuous scale.</b><br>(c) If relevant, consider translating estimates of relative risk into absolute risk for a meaningful time period <b>N/A</b> |
| 19<br>20                                                     | Other analyses           | 17  | Report other analyses done—eg analyses of subgroups and interactions, and sensitivity analyses <b>N/A</b>                                                                                                                                                                                                                                                                                                                                                                                                                                                                   |
| 21                                                           | <b>Discussion</b>        |     |                                                                                                                                                                                                                                                                                                                                                                                                                                                                                                                                                                             |
| 22<br>23<br>24                                               | Key results              | 18  | Summarise key results with reference to study objectives <b>Discussion, p11 first para</b>                                                                                                                                                                                                                                                                                                                                                                                                                                                                                  |
| 25<br>26<br>27<br>28                                         | Limitations              | 19  | Discuss limitations of the study, taking into account sources of potential bias or imprecision. Discuss both direction and magnitude of any potential bias <b>Discussion lines 215 et seq.</b>                                                                                                                                                                                                                                                                                                                                                                              |
| 29<br>30<br>31<br>32                                         | Interpretation           | 20  | Give a cautious overall interpretation of results considering objectives, limitations, multiplicity of analyses, results from similar studies, and other relevant evidence <b>Discussion, p12 lines 230 et seq.</b>                                                                                                                                                                                                                                                                                                                                                         |
| 33<br>34<br>35                                               | Generalisability         | 21  | Discuss the generalisability (external validity) of the study results <b>p17, line 215 et seq.</b>                                                                                                                                                                                                                                                                                                                                                                                                                                                                          |
| 36                                                           | <b>Other information</b> |     |                                                                                                                                                                                                                                                                                                                                                                                                                                                                                                                                                                             |
| 37<br>38<br>39<br>40                                         | Funding                  | 22  | Give the source of funding and the role of the funders for the present study and, if applicable, for the original study on which the present article is based <b>Funding, p18</b>                                                                                                                                                                                                                                                                                                                                                                                           |

\*Give information separately for exposed and unexposed groups.

**Note:** An Explanation and Elaboration article discusses each checklist item and gives methodological background and published examples of transparent reporting. The STROBE checklist is best used in conjunction with this article (freely available on the Web sites of PLoS Medicine at <http://www.plosmedicine.org/>, Annals of Internal Medicine at <http://www.annals.org/>, and Epidemiology at <http://www.epidem.com/>). Information on the STROBE Initiative is available at [www.strobe-statement.org](http://www.strobe-statement.org).



Supplementary Table: Number of participants and EQ-VAS scores according to sample characteristics

| Exposure variable              | N (%)       | Mean (SD)   |
|--------------------------------|-------------|-------------|
| <b>All</b>                     | 1767        | 74.4 (17.1) |
| <b>Age group (years)</b>       |             |             |
| 20-29                          | 136 (7.7)   | 77.7 (14.4) |
| 30-39                          | 328 (18.6)  | 77.0 (16.2) |
| 40-49                          | 438 (24.8)  | 76.1 (14.6) |
| 50-59                          | 350 (19.8)  | 74.8 (16.6) |
| 60-69                          | 285 (16.1)  | 71.4 (19.8) |
| 70-79                          | 175 (9.9)   | 69.4 (19.4) |
| 80+                            | 50 (2.8)    | 66.2 (20.3) |
| Missing                        | 5 (0.3)     | 61.2 (22.1) |
| <b>Gender</b>                  |             |             |
| Female                         | 220 (12.5)  | 75.0 (16.9) |
| Male                           | 1520 (86.0) | 74.4 (17.2) |
| Missing                        | 27 (1.5)    | 70.3 (17.2) |
| <b>Ethnicity (prioritised)</b> |             |             |
| NZ European                    | 1382 (78.2) | 74.4 (17.1) |
| Māori                          | 245 (13.9)  | 75.6 (16.1) |
| Other                          | 140 (7.9)   | 71.5 (19.3) |
| <b>Service years</b>           |             |             |
| 0-9                            | 339 (19.2)  | 69.9 (19.7) |
| 10-19                          | 478 (27.1)  | 74.5 (17.9) |
| 20-29                          | 530 (30.0)  | 75.3 (15.9) |
| 30-39                          | 254 (14.4)  | 76.3 (14.6) |
| 40+                            | 69 (3.9)    | 75.4 (16.4) |
| Missing                        | 97 (5.5)    | 78.8 (14.2) |
| <b>Deployment (ever)</b>       |             |             |
| No                             | 288 (16.3)  | 69.5 (19.9) |
| Yes                            | 1458 (82.5) | 75.3 (16.4) |
| Missing                        | 21 (1.2)    | 75.6 (14.6) |
| <b>GHQ12 Score</b>             |             |             |
| 0-9                            | 652 (36.9)  | 82.0 (12.6) |
| 10-19                          | 972 (55.0)  | 72.3 (16.0) |
| 20-29                          | 123 (7.0)   | 54.3 (20.3) |
| 30+                            | 18 (1.0)    | 46.2 (24.4) |
| Missing                        | 2 (0.1)     | -           |

\*sub-scores not used in multivariable models.

## Supplementary table contd.

| <b>Social support full score</b>   |      |        |             |
|------------------------------------|------|--------|-------------|
| 24-29                              | 0    | 0      | -           |
| 30-39                              | 3    | (0.2)  | 66.7 (15.3) |
| 40-49                              | 15   | (0.8)  | 44.5 (22.5) |
| 50-59                              | 97   | (5.5)  | 62.4 (21.8) |
| 60-69                              | 351  | (19.9) | 69.0 (18.2) |
| 70-79                              | 643  | (36.4) | 75.1 (15.0) |
| 80-89                              | 409  | (23.1) | 78.0 (15.0) |
| 90-96                              | 235  | (13.3) | 81.9 (13.9) |
| Missing                            | 14   | (0.8)  | 58.1 (25.6) |
| <b>Social support sub-scores</b>   |      |        |             |
| <b>Attachment*</b>                 |      |        |             |
| 4-7                                | 51   | (3.5)  | 61.4 (23.4) |
| 8-11                               | 516  | (29.2) | 68.7 (18.0) |
| 12-16                              | 1193 | (67.5) | 77.5 (15.5) |
| Missing                            | 7    | (0.4)  | 61.0 (19.7) |
| <b>Social integration*</b>         |      |        |             |
| 4-7                                | 20   | (1.1)  | 56.2 (25.1) |
| 8-11                               | 429  | (24.3) | 67.1 (19.4) |
| 12-16                              | 1309 | (74.8) | 77.1 (15.2) |
| Missing                            | 9    | (0.5)  | 58.7 (21.5) |
| <b>Reassurance of worth*</b>       |      |        |             |
| 4-7                                | 37   | (2.1)  | 59.1 (19.5) |
| 8-11                               | 504  | (28.5) | 69.0 (19.1) |
| 12-16                              | 1215 | (68.8) | 77.2 (15.2) |
| Missing                            | 11   | (0.6)  | 62.0 (24.9) |
| <b>Reliable Alliance*</b>          |      |        |             |
| 4-7                                | 20   | (1.1)  | 49.6 (22.2) |
| 8-11                               | 251  | (14.2) | 66.9 (20.1) |
| 12-16                              | 1489 | (84.3) | 76.0 (15.9) |
| Missing                            | 7    | (0.4)  | 61.0 (19.7) |
| <b>Guidance sub-score*</b>         |      |        |             |
| 4-7                                | 36   | (2.0)  | 59.2 (22.2) |
| 8-11                               | 387  | (21.9) | 68.7 (18.9) |
| 12-16                              | 1337 | (75.7) | 76.6 (15.7) |
| Missing                            | 7    | (0.4)  | 54.6 (21.6) |
| <b>Opportunity for nurturance*</b> |      |        |             |
| 4-7                                | 29   | (1.6)  | 69.3 (18.9) |
| 8-11                               | 413  | (23.4) | 71.9 (18.8) |
| 12-16                              | 1316 | (74.5) | 75.4 (16.4) |
| Missing                            | 9    | (0.5)  | 58.7 (21.5) |

## Supplementary table, contd.

**Psychological flexibility score  
(AAQii score).**

|         |            |             |
|---------|------------|-------------|
| 10-19   | 5 (0.3)    | 23.2 (13.8) |
| 20-29   | 40 (2.3)   | 49.1 (22.1) |
| 30-39   | 147 (8.3)  | 63.0 (18.6) |
| 40-49   | 43 (24.7)  | 68.5 (16.8) |
| 50-59   | 664 (37.6) | 77.1 (13.9) |
| 60-70   | 457 (25.9) | 82.5 (13.5) |
| Missing | 1 (1.0)    | 69.6 (20.5) |

**Sleep Condition Indicator (SCI score)**

|         |            |             |
|---------|------------|-------------|
| 0 to <2 | 67 (3.8)   | 51.2 (22.3) |
| 2 to <4 | 264 (14.9) | 62.2 (19.5) |
| 4 to <6 | 646 (36.6) | 74.3 (14.6) |
| 6 to <8 | 384 (21.7) | 77.6 (14.2) |
| 8 to 10 | 386 (21.8) | 83.5 (12.2) |
| Missing | 20 (1.1)   | 77.3 (12.8) |

**AUDIT-C score**

|               |            |             |
|---------------|------------|-------------|
| Non-hazardous | 776 (43.9) | 74.0 (17.4) |
| Hazardous     | 915 (51.8) | 74.6 (16.9) |
| Missing       | 76 (4.3)   | 75.0 (17.0) |

**Brief Trauma Questionnaire  
(DSM-IV criteria)**

|             |             |             |
|-------------|-------------|-------------|
| Not exposed | 544 (30.8)  | 78.3 (15.1) |
| Exposed     | 1210 (68.5) | 72.5 (17.8) |
| Missing     | 13 (0.7)    | 80.6 (8.1)  |

1  
2  
3  
4  
5  
6  
7  
8  
9

## FACTORS ASSOCIATED WITH SELF-REPORTED HEALTH AMONG NEW ZEALAND MILITARY VETERANS: A CROSS-SECTIONAL STUDY

10  
11  
12  
13  
14  
15  
16  
17  
18  
19  
20  
21  
22  
23  
24  
25  
26  
27  
28  
29  
30  
31  
32  
33  
34  
35

David McBride,<sup>1</sup> Ari Samaranayaka<sup>2</sup>, Amy Richardson,<sup>1</sup> Dianne Gardner,<sup>3</sup> Daniel Shepherd,<sup>4</sup>  
Emma H. Wyeth<sup>5</sup>, Brandon deGraaf,<sup>6</sup> Sarah Derrett.<sup>1</sup>

<sup>1</sup>Department of Preventive and Social Medicine, Dunedin School of Medicine, University of Otago, New Zealand.

<sup>2</sup>Biostatistics Centre, Division of Health Sciences, University of Otago, Dunedin, New Zealand.

<sup>3</sup>School of Psychology, Massey University, New Zealand.

<sup>4</sup>Department of Psychology, Auckland University of Technology, New Zealand.

<sup>5</sup>Ngāi Tahu Māori Health Research Unit, Department of Preventive and Social Medicine, Dunedin School of Medicine, University of Otago, New Zealand.

<sup>6</sup>Injury Prevention Research Unit, Department of Preventive and Social Medicine, Dunedin School of Medicine, University of Otago, New Zealand.

### Keywords:

Military Medicine

Quality of Life

Risk Factors

Protective Factors

Point Prevalence

### Word count

2959

### Corresponding Author:

40  
41  
42  
43  
44  
45  
46  
47  
48  
49  
50  
51  
52  
53  
54  
55  
56  
57  
58  
59  
60

David McBride, Department of Preventive and Social Medicine, Adams Building, 18 Frederick Street, Dunedin 9017, New Zealand.

Email: [david.mcbride@otago.ac.nz](mailto:david.mcbride@otago.ac.nz)

Phone: +64 3 479 7208

Fax: +64 3 479 7298

## 1 ABSTRACT

### 2 Objective

3 To identify factors associated with better or poorer self-reported health status in New Zealand  
4 military Veterans.

### 5 Design

6 An online cross-sectional survey.

### 7 Participants

8 The participants of interest were the 3,874 currently serving Veterans who had been deployed  
9 to a conflict zone, but all Veterans were eligible to participate.

### 10 Study variables

11 Health status was self-reported using the EQ-5D-5L, which asks about problems across five  
12 dimensions (mobility, self-care, usual activities, pain or discomfort, and anxiety or  
13 depression), with five levels of severity (e.g. no, slight, moderate, severe or extreme  
14 problems), also containing a visual analogue scale (EQ-VAS), scaled from 0 (worst) to 100  
15 (best) imagined health. Hypothetical relationships with better health were positive social  
16 support, sleep and psychological flexibility; with poorer health, exposure to psychological  
17 trauma, distress and hazardous drinking.

### 18 Results:

19 The EQ5-D was completed by 1767 Veterans, 1009 serving, a response rate of 26% from that  
20 group, with 1767 completing the EQ5-D and entering the analysis, comprising 1458 who had  
21 deployed, 288 who had not, and the 21 who did not provide deployment data.

22 A significantly higher proportion of Veterans reported 'any problems' rather than 'no  
23 problems' with four EQ-5D dimensions: mobility, self-care, usual activities and pain or  
24 discomfort, but no difference in anxiety or depression. Age, length of service, deployment,  
25 psychological flexibility and better sleep quality were associated with higher EQ-VAS scores;  
26 distress with lower EQ-VAS scores.

### 27 Conclusion:

28 In this sample of New Zealand Veterans, psychological flexibility and good sleep are associated  
29 with better self-rated health, and distress and poor sleep with diminished health. These  
30 factors might be used as sentinel health indicators in assessing Veteran health status. As  
31 distress, psychological flexibility and sleep are closely related, cognitive behavioural therapy  
32 encompassing these domains may be useful in improving the health of New Zealand Veterans.

### 33 Keywords:

34 Self-rated health, wellbeing, EQ-5D, Veterans, deployment, military, risk factors.

## 35 **Strengths and limitations of this study**

- 36 • Many studies of Veterans have focused on adverse outcomes, but we have been able  
37 to focus on a holistic measure of 'health'.
- 38 • The study was sufficiently powered to detect important relationships indicating  
39 opportunities for intervention.
- 40 • The exact response rate is unknown, and bias may be a limitation.
- 41 • The cross-sectional design means that we cannot explore cause and effect  
42 relationships.

## 43 **INTRODUCTION**

44 The three major events in the military life course are entry to military service, deployment on  
45 active service and transition back to civilian life. On entry, soldiers, sailors and air personnel  
46 are subject to a selection process to ensure, as far as possible, good physical and mental  
47 health, giving rise to the 'healthy soldier effect,' with service personnel being, on average,  
48 healthier than the general population.[1] However, the physical and psychological stressors  
49 of military service have been found to erode this effect.[2]

50 The physical stressors have a particular impact on the lower limb, with load carriage, high  
51 intensity training and the design of footwear being implicated in injury causation.[3] A military  
52 career also increases opportunities for psychological trauma, and post-traumatic stress  
53 disorder (PTSD) has been identified as the 'signature injury' of United States service men and  
54 women deployed to Afghanistan and Iraq.[4]

55 A focus on adverse health events in the literature[5] means that wellbeing is relatively  
56 overlooked. In the long run, military service has been found to have positive effects.[6,7]  
57 Good health after service does, however, depend on the success of the 'military civilian  
58 transition', a complex process for which models have been developed.[8] Health problems  
59 developed in service, difficulty in assuming a post-service identity and many other factors  
60 contribute to health and wellbeing outcomes.[8] **In New Zealand, military Veterans can only  
61 access assistance from New Zealand Veteran's Affairs (NZVA) if they have undertaken  
62 'qualifying operational service' as defined by the Veteran Support Act 2014,[9] thus being  
63 Veterans in a legal sense. NZVA support some 12,000 Veterans, with an average age of 80  
64 years, 5000 being actively case managed.[10] The majority will have seen operational service  
65 in Korea, Borneo, Malaya and Vietnam. Post-Vietnam, smaller numbers deployed on United  
66 Nations and other missions, but the tempo of operations rose with the deployment to  
67 Bosnia in 1992, and some 9,000-10,000 'legal' Veterans deployed between then and the**

1  
2 68 withdrawal of New Zealand troops from Afghanistan in 2021. The Ministerial Veteran's  
3  
4 69 Health Advisory Panel, established under the Veteran Support Act, are specifically charged  
5  
6 70 with funding research on this 'contemporary Veteran' group, NZVA acknowledging that they  
7  
8 71 "have had different experiences, and have different needs, compared to the older veterans.  
9  
10 72 They are likely to have served in a number of deployments during their career, and come to  
11  
12 73 us with more complex health issues." [10]

13 74 The aims of this study were therefore to describe self-reported health among these Veterans,  
14  
15 75 and identify factors associated with better or poorer health.

## 16 76 **Veteran and public involvement**

17 77 The Ministerial Veterans Health Advisory Panel, [10] commissioned the study and advised on  
18  
19 78 the design. We also formed a steering group with representatives from the New Zealand  
20  
21 79 Defence Force, New Zealand Veterans Affairs, the Royal New Zealand Returned and Services  
22  
23 80 Association (RSA) [11] and No Duff, [12] a charity providing first response support to Veterans  
24  
25 81 and their families. We also consulted with the Ngāi Tahu Research Consultation Committee in  
26  
27 82 order to assess the importance of the project to Māori, New Zealand's indigenous population.  
28  
29 83 We undertook to inform the Veteran community before releasing the results, also to give all  
30  
31 84 Veterans, defined as anyone who had served in the military, an opportunity to participate.

## 32 85 **METHODS**

### 33 86 **Participants**

34  
35 87 Data were collected via an online survey, a postal version being available on request. There is  
36  
37 88 no comprehensive Veteran registry, however in July 2018, a link to the online questionnaire  
38  
39 89 was sent by email to all currently serving regular and reserve New Zealand Defence Force  
40  
41 90 (NZDF) members registered on the NZDF email system who were 'legal Veterans', as indicated  
42  
43 91 by holding the New Zealand Operational Service Medal, numbering 3,874 personnel at that  
44  
45 92 time. An introductory message and link to the questionnaire were also presented on the NZDF  
46  
47 93 'intranet landing page', a secure internal webpage from which all regular force personnel can  
48  
49 94 access relevant work-related content, tools, and resources. Retired military personnel were  
50  
51 95 invited to participate through posters distributed to reserve units and the 43 local social clubs  
52  
53 96 identified by the RSA national office to be 'Veteran active.' Paper questionnaires with return  
54  
55 97 postage envelopes were made available at these sites. Announcements were also made on  
56  
57 98 military social media pages, and both retired and currently serving personnel were invited to  
58  
59 99 participate through an announcement on the No Duff website. The questionnaire was  
60

1  
2 100 available for completion from June to December 2018. Ethics approval for the study was  
3  
4 101 obtained from the Northern B Health and Disability Ethics Committee, reference 17NTB118.

5  
6 102 **Questionnaire**

7  
8 103 *Criterion variable*

9  
10 104 Self-rated health status was assessed using the EQ-5D-5L,[13] a short questionnaire asking  
11  
12 105 about the respondent's health across five dimensions: mobility, self-care, usual activities, pain  
13  
14 106 or discomfort and anxiety or depression, with response options ranging from (e.g.) 'no  
15  
16 107 problems', to 'extreme problems'. For each dimension, participants were categorised as  
17  
18 108 having 'any problems' if they selected any response other than 'no problems'.

19 109 Additionally, the EQ-5D-5L visual analogue scale (EQ-VAS) asks the respondent to mark on a  
20  
21 110 vertical visual analogue scale (VAS) how good or bad their health is today, where the  
22  
23 111 endpoints are labelled 'the best health you can imagine' (score of 100) and 'the worst health  
24  
25 112 you can imagine' (score of 0).

26 113 *Independent variables*

27  
28 114 Demographic characteristics included age, sex, ethnicity, service years, and past deployment  
29  
30 115 on operational service (yes/no). Ethnicity prioritisation was adopted,[14] whereby  
31  
32 116 participants with multiple responses were assigned to one of the categories, in the order of  
33  
34 117 Māori, Pacific Peoples, Other and European.

35 118 General psychiatric morbidity was assessed using the 12-item General Health Questionnaire  
36  
37 119 (GHQ-12),[15] scored using a four point scale (0-3) and summing the 12 items to give a total  
38  
39 120 score, with higher scores indicating elevated distress.

40  
41 121 Social support was measured using the Social Provisions Scale,[16] with responses made on a  
42  
43 122 four-point Likert-type scale ranging from 1 'strongly disagree' to 4 'strongly agree'. The 24  
44  
45 123 items can be reduced to six subscales (attachment, social integration, reassurance of worth,  
46  
47 124 reliable alliance, social guidance, opportunity for nurturance) or summed to create a total  
48  
49 125 score, with greater scores indicating greater social support.

50 126 Alcohol use was measured using the AUDIT-C,[17] scaled from 0-12. A score of 3+ for women  
51  
52 127 and 4+ for men indicated potentially hazardous drinking behaviour.

53 128 Sleep quality was assessed with the Sleep Condition Indicator (SCI), [18] assessing insomnia as  
54  
55 129 described in the Diagnostic and Statistical Manual of Mental Disorders version 5 (DSM-V).[19]

56  
57 130 The SCI consists of eight items rated from 0-4, the total scores being scaled to a range of 0 to  
58  
59 131 10, where higher scores represent better sleep.



1  
2 132 Trauma exposure was assessed with the Brief Trauma Scale (BTS),[20] which captures past  
3  
4 133 exposure to situations that were life threatening or capable of producing serious injury.  
5  
6 134 Psychological flexibility was measured with the 10-item AAQ-II, designed as a measure of  
7  
8 135 effectiveness in a particular mode of behavioural intervention, Acceptance and Commitment  
9  
10 136 Therapy (ACT).[21] Items were answered on a 7-point scale, with options ranging from 'never  
11  
12 137 true' to 'always true'. The items were summed to obtain a total score (possible range 10 to  
13  
14 138 70), with higher scores indicative of greater psychological flexibility.

### 139 **Statistical analyses**

140 With respect to the calculation of summed scores, if only one item was missing for a particular  
141  
142 measure then this was imputed with the mean of the remaining items; if more than one item  
143  
144 was missing then the score was set to missing for that participant. Complete case analysis was  
145  
146 used in the remaining analyses. The five dimensions of the EQ-5D-5L were compared to the  
147  
148 NZ population normative values.[22]

149 **Z tests were used to compare the EQ5D dimension scores with those of the New Zealand**  
150  
151 **general population.**[22] Univariate ordinary least-squares linear regression analyses assessed  
152  
153 the strength of relationships between each independent variable and EQ-VAS scores, using  
154  
155 robust standard errors to account for heteroscedasticity and calculating 95% confidence  
156  
157 intervals (95% CIs). Multivariable linear regression was then used to identify the role of the  
158  
159 independent variables while adjusting for each other. None of the social support sub-scales  
160  
161 were used in this multivariable model, instead using the social support total score. The model  
162  
163 was built using backward variable selection with  $p < 0.10$  for variable retention, with the  
164  
165 exceptions of age, sex, service years, and deployment status which were retained as adjusting  
166  
167 variables irrespective of p-values.

## 168 **RESULTS**

169 The EQ-5D was completed by 1767 Veterans, 1009 who were serving (26% of that group), 458  
170  
171 who had retired, 288 who had not deployed, and 21 who did not provide deployment data.  
172  
173 There are no reliable denominator data on retired and non-deployed Veterans in New  
174  
175 Zealand.

176 A supplementary table presents the EQ-VAS score according to the sample characteristics.  
177  
178 Figure 1 shows the proportion of EQ-5D-5L dimension responses reporting 'any problem'  
179  
180 severity level other than 'no problems' in comparison to the New Zealand population  
181  
182 normative values,[22] with table 1 showing the 95% CI's and Z values.

183 **Figure 1 about here**

165 Table 1, Proportion of 'any problem' in EQ-5D domains

| Domain             | Veterans            | NZ population       | Z value (p)  |
|--------------------|---------------------|---------------------|--------------|
|                    | Proportion (95% CI) | Proportion (95% CI) |              |
| Mobility           | 0.40 (0.38-0.42)    | 0.28 (0.26-0.30)    | 8.5 (<.0001) |
| Self-care          | 0.11 (0.10-0.12)    | 0.09 (0.07-0.10)    | 2.8 (0.03)   |
| Usual activities   | 0.38 (0.36-0.40)    | 0.30 (0.28-0.31)    | 5.6 (<.001)  |
| Pain/discomfort    | 0.75 (0.73-0.76)    | 0.62 (0.60-0.63)    | 9.0 (<.0001) |
| Anxiety/depression | 0.46 (0.44-0.48)    | 0.46 (0.44-0.48)    | 0 (1)        |

166

167 The results of the univariate analysis are displayed in Table 2. Here, for continuous  
 168 characteristics, the regression coefficient ( $\beta$ ) represents the change in the mean EQ-VAS  
 169 associated with one unit increase in the characteristic. For categorical characteristics,  $\beta$  is the  
 170 change in mean EQ-VAS scores compared to the referent category.

171

172 **Table 2: Univariate cross-sectional associations between variables and mean EQ-VAS scores**  
 173 **for New Zealand Veterans (N=1,762)**

| Characteristic                      | n    | $\beta$   | 95% CIs        | p-value |
|-------------------------------------|------|-----------|----------------|---------|
| <b>Age*</b>                         | 1762 | -0.19     | [-0.24, -0.13] | <.01    |
| <b>Sex</b>                          |      |           |                |         |
| Female                              | 220  | Reference | -              |         |
| Male                                | 1520 | -0.65     | [-3.04, 1.73]  | .59     |
| <b>Ethnicity</b>                    |      |           |                |         |
| NZ European                         | 1382 | Reference | -              |         |
| Māori                               | 245  | 1.21      | [-1.00, 3.42]  |         |
| Other                               | 140  | -2.95     | [-6.26, 0.36]  | 0.10    |
| <b>Service years*</b>               | 1670 | 0.19      | [0.11, 0.27]   | <.01    |
| <b>Deployment status</b>            |      |           |                |         |
| Not deployed                        | 288  | Reference | -              |         |
| Deployed                            | 1458 | 5.80      | [ 3.35, 8.25 ] | <.01    |
| <b>GHQ-12 score*</b>                | 1765 | -1.63     | [-1.79, -1.47] | <.01    |
| <b>Social support*</b>              |      |           |                |         |
| Attachment                          | 1760 | 2.02      | [ 1.69, 2.34 ] | <.01    |
| Social integration                  | 1758 | 2.45      | [ 2.06, 2.88 ] | <.01    |
| Reassurance of worth                | 1756 | 2.48      | [ 2.11, 2.85 ] | <.01    |
| Reliable alliance                   | 1760 | 2.30      | [ 1.91, 2.70 ] | <.01    |
| Social guidance                     | 1760 | 2.00      | [ 1.65, 2.35 ] | <.01    |
| Opportunity for nurturance          | 1758 | 0.85      | [ 0.47, 1.23 ] | <.01    |
| Social support total score          | 1753 | 0.52      | [ 0.44, 0.59 ] | <.01    |
| <b>Psychological flexibility*</b>   | 1750 | 0.79      | [ 0.71, 0.87 ] | <.01    |
| <b>Sleep score*</b>                 | 1747 | 3.47      | [ 3.11, 3.83 ] | <.01    |
| <b>AUDIT-C</b>                      |      |           |                |         |
| Non-hazardous                       |      | Reference | -              |         |
| Hazardous                           |      | 0.62      | [-1.03, 2.26]  | 0.46    |
| <b>Exposure to traumatic events</b> |      |           |                |         |
| Not exposed                         | 1754 | Reference | -              |         |
| Exposed                             |      | -5.72     | [-7.34, -4.11] | <.01    |

174 \*Scored as continuous variables, coefficient is per unit increase.

175 Of the demographic variables, age was associated with lower EQ-VAS scores, length of  
 176 service with higher scores. No relationships were apparent for sex or ethnicity. Positive  
 177 coefficients, indicating better health with presence of the characteristic, were present for  
 178 dichotomous variables of deployment, where the mean EQ-VAS score for deployed Veterans  
 179 was 5.8 VAS units higher (better) than for non-deployed. The largest negative associations  
 180 were for exposure to traumatic events, with a mean EQ-VAS score 5.7 lower for those  
 181 exposed compared to those not exposed. Distress, as measured by the GHQ-12, had a  
 182 negative association with health state. Positive associations with health state were found for

1  
2 183 psychological flexibility as measured by the AAQ-II, better sleep scores, the total support  
3  
4 184 scores and the individual dimensions.  
5  
6 185 Table 3 shows the results from two models. The first model is adjusted for the other  
7  
8 186 characteristics, with 11 variables and 1,557 people providing valid responses for all factors  
9  
10 187 included in the model. All effect sizes were reduced, and the social support and AUDIT-C  
11  
12 188 scores were no longer associated, with 11 variables explaining 35% of the variability in the  
13  
14 189 EQ-VAS.  
15  
16 190 The final model involved backward variable selection setting a p-value of 0.10, identifying a  
17  
18 191 smaller subset of variables. Age, sex, service years, and deployment status were retained in  
19  
20 192 the model irrespective of their p-values, thus adjusting for those variables, using 1,600  
21  
22 193 complete responses. Social support and AUDIT-C hazardous drinking were not retained in  
23  
24 194 this final model; other coefficients remaining essentially the same, with a minimal effect on  
25  
26  
27  
28  
29  
30  
31  
32  
33  
34  
35  
36  
37  
38  
39  
40  
41  
42  
43  
44  
45  
46  
47  
48  
49  
50  
51  
52  
53  
54  
55  
56  
57  
58  
59  
60

196 **Table 3. Multivariable models of associations between variables and mean EQ-VAS scores**  
 197 **for New Zealand Veterans**

| Characteristic                                  | Adjusted model, N used =1,557 |                |              | Final model, N used =1,600 |                |              |
|-------------------------------------------------|-------------------------------|----------------|--------------|----------------------------|----------------|--------------|
|                                                 | $\beta$                       | 95% CI         | p-value      | $\beta$                    | 95% CI         | p-value      |
| <b>Age (years)*</b>                             | 0.17                          | [-0.23, 1.11]  | <0.01        | -0.17                      | [-0.23, -0.12] | <0.01        |
| <b>Sex</b>                                      |                               |                |              |                            |                |              |
| Female                                          | <b>Ref</b>                    | -              | -            | <b>Ref</b>                 | -              | -            |
| Male                                            | 0.24                          | [-2.52, 2.03]  | 0.84         | -0.60                      | [-2.82, 1.63]  | 0.60         |
| <b>Ethnicity</b>                                |                               |                |              |                            |                |              |
| NZ European                                     | <b>Ref</b>                    | -              | -            | <b>Ref</b>                 | -              | -            |
| Māori                                           | 0.29                          | [-1.70, 2.27]  | 0.07         | 0.19                       | [-1.77, 2.14]  | -            |
| Other                                           | -3.58                         | [-6.66, -0.51] |              | -2.91                      | [-5.88, 0.06]  | 0.15         |
| <b>Service years*</b>                           | 0.17                          | [ 0.10, 0.25]  | <0.01        | 0.17                       | [ 0.10, 0.25]  | <0.01        |
| <b>Deployment status</b>                        |                               |                |              |                            |                |              |
| Not deployed                                    | <b>Ref</b>                    | -              | -            | <b>Ref</b>                 | -              | -            |
| Deployed                                        | 2.91                          | [ 0.64, 5.18]  | <0.05        | 2.90                       | [0.65, 5.15]   | 0.01         |
| <b>GHQ12 score*</b>                             | -0.87                         | [-1.09, -0.65] | <0.01        | -0.92                      | [-1.13, -0.71] | <0.01        |
| <b>Social support (SPS score)*</b>              | 0.01                          | [-0.07, 0.10]  | 0.76         | -                          | -              | -            |
| <b>Psychological flexibility score (AAQii)*</b> | 0.26                          | [ 0.15, 0.37]  | <0.01        | 0.24                       | [0.14, 0.35]   | <0.01        |
| <b>Sleep score (SCI), Range 0-10*</b>           | 1.60                          | [ 1.18, 2.02]  | <0.01        | 1.63                       | [1.22, 2.05]   | <0.01        |
| <b>AUDIT_C score</b>                            |                               |                |              |                            |                |              |
| Non hazardous                                   | <b>Ref</b>                    | -              | -            | -                          | -              | -            |
| Hazardous                                       | 0.41                          | [-1.00, 1.81]  | 0.57         | -                          | -              | -            |
| <b>Exposure to traumatic events (BTQ)</b>       |                               |                |              |                            |                |              |
| Not exposed                                     | <b>Ref</b>                    | -              | -            | <b>Ref</b>                 | -              | -            |
| Exposed                                         | -1.77                         | [-3.30, -0.24] | <0.05        | -1.81                      | [-3.32, 0.30]  | 0.02         |
|                                                 |                               |                | $R^2 = 0.35$ |                            |                | $R^2 = 0.36$ |

198 \*Scored as continuous variables, coefficient is per unit increase.

## 199 DISCUSSION

### 200 *Principal findings*

201 **With the exception of anxiety or depression, Veterans had a significantly greater proportion**  
 202 **of 'any problem' responses in the EQ-5D dimensions than the general population of New**  
 203 **Zealand.**

204 The final model identified variables independently associated with the EQ-VAS score: age,  
 205 length of service, deployment, the GHQ score, psychological flexibility, the sleep score and  
 206 exposure to traumatic events. The results make conceptual sense in that distress is associated  
 207 with reduced EQ-VAS and psychological flexibility with a modest protective effect, however,  
 208 and unusually, Social Support was dropped, however the SPS was found to have a significant  
 209 correlation with distress, and collinearity was the problem. There are also known to be many

1  
2 210 other influences on health, including 'social wellbeing',[5] financial status, personality and  
3  
4 211 non-deployment related stressors,[23] which we have not measured.

5  
6 212 *Strengths and weaknesses*

7 213 Strengths of our study were the relatively large sample size, the inclusion of all Veterans, the  
8  
9 214 assessment of 'health', infrequently investigated in Veteran populations, and the inclusion of  
10  
11 215 New Zealand Veterans with a range of characteristics, including 'deployed' and 'non-  
12  
13 216 deployed' Veterans. As a measure of health, the EQ-5D-5L dimensions and EQ-VAS ask about  
14  
15 217 health on the day that respondents complete the questionnaire, the EQ-VAS end points being,  
16  
17 218 respectively, the 'best' and 'worst' health they can imagine, so it is a holistic measure of health  
18  
19 219 state.[24]

20  
21 220 The response rate of 26% from serving Veterans, along with the unknown total number of  
22  
23 221 Veterans, raises the question of bias, the direction of which is difficult to assess, as

24  
25 222 responses may be more likely from either Veterans with good or poor health. **The healthy  
26  
27 223 soldier effect is well known, service having a positive effect on wellbeing, with serving NZ**

28  
29 224 **Veterans having good access to primary health care through the military system, but the**  
30  
31 225 **public health care system is the primary pathway to care for all Veterans, who are also**

32  
33 226 **covered by the 'no fault' accident compensation scheme for accidental injuries and**  
34  
35 227 **occupational diseases.[25] Deployed Veterans may be at an advantage, but are covered by**

36  
37 228 **NZVA only if their illness or injury is linked to a particular deployment, and the condition is**  
38  
39 229 **listed on the 'Statements of Principle' of the Australian Repatriation Medical Authority.[26]**

40  
41 230 We also know that New Veterans tend to be stoic, so they might underestimate their health  
42  
43 231 concerns,[27] and there are likely to be other personal characteristics that we have not

44  
45 232 measured. We were however able to adjust for deployment status, which did have a positive  
46  
47 233 association with health state. **In the interest of minimising responder burden, we used brief**

48  
49 234 **scales, which might reduce construct validity. Distress, sleep, psychological flexibility and**  
50  
51 235 **exposure to traumatic events are likely to be related, so collinearity was difficult to avoid.**

52  
53 236 **The confounding effect was greatest for social support, but our finding does not mean that**  
54  
55 237 **social support is of no importance to Veterans.** The precision of the other coefficients may

56  
57 238 also have been affected. Finally, the cross-sectional design means that we cannot explore  
58  
59 239 cause and effect, so recommendations for future interventions require additional support

60  
240 from longitudinal studies.

241 *Comparison with other studies*

1  
2 242 We have previously reported factors associated with post-traumatic stress in this group,[28]  
3  
4 243 using the Military Post Traumatic Stress Checklist (PCL-M). Factors associated with higher PCL-  
5  
6 244 M scores were trauma exposure, older age, male gender, and being of Māori ethnicity. Factors  
7  
8 245 associated with lower PCL-M scores were greater length of service, psychological flexibility,  
9  
10 246 and better quality sleep. Using health as the outcome disclosed that Māori did not have poorer  
11  
12 247 self-reported health compared to non-Māori, that deployment had a positive effect, and in  
13  
14 248 the univariate models, all of the dimensions of social support were associated with improved  
15  
16 249 health. The final model also included good sleep and psychological flexibility, providing most  
17  
18 250 of the explanatory power in the model.  
19  
20 251 No other studies appear to have used the EQ-VAS as an outcome measure for Veteran health.  
21  
22 252 Boehmer et al.[29] examined wellbeing among participants in the 2000 Behavioural Risk  
23  
24 253 Factor Surveillance System describing health-related quality of life (HRQoL) by sex and military  
25  
26 254 status, active duty, reservists Veterans, or no military service. Participants were asked to rate  
27  
28 255 recent physical health, mental health, and activity limitation. Active duty men were more likely  
29  
30 256 than men without military service to report 14 or more days of activity limitation, pain, and  
31  
32 257 not enough rest in the past 30 days, the mobility and pain findings being similar to our sample.  
33  
34 258 Notably, the predominant reason for medical discharge from the British Armed Forces was  
35  
36 259 musculoskeletal problems.[30]  
37  
38 260 Contrary to our finding on deployment, there are reports indicating that non-deployed  
39  
40 261 personnel retain better health than those who have been deployed,[31] Diaz Santana et al.  
41  
42 262 having carried out a cross-sectional survey of 60,000 U.S. Veterans of Afghanistan and Iraq,  
43  
44 263 with 20,563 responses. In contrast to our finding, mental quality of life scores were higher  
45  
46 264 among the non-deployed group compared to the deployed group, though the deployed group  
47  
48 265 reported higher physical quality of life scores compared to the non-deployed. Again in  
49  
50 266 contrast, both mental and physical quality of life were lower among Veterans compared to  
51  
52 267 U.S. population norms.  
53  
54 268 Both positive and negative consequences of deployment have been described.[7,32] In a study  
55  
56 269 of Dutch Veterans,[7] two out of three reported a positive effect of deployment on their  
57  
58 270 quality of life at the time of the survey, this being related to positive feelings such as  
59  
60 271 satisfaction or comradeship, but a few having emotions such as frustration or shame. As  
272 regards tangible effects,[32] negative consequences included the military 'chain of command',  
273 being away from home, and deterioration of marital/significant other relationships. Positive  
274 influences include improved financial security, self-improvement, and time to reflect.

1  
2 275 We found sleep to be associated with better health, but sleep difficulties are a common  
3  
4 276 symptom for those with PTSD. McCarthy et al.[33] reported on the 3,157 U.S. military  
5  
6 277 Veterans enrolled in the National Health and Resilience in Veterans Study, in which 27.6%  
7  
8 278 reported poor sleep quality. Path analyses revealed significant associations between poor  
9  
10 279 sleep, severity of PTSD, poorer mental and physical health functioning and lower overall  
11  
12 280 quality of life.

### 13 281 *Future directions*

14  
15 282 The results suggest that distress, psychological flexibility, and sleep have an important  
16  
17 283 relationship with self-rated health among Veterans in this study.

18  
19 284 Reducing distress through the promotion of psychological flexibility might be possible,  
20  
21 285 although our finding here must be subject to caution as several researchers argue that the  
22  
23 286 AAQ-II may be measuring psychological distress and affect rather than psychological  
24  
25 287 inflexibility.[34] Psychological flexibility is specifically targeted by ACT, a psychological  
26  
27 288 intervention described as being in the 'third wave' of behaviour change strategies.[35] The six  
28  
29 289 core processes of ACT (acceptance, cognitive defusion, being present, self as context, values,  
30  
31 290 and committed action) aim to increase psychological flexibility, the goal being "to have clients  
32  
33 291 experience the world more directly so that their behavior is more flexible and thus their  
34  
35 292 actions more consistent with the values that they hold." [35] Approaches such as ACT may  
36  
37 293 therefore improve health state and has been shown to improve pain acceptance and  
38  
39 294 psychological flexibility [36]. Lang et al. carried out a randomised clinical trial (RCT), comparing  
40  
41 295 ACT with person-centred therapy,[37] showing a general improvement in symptoms of  
42  
43 296 distress across both treatment arms, ACT providing superior improvement in insomnia. The  
44  
45 297 drop-out rate for both therapies was however high, and the two groups did not exhibit any  
46  
47 298 change in psychological flexibility. The authors proposed that future studies should include  
48  
49 299 additional measures of ACT processes to determine which are actually affected by ACT.

50  
51 300 Sleep in military personnel has been recognised as a 'vital health behaviour' for which policies  
52  
53 301 and guidelines must be developed.[38] Cognitive behavioural therapy for insomnia (CBT-I) is  
54  
55 302 regarded as an effective 'first line' treatment, and a brief intervention has been described for  
56  
57 303 use in Australian general practice.[39] The Lang et al. trial[37] showed CBT-I to be effective,  
58  
59 304 however future studies should include outcome measures that include ACT processes. Our  
60  
305 final model showed that distress had a negative association with health, and psychological  
306 flexibility had a positive relationship, with sleep most likely related to both of these variables.  
307 It would seem important to screen for these conditions prior to transition from the military,



1  
2 308 as well as among retired Veterans, in order to provide targeted support. Further research is  
3  
4 309 needed to examine the potential of CBT to improve Veterans' wellbeing.

5  
6 310 Figure 1 Caption.

7 311 **The proportion of Veterans reporting 'any problem' with each of the EQ-5D-5L dimension**  
8  
9 312 **scores compared to the NZ population normative proportions**

## 10 11 313 REFERENCES

- 12 314 1. McLaughlin R, Nielsen L, Waller M. An Evaluation of the Effect of Military Service on  
13  
14 315 Mortality: Quantifying the Healthy Soldier Effect. *Ann Epidemiol.* 2008;18(2):928-936.
- 15 316 2. Bollinger MJ, Schmidt S, Pugh JA et al. Erosion of the healthy soldier effect in Veterans  
16  
17 317 of US military service in Iraq and Afghanistan. *Popul Health Metr.* 2015;13:8.
- 18 318 3. Kimberley A, Andersen KA, Grimshaw PN et al. Musculoskeletal Lower Limb Injury Risk  
19  
20 319 in Army Populations. *Sports Med-Open* 2016;2:22. DOI 10.1186/s40798-016-0046-z.
- 21 320 4. Hoge CW, Castro CA, Messer SC et al. Combat duty in Iraq and Afghanistan, mental  
22  
23 321 health problems, and barriers to care. *N Engl J Med.* 2004;351(1):13–22.
- 24 322 5. Oster C, Morello A, Venning A et al. The health and wellbeing needs of Veterans: a  
25  
26 323 rapid review. *BMC Psychiatry.* 2017;17(1):414.
- 27 324 6. Spiro A, 3rd, Settersten RA, Aldwin CM. Long-term Outcomes of Military Service in  
28  
29 325 Aging and the Life Course: A Positive Re-envisioning. *Gerontologist.* 2016;56(1):5-13.
- 30 326 7. Duel J and Reijnen A. The long term effects of military deployment and their relation  
31  
32 327 with the quality of life of Dutch Veterans. *Mil Behav Heal.* 2021;9(2):160-169.
- 33 328 8. Pedlar D, Thompson JM, Castro CA. Military Veteran reintegration. Military-to-civilian  
34  
35 329 transition theories and frameworks. In: Castro C, Dursun S, editors. *Military Veteran*  
36  
37 330 *reintegration, approach, management, and assessment of military Veterans*  
38  
39 331 *transitioning to civilian life.* San Diego: Academic Press; 2019. 257p.
- 40 332 9. Veterans Support Act (NZ) 2014. [cited 2020 28 August] Available:  
41  
42 333 <https://www.legislation.govt.nz/act/public/2014/0056/latest/whole.html>.
- 43 334 10. New Zealand Government. Briefing to the Incoming Minister for Veterans. Wellington:  
44  
45 335 New Zealand Veteran's Affairs; 2020. [cited 2020 28 August] Available from:  
46  
47 336 <https://www.beehive.govt.nz/sites/default/files/2020-12/Veteran%20Affairs.pdf>.
- 48 337 11. Royal New Zealand Returned and Services Association [internet]. [cited 2022 2  
49  
50 338 February] Available: <https://www.rsa.org.nz/>.
- 51 339 12. NoDuff. [Internet]. [cited 2022 2 February] <https://www.noduff.org/>.

13. EuroQol Research Foundation. EQ-5D-5L User Guide [Internet]. Rotterdam: EuroQol Research Foundation; 2021. [cited 2022 2 February]. Available from: <https://euroqol.org/eq-5d-instruments/eq-5d-5l-about/>.
14. Health Information Standards Organisation. Ethnicity data protocols. Wellington: Ministry of Health; 2017. Standard No.: HISO 10001:2017.
15. Goldberg D.P. The Detection of Psychiatric Illness by Questionnaire. Maudsley Monograph No. 21. London: Oxford University Press; 1972.
16. Barrera, M., Jr. and Ainlay, S.L. The structure of social support: a conceptual and empirical analysis. *J Comm Psychol*. 1983;11(2):133-43.
17. Bush K, Kivlahan DR, McDonell MB et al. The AUDIT alcohol consumption questions (AUDIT-C): an effective brief screening test for problem drinking. Ambulatory Care Quality Improvement Project (ACQUIP). Alcohol Use Disorders Identification Test. *Arch Intern Med*. 1998;158(16):1789-95.
18. Espie CA, Kyle SD, Hames P, Gardani M et al. The Sleep Condition Indicator: a clinical screening tool to evaluate insomnia disorder. *BMJ Open*. 2014;4(3): e004183.
19. American Psychiatric Association. Diagnostic and Statistical Manual of Mental Disorders (DSM-5). Fifth edition. Washington DC: American Psychiatric Association 2013. 991p.
20. Schnurr PP, Spiro A, Vielhauer MJ, et al. Trauma in the Lives of Older Men: Findings from the Normative Aging Study. *Journal of Clinical Geropsychology*. 2002;8(3):175-87.
21. Bond FW, Hayes SC, Baer RA et al. Preliminary psychometric properties of the Acceptance and Action Questionnaire-II: a revised measure of psychological inflexibility and experiential avoidance. *Behav Therapy*. 2011;42(4): 676-688.
22. Sullivan T, Hansen P, Ombler F, et al. (2020) A new tool for creating personal and social EQ-5D-5L value sets, including valuing 'dead'. *Soc Sci Med*. 2020; 246:112707.
23. Brooks SK, Greenberg N. Non-deployment factors affecting psychological wellbeing in military personnel: literature review. *J Ment Health*. 2018;27(1):80-90.
24. Feng Y, Parkin D, Devlin NJ. Assessing the performance of the EQ-VAS in the NHS PROMs programme. *Qual Life Res*. 2014;23(3):977-89.
25. Accident Compensation Corporation. Homepage [Internet] Wellington: Accident Compensation Corporation 2022 [cited 2022 Feb 16] Available from: <https://www.acc.co.nz/>.

- 1  
2 373 26. Repatriation Medical Authority. Statements of Principle [Internet]. Canberra ACT:  
3  
4 374 Repatriation Medical Authority 2022 [cited 2022 Feb 16] Available from:  
5  
6 375 <http://www.rma.gov.au/sops/>.  
7  
8 376 27. Austin G, Calvert Toby, Fasi N, et al. Soldiering on only goes so far: How a qualitative  
9  
10 377 study on Veteran loneliness in New Zealand influenced that support during COVID-19  
11  
12 378 lockdown. *Journal of Military, Veteran and Family Health*. 2020;6(S2):60-69.  
13  
14 379 28. Richardson A, Gurung G, Samaranayaka A, et al. Risk and protective factors for post-  
15  
16 380 traumatic stress among New Zealand military personnel: A cross sectional study. *PLoS*  
17  
18 381 *One*. 2020;15(4):e0231460.  
19  
20 382 29. Boehmer TK, Boothe VL, Flanders WD et al. Health-related quality of life of U.S. military  
21  
22 383 personnel: a population-based study. *Mil Med*. 2003;168(11):941-7.  
23  
24 384 30. Williamson V, Diehle J, Dunn R, et al. The impact of military service on health and well-  
25  
26 385 being. *Occup Med (Lond)*. 2019;69(1):64-70.  
27  
28 386 31. Diaz Santana MV, Eber S, Barth S, Cypel Y et al. Health-Related Quality of Life Among  
29  
30 387 U.S. Veterans of Operation Enduring Freedom and Operation Iraqi Freedom-Results  
31  
32 388 From a Population-Based Study. *Mil Med*. 2017;182(11):e1885-e91.  
33  
34 389 32. Newby JH, McCarroll JE, Ursano RJ, et al. Positive and negative consequences of a  
35  
36 390 military deployment. *Mil Med*. 2005;170(10):815-9.  
37  
38 391 33. McCarthy E, DeViva JC, Norman SB, et al. Self-assessed sleep quality partially mediates  
39  
40 392 the relationship between PTSD symptoms and functioning and quality of life in U.S.  
41  
42 393 Veterans: Results from the National Health and Resilience in Veterans Study. *Psychol*  
43  
44 394 *Trauma*. 2019;11(8):869-76.  
45  
46 395 34. Wolgast M. What does the Acceptance and Action Questionnaire (AAQ-II) really  
47  
48 396 measure? *Behav Ther*. 2014;45(6):831-839.  
49  
50 397 35. Hayes SC, Luoma JB, Bond FW, Masuda A, Lillis J. Acceptance and commitment  
51  
52 398 therapy: model, processes and outcomes. *Behav Res Ther*. 2006;44(1):1-25.  
53  
54 399 36. Hughes LS, Clark J, Colclough JA, Dale E, McMillan D. Acceptance and Commitment  
55  
56 400 Therapy (ACT) for Chronic Pain: A Systematic Review and Meta-Analyses. *Clin J Pain*.  
57  
58 401 2017 Jun;33(6):552-568. doi: 10.1097/AJP.0000000000000425. PMID: 27479642.  
59  
60 402 37. Lang AJ, Schnurr PP, Jain S, He F, Walser RD, Bolton E, et al. Randomized controlled  
403  
404 404 trial of acceptance and commitment therapy for distress and impairment in  
OEF/OIF/OND Veterans. *Psychol Trauma*. 2017;9(Suppl 1):74-84.

- 1  
2 405 38. Troxel WM et al. Sleep in the Military: Promoting Healthy Sleep Among U.S.  
3  
4 406 Servicemembers. RAND Corporation, 2015[cited 2021 August 28]. Available from:  
5  
6 407 [https://www.rand.org/content/dam/rand/pubs/research\\_reports/RR700/RR739/RA](https://www.rand.org/content/dam/rand/pubs/research_reports/RR700/RR739/RAND_RR739.pdf)  
7  
8 408 [ND\\_RR739.pdf](https://www.rand.org/content/dam/rand/pubs/research_reports/RR700/RR739/RAND_RR739.pdf).  
9  
10 409 39. Sweetman A et al. A step-by-step model for a brief behavioural treatment for  
11 410 insomnia in Australian general practice. Aust J Gen Pract. 2021;50(5):287–293.  
12  
13 411  
14  
15  
16  
17  
18  
19  
20  
21  
22  
23  
24  
25  
26  
27  
28  
29  
30  
31  
32  
33  
34  
35  
36  
37  
38  
39  
40  
41  
42  
43  
44  
45  
46  
47  
48  
49  
50  
51  
52  
53  
54  
55  
56  
57  
58  
59  
60

## 412 DATA SHARING STATEMENT

413 Data from this study is unsuitable for public deposition due to the privacy of participant data.  
414 Data are anonymised, but contain information on deployments (including location and  
415 duration), which could lead to some participants being identified. Furthermore, the  
416 participant information sheet, as required by the Southern Health and Disability Ethics  
417 Committee specifically contains the statement that 'all study data would be kept strictly  
418 confidential to the research team.' Qualified researchers may apply for data access with the  
419 research team at veterans.health@otago.ac.nz and/or hdecs@moh.govt.nz.

## 420 FUNDING

421 This work was supported by a research grant from the Ministerial Veterans Health Advisory  
422 Panel, funded through the War Pensions Medical Research Trust Fund, also by Lottery Health  
423 and the Royal New Zealand Returned and Services Association.

## 424 COMPETING INTERESTS

425 None declared.

## 426 CONTRIBUTION

427 **Investigation:** Amy Richardson, Emma H. Wyeth, Sarah Derrett, Daniel Shepherd, David  
428 McBride.

429 **Methodology:** Amy Richardson, Ari Samaranayaka, Dianne Gardner, Emma H. Wyeth, Sarah  
430 Derrett, David McBride. Daniel Shepherd

431 **Project administration:** Amy Richardson

432 **Resources:** Brandon de Graaf

433 **Software:** Brandon de Graaf

434 **Supervision:** Ari Samaranayaka

435 **Validation:** Amy Richardson

436 **Visualization:** Amy Richardson

437 **Writing – original draft:** David McBride. AS, DG, EHW, SD and DS contributed to the re-writes  
438 and final draft

## 439 ACKNOWLEDGEMENTS

440 We would like to thank Shane Harvey for his input into the initial design, Aidan Smith, previous  
441 research advisor to the NZDF, for steering us through the consents process, also the members  
442 of our steering group: COL Clare Bennett (NZDF); Ms Marti Eller (New Zealand Veterans

1  
2  
3  
4  
5  
6  
7  
8  
9  
10  
11  
12  
13  
14  
15  
16  
17  
18  
19  
20  
21  
22  
23  
24  
25  
26  
27  
28  
29  
30  
31  
32  
33  
34  
35  
36  
37  
38  
39  
40  
41  
42  
43  
44  
45  
46  
47  
48  
49  
50  
51  
52  
53  
54  
55  
56  
57  
58  
59  
60

443 Affairs); Mark Compain, Danny Nelson and Richard Terrill (RSA); and NoDuff representatives  
444 Aaron Wood and Lars Millar.  
445 Finally, a thank you to the New Zealand Veterans who took the time and effort to complete a  
446 rather tedious questionnaire. Kia Kaha.

For peer review only

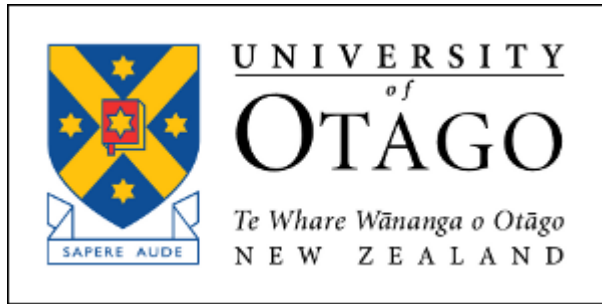

## The Psychological and Physical Health and Wellbeing of New Zealand Current and Former Service Personnel

We are researchers from the University of Otago, Massey University and AUT, and we are interested in learning more about ways to help current and former New Zealand service personnel maintain their wellbeing. While many personnel do very well during and after their deployment experiences, some can struggle with physical and mental health problems. We would like to know more about how to help identify when personnel might need extra support.

For this study, we would like to invite you to fill out a questionnaire, which will take about 45 minutes. Participation is completely voluntary and you may withdraw from the study at any time without any risk or disadvantage to you. You are under no obligation to answer all questions presented in it. You may skip any questions that you do not want to answer. All information will be kept confidential, and no material that could identify you will be used in any report on this study.

Please note that the survey is unclassified, and that all information and any comments are at the unclassified level. This survey is being conducted in compliance with DFO 3.14[5] Authority to Conduct Personnel Research.

If you would like more information, please contact David McBride on either 03 479 7208 or 027 253 5451.

Associate Professor David McBride  
Preventive and Social Medicine, University of Otago  
Phone: 027 253 5451  
Email: david.mcbride@otago.ac.nz

David is a LtCol in the RNZAMC and a reservist, but is carrying out this project in his University capacity. The NZDF will not have access to the data.

Other team members: Associate Professor Brian Cox, brian.cox@otago.ac.nz; Dr Emma Wyeth, emma.wyeth@otago.ac.nz; Professor Sarah Derrett, sarah.derrett@otago.ac.nz; Dr Gagan Gurung, gagan.gurung@otago.ac.nz; Dr Amy Richardson, amy.richardson@otago.ac.nz; Dr Dianne Gardner, D.H.Gardner@massey.ac.nz; Dr Shane Harvey, S.T.Harvey@massey.ac.nz; Dr Daniel Shepherd, Daniel.shepherd@aut.ac.nz; Brandon de Graaf, brandon.degraaf@otago.ac.nz

This study is being carried out with the support of Lottery Health and the War Pensions Medical Research Trust Fund. The study has received ethical approval from the Northern B Health and Disability Ethics Committee.

### Instructions for completing this survey:

- \* Please use Black or Blue pen only to complete this survey
- \* When completing Alpha Numeric data collection boxes for optimum accuracy, please print in capital letters and use the number formats and avoid contact with the edge of the box.

|   |   |   |   |   |   |   |   |   |   |   |   |   |
|---|---|---|---|---|---|---|---|---|---|---|---|---|
| A | B | C | D | E | F | G | H | I | J | K | L | M |
| N | O | P | Q | R | S | T | U | V | W | X | Y | Z |

|   |   |   |   |   |   |   |   |   |   |
|---|---|---|---|---|---|---|---|---|---|
| 0 | 1 | 2 | 3 | 4 | 5 | 6 | 7 | 8 | 9 |
|---|---|---|---|---|---|---|---|---|---|

- \* When completing a choice question please colour-in the whole circle.
  - 1                       2                       3                       4
- \* If an error is found after a question has been answered please colour-in the correct answer and place a tick next to the correct answer circle.
  - 1                       2                       3                       4 ✓
- \* The free text line is a single line for text entry only and will only accommodate text to the size of the line. Any other comments or written information placed anywhere else will be ignored and not captured



**SECTION A: PERSONAL DETAILS**

ID No 

|  |  |  |  |
|--|--|--|--|
|  |  |  |  |
|--|--|--|--|

1. Are you male or female?  Male  Female

2. What is your date of birth? 

|  |  |
|--|--|
|  |  |
|--|--|

 / 

|  |  |
|--|--|
|  |  |
|--|--|

 / 

|  |  |  |  |
|--|--|--|--|
|  |  |  |  |
|--|--|--|--|

  

day
month
year

3. Which ethnic group or groups do you belong to ?

New Zealand European

New Zealand Māori

Other (please specify) 

|  |
|--|
|  |
|--|

4. What is your service number? 

|  |  |  |  |  |  |  |  |
|--|--|--|--|--|--|--|--|
|  |  |  |  |  |  |  |  |
|--|--|--|--|--|--|--|--|

**SECTION B: JOB HISTORY**

1. With which branch of the NZDF did you serve?

Navy

Army

Airforce

2. What year did you first join the NZDF? 

|  |  |  |  |
|--|--|--|--|
|  |  |  |  |
|--|--|--|--|

  
year

3. Are you still a serving member of the NZDF ?  Yes  No

4. How many years did you serve? 

|  |  |
|--|--|
|  |  |
|--|--|

5. What is your current rank or what was your rank when you left the NZDF?

|  |
|--|
|  |
|--|

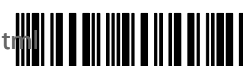

## SECTION C: HEALTH AND WELLBEING

ID No

|  |  |  |  |
|--|--|--|--|
|  |  |  |  |
|--|--|--|--|

## C1. HEALTH AND WELLBEING: RECENT HEALTH SYMPTOMS AND MULTI SYMPTOMS ILLNESS

We would like to know about your health in the last six months.

Please indicate whether or not you have suffered any of the following symptoms in the last six months, and if so, please indicate whether your symptoms were mild, moderate, or severe in nature.

Please don't spend too long thinking about each symptom, just provide the first response that comes to mind.

| Symptoms:<br>Have you experienced<br>Please colour in the circle if you have this symptom | Are the symptoms<br>Choose one and colour<br>the circle                                      | How long have you had the symptom?<br>Choose one and colour the circle               |
|-------------------------------------------------------------------------------------------|----------------------------------------------------------------------------------------------|--------------------------------------------------------------------------------------|
| Loss of concentration <input type="radio"/>                                               | <input type="radio"/> Mild<br><input type="radio"/> Moderate<br><input type="radio"/> Severe | <input type="radio"/> Less than 6 months<br><input type="radio"/> More than 6 months |
| Feeling distant from others <input type="radio"/>                                         | <input type="radio"/> Mild<br><input type="radio"/> Moderate<br><input type="radio"/> Severe | <input type="radio"/> Less than 6 months<br><input type="radio"/> More than 6 months |
| Unrefreshed after sleep <input type="radio"/>                                             | <input type="radio"/> Mild<br><input type="radio"/> Moderate<br><input type="radio"/> Severe | <input type="radio"/> Less than 6 months<br><input type="radio"/> More than 6 months |
| Forgetfulness <input type="radio"/>                                                       | <input type="radio"/> Mild<br><input type="radio"/> Moderate<br><input type="radio"/> Severe | <input type="radio"/> Less than 6 months<br><input type="radio"/> More than 6 months |
| Loss of interest in sex <input type="radio"/>                                             | <input type="radio"/> Mild<br><input type="radio"/> Moderate<br><input type="radio"/> Severe | <input type="radio"/> Less than 6 months<br><input type="radio"/> More than 6 months |
| Problems with sexual functioning <input type="radio"/>                                    | <input type="radio"/> Mild<br><input type="radio"/> Moderate<br><input type="radio"/> Severe | <input type="radio"/> Less than 6 months<br><input type="radio"/> More than 6 months |
| Sleeping difficulties <input type="radio"/>                                               | <input type="radio"/> Mild<br><input type="radio"/> Moderate<br><input type="radio"/> Severe | <input type="radio"/> Less than 6 months<br><input type="radio"/> More than 6 months |
| Avoiding doing things or<br>situations <input type="radio"/>                              | <input type="radio"/> Mild<br><input type="radio"/> Moderate<br><input type="radio"/> Severe | <input type="radio"/> Less than 6 months<br><input type="radio"/> More than 6 months |

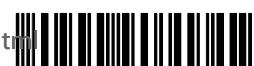

ID No

|  |  |  |  |
|--|--|--|--|
|  |  |  |  |
|--|--|--|--|

| Symptoms:<br>Have you experienced<br><i>Please colour in the circle if you have this symptom</i> | Are the symptoms<br><i>Choose one and colour the circle</i>                                  | How long have you had the symptom?<br><i>Choose one and colour the circle</i>        |
|--------------------------------------------------------------------------------------------------|----------------------------------------------------------------------------------------------|--------------------------------------------------------------------------------------|
| Fatigue <input type="radio"/>                                                                    | <input type="radio"/> Mild<br><input type="radio"/> Moderate<br><input type="radio"/> Severe | <input type="radio"/> Less than 6 months<br><input type="radio"/> More than 6 months |
| Irritability / Outbursts of anger <input type="radio"/>                                          | <input type="radio"/> Mild<br><input type="radio"/> Moderate<br><input type="radio"/> Severe | <input type="radio"/> Less than 6 months<br><input type="radio"/> More than 6 months |
| Distressing dreams <input type="radio"/>                                                         | <input type="radio"/> Mild<br><input type="radio"/> Moderate<br><input type="radio"/> Severe | <input type="radio"/> Less than 6 months<br><input type="radio"/> More than 6 months |
| Feeling jumpy / easily startled <input type="radio"/>                                            | <input type="radio"/> Mild<br><input type="radio"/> Moderate<br><input type="radio"/> Severe | <input type="radio"/> Less than 6 months<br><input type="radio"/> More than 6 months |
| Difficulty finding the right word <input type="radio"/>                                          | <input type="radio"/> Mild<br><input type="radio"/> Moderate<br><input type="radio"/> Severe | <input type="radio"/> Less than 6 months<br><input type="radio"/> More than 6 months |
| Increased sensitivity to noise <input type="radio"/>                                             | <input type="radio"/> Mild<br><input type="radio"/> Moderate<br><input type="radio"/> Severe | <input type="radio"/> Less than 6 months<br><input type="radio"/> More than 6 months |
| Alcohol intolerance <input type="radio"/>                                                        | <input type="radio"/> Mild<br><input type="radio"/> Moderate<br><input type="radio"/> Severe | <input type="radio"/> Less than 6 months<br><input type="radio"/> More than 6 months |
| Passing urine more often <input type="radio"/>                                                   | <input type="radio"/> Mild<br><input type="radio"/> Moderate<br><input type="radio"/> Severe | <input type="radio"/> Less than 6 months<br><input type="radio"/> More than 6 months |
| Shaking <input type="radio"/>                                                                    | <input type="radio"/> Mild<br><input type="radio"/> Moderate<br><input type="radio"/> Severe | <input type="radio"/> Less than 6 months<br><input type="radio"/> More than 6 months |
| Difficulty speaking <input type="radio"/>                                                        | <input type="radio"/> Mild<br><input type="radio"/> Moderate<br><input type="radio"/> Severe | <input type="radio"/> Less than 6 months<br><input type="radio"/> More than 6 months |

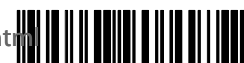

ID No

|  |  |  |  |
|--|--|--|--|
|  |  |  |  |
|--|--|--|--|

| <b>Symptoms:</b><br>Have you experienced<br><i>Please colour in the circle if you have this symptom</i> | <b>Are the symptoms</b><br><i>Choose one and colour the circle</i>                           | <b>How long have you had the symptom?</b><br><i>Choose one and colour the circle</i> |
|---------------------------------------------------------------------------------------------------------|----------------------------------------------------------------------------------------------|--------------------------------------------------------------------------------------|
| Night sweats <input type="radio"/>                                                                      | <input type="radio"/> Mild<br><input type="radio"/> Moderate<br><input type="radio"/> Severe | <input type="radio"/> Less than 6 months<br><input type="radio"/> More than 6 months |
| Increased sensitivity to smell <input type="radio"/>                                                    | <input type="radio"/> Mild<br><input type="radio"/> Moderate<br><input type="radio"/> Severe | <input type="radio"/> Less than 6 months<br><input type="radio"/> More than 6 months |
| Loss of or decrease in appetite <input type="radio"/>                                                   | <input type="radio"/> Mild<br><input type="radio"/> Moderate<br><input type="radio"/> Severe | <input type="radio"/> Less than 6 months<br><input type="radio"/> More than 6 months |
| Headaches <input type="radio"/>                                                                         | <input type="radio"/> Mild<br><input type="radio"/> Moderate<br><input type="radio"/> Severe | <input type="radio"/> Less than 6 months<br><input type="radio"/> More than 6 months |
| Dizziness or blackouts <input type="radio"/>                                                            | <input type="radio"/> Mild<br><input type="radio"/> Moderate<br><input type="radio"/> Severe | <input type="radio"/> Less than 6 months<br><input type="radio"/> More than 6 months |
| Increased sensitivity to light <input type="radio"/>                                                    | <input type="radio"/> Mild<br><input type="radio"/> Moderate<br><input type="radio"/> Severe | <input type="radio"/> Less than 6 months<br><input type="radio"/> More than 6 months |
| Loss of balance or coordination <input type="radio"/>                                                   | <input type="radio"/> Mild<br><input type="radio"/> Moderate<br><input type="radio"/> Severe | <input type="radio"/> Less than 6 months<br><input type="radio"/> More than 6 months |
| Ringling ears <input type="radio"/>                                                                     | <input type="radio"/> Mild<br><input type="radio"/> Moderate<br><input type="radio"/> Severe | <input type="radio"/> Less than 6 months<br><input type="radio"/> More than 6 months |
| Flatulence or burping <input type="radio"/>                                                             | <input type="radio"/> Mild<br><input type="radio"/> Moderate<br><input type="radio"/> Severe | <input type="radio"/> Less than 6 months<br><input type="radio"/> More than 6 months |
| Itchy or painful eyes <input type="radio"/>                                                             | <input type="radio"/> Mild<br><input type="radio"/> Moderate<br><input type="radio"/> Severe | <input type="radio"/> Less than 6 months<br><input type="radio"/> More than 6 months |

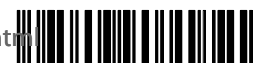

ID No

|  |  |  |  |
|--|--|--|--|
|  |  |  |  |
|--|--|--|--|

| Symptoms:<br>Have you experienced<br><i>Please colour in the circle if you have this symptom</i> | Are the symptoms<br><i>Choose one and colour the circle</i>                                  | How long have you had the symptom?<br><i>Choose one and colour the circle</i>        |
|--------------------------------------------------------------------------------------------------|----------------------------------------------------------------------------------------------|--------------------------------------------------------------------------------------|
| Double vision <input type="radio"/>                                                              | <input type="radio"/> Mild<br><input type="radio"/> Moderate<br><input type="radio"/> Severe | <input type="radio"/> Less than 6 months<br><input type="radio"/> More than 6 months |
| Loss of sensation in hands / feet <input type="radio"/>                                          | <input type="radio"/> Mild<br><input type="radio"/> Moderate<br><input type="radio"/> Severe | <input type="radio"/> Less than 6 months<br><input type="radio"/> More than 6 months |
| Constipation <input type="radio"/>                                                               | <input type="radio"/> Mild<br><input type="radio"/> Moderate<br><input type="radio"/> Severe | <input type="radio"/> Less than 6 months<br><input type="radio"/> More than 6 months |
| Persistent cough <input type="radio"/>                                                           | <input type="radio"/> Mild<br><input type="radio"/> Moderate<br><input type="radio"/> Severe | <input type="radio"/> Less than 6 months<br><input type="radio"/> More than 6 months |
| Unintended weight gain >4Kg <input type="radio"/>                                                | <input type="radio"/> Mild<br><input type="radio"/> Moderate<br><input type="radio"/> Severe | <input type="radio"/> Less than 6 months<br><input type="radio"/> More than 6 months |
| Rapid or pounding heartbeat <input type="radio"/>                                                | <input type="radio"/> Mild<br><input type="radio"/> Moderate<br><input type="radio"/> Severe | <input type="radio"/> Less than 6 months<br><input type="radio"/> More than 6 months |
| Tingling or burning sensation in hands / feet <input type="radio"/>                              | <input type="radio"/> Mild<br><input type="radio"/> Moderate<br><input type="radio"/> Severe | <input type="radio"/> Less than 6 months<br><input type="radio"/> More than 6 months |
| Dry mouth <input type="radio"/>                                                                  | <input type="radio"/> Mild<br><input type="radio"/> Moderate<br><input type="radio"/> Severe | <input type="radio"/> Less than 6 months<br><input type="radio"/> More than 6 months |
| Pain in several joints (no swelling or redness) <input type="radio"/>                            | <input type="radio"/> Mild<br><input type="radio"/> Moderate<br><input type="radio"/> Severe | <input type="radio"/> Less than 6 months<br><input type="radio"/> More than 6 months |
| Rash or skin irritation <input type="radio"/>                                                    | <input type="radio"/> Mild<br><input type="radio"/> Moderate<br><input type="radio"/> Severe | <input type="radio"/> Less than 6 months<br><input type="radio"/> More than 6 months |

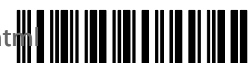

ID No

|  |  |  |  |
|--|--|--|--|
|  |  |  |  |
|--|--|--|--|

| <b>Symptoms:</b><br>Have you experienced<br><i>Please colour in the circle if you have this symptom</i> | <b>Are the symptoms</b><br><i>Choose one and colour the circle</i>                           | <b>How long have you had the symptom?</b><br><i>Choose one and colour the circle</i> |
|---------------------------------------------------------------------------------------------------------|----------------------------------------------------------------------------------------------|--------------------------------------------------------------------------------------|
| Diarrhoea <input type="radio"/>                                                                         | <input type="radio"/> Mild<br><input type="radio"/> Moderate<br><input type="radio"/> Severe | <input type="radio"/> Less than 6 months<br><input type="radio"/> More than 6 months |
| Low back pain <input type="radio"/>                                                                     | <input type="radio"/> Mild<br><input type="radio"/> Moderate<br><input type="radio"/> Severe | <input type="radio"/> Less than 6 months<br><input type="radio"/> More than 6 months |
| Skin infections <input type="radio"/>                                                                   | <input type="radio"/> Mild<br><input type="radio"/> Moderate<br><input type="radio"/> Severe | <input type="radio"/> Less than 6 months<br><input type="radio"/> More than 6 months |
| Mouth ulcers <input type="radio"/>                                                                      | <input type="radio"/> Mild<br><input type="radio"/> Moderate<br><input type="radio"/> Severe | <input type="radio"/> Less than 6 months<br><input type="radio"/> More than 6 months |
| Chest pain <input type="radio"/>                                                                        | <input type="radio"/> Mild<br><input type="radio"/> Moderate<br><input type="radio"/> Severe | <input type="radio"/> Less than 6 months<br><input type="radio"/> More than 6 months |
| Toothache <input type="radio"/>                                                                         | <input type="radio"/> Mild<br><input type="radio"/> Moderate<br><input type="radio"/> Severe | <input type="radio"/> Less than 6 months<br><input type="radio"/> More than 6 months |
| Stomach cramps <input type="radio"/>                                                                    | <input type="radio"/> Mild<br><input type="radio"/> Moderate<br><input type="radio"/> Severe | <input type="radio"/> Less than 6 months<br><input type="radio"/> More than 6 months |
| Nausea <input type="radio"/>                                                                            | <input type="radio"/> Mild<br><input type="radio"/> Moderate<br><input type="radio"/> Severe | <input type="radio"/> Less than 6 months<br><input type="radio"/> More than 6 months |
| Stiffness in several joints <input type="radio"/>                                                       | <input type="radio"/> Mild<br><input type="radio"/> Moderate<br><input type="radio"/> Severe | <input type="radio"/> Less than 6 months<br><input type="radio"/> More than 6 months |
| Indigestion <input type="radio"/>                                                                       | <input type="radio"/> Mild<br><input type="radio"/> Moderate<br><input type="radio"/> Severe | <input type="radio"/> Less than 6 months<br><input type="radio"/> More than 6 months |

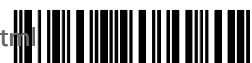

ID No

|  |  |  |  |
|--|--|--|--|
|  |  |  |  |
|--|--|--|--|

| Symptoms:<br>Have you experienced<br><i>Please colour in the circle if you have this symptom</i> | Are the symptoms<br><i>Choose one and colour the circle</i>                                  | How long have you had the symptom?<br><i>Choose one and colour the circle</i>        |
|--------------------------------------------------------------------------------------------------|----------------------------------------------------------------------------------------------|--------------------------------------------------------------------------------------|
| Muscle aches or pains <input type="radio"/>                                                      | <input type="radio"/> Mild<br><input type="radio"/> Moderate<br><input type="radio"/> Severe | <input type="radio"/> Less than 6 months<br><input type="radio"/> More than 6 months |
| Wheezing <input type="radio"/>                                                                   | <input type="radio"/> Mild<br><input type="radio"/> Moderate<br><input type="radio"/> Severe | <input type="radio"/> Less than 6 months<br><input type="radio"/> More than 6 months |
| Feeling feverish <input type="radio"/>                                                           | <input type="radio"/> Mild<br><input type="radio"/> Moderate<br><input type="radio"/> Severe | <input type="radio"/> Less than 6 months<br><input type="radio"/> More than 6 months |
| Tender / Painful swelling of lymph glands <input type="radio"/>                                  | <input type="radio"/> Mild<br><input type="radio"/> Moderate<br><input type="radio"/> Severe | <input type="radio"/> Less than 6 months<br><input type="radio"/> More than 6 months |
| Shortness of breath <input type="radio"/>                                                        | <input type="radio"/> Mild<br><input type="radio"/> Moderate<br><input type="radio"/> Severe | <input type="radio"/> Less than 6 months<br><input type="radio"/> More than 6 months |
| Sore throat <input type="radio"/>                                                                | <input type="radio"/> Mild<br><input type="radio"/> Moderate<br><input type="radio"/> Severe | <input type="radio"/> Less than 6 months<br><input type="radio"/> More than 6 months |

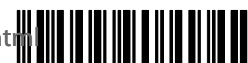

ID No

|  |  |  |  |
|--|--|--|--|
|  |  |  |  |
|--|--|--|--|

## C2. HEALTH AND WELLBEING: POST-TRAUMATIC STRESS

Below is a list of problems and complaints that people sometimes have in response to stressful life experiences. Please read each one carefully, then colour in the circle that indicates how much you have been bothered by that problem in the past month.

|                                                                                                                                                     | Not at all            | A little bit          | Moderately            | Quite a bit           | Extremely             |
|-----------------------------------------------------------------------------------------------------------------------------------------------------|-----------------------|-----------------------|-----------------------|-----------------------|-----------------------|
| 1. Repeated, disturbing memories, thoughts, or images of a stressful military experience?                                                           | <input type="radio"/> |
| 2. Repeated, disturbing dreams of a stressful military experience?                                                                                  | <input type="radio"/> |
| 3. Suddenly acting or feeling as if a stressful military experience were happening again (as if you were reliving it)?                              | <input type="radio"/> |
| 4. Feeling very upset when something reminded you of a stressful military experience?                                                               | <input type="radio"/> |
| 5. Having physical reactions (e.g., heart pounding, trouble breathing, or sweating) when something reminded you of a stressful military experience? | <input type="radio"/> |
| 6. Avoiding thinking about or talking about a stressful military experience or avoiding having feelings related to it?                              | <input type="radio"/> |
| 7. Avoiding activities or situations because they reminded you of a stressful military experience?                                                  | <input type="radio"/> |
| 8. Trouble remembering important parts of a stressful military experience?                                                                          | <input type="radio"/> |
| 9. Loss of interest in things that you used to enjoy?                                                                                               | <input type="radio"/> |
| 10. Feeling distant or cut off from other people?                                                                                                   | <input type="radio"/> |
| 11. Feeling emotionally numb or being unable to have loving feelings for those close to you?                                                        | <input type="radio"/> |
| 12. Feeling as if your future will somehow be cut short?                                                                                            | <input type="radio"/> |
| 13. Trouble falling or staying asleep?                                                                                                              | <input type="radio"/> |

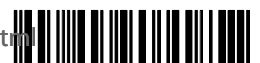



ID No

|  |  |  |  |
|--|--|--|--|
|  |  |  |  |
|--|--|--|--|

Not at all      A little bit      Moderately      Quite a bit      Extremely

14. Feeling irritable or having angry outbursts?  —  —  —  —

15. Having difficulty concentrating?  —  —  —  —

16. Being "super alert" or watchful on guard?  —  —  —  —

17. Feeling jumpy or easily startled?  —  —  —  —

**C3. HEALTH AND WELLBEING: SOCIAL SUPPORT**

Please indicate to what extent each statement describes your current relationships with other people. So, for example, if you feel a statement is very true of your current relationships, you would respond with a strongly agree. If you feel a statement clearly does not describe your relationships, you would respond with a strongly disagree.

Strongly Disagree      Disagree      Agree      Strongly Agree

1. There are people I can depend on to help me if I really need it.  —  —  —

2. I feel that I do not have close personal relationships with other people.  —  —  —

3. There is no one I can turn to for guidance in times of stress.  —  —  —

4. There are people who depend on me for help.  —  —  —

5. There are people who enjoy the same social activities I do.  —  —  —

6. Other people do not view me as competent.  —  —  —

7. I feel personally responsible for the well-being of another person.  —  —  —

8. I feel part of a group of people who share my attitudes and beliefs.  —  —  —

9. I do not think other people respect my skills and abilities.  —  —  —

10. If something went wrong, no one would come to my assistance.  —  —  —

11. I have close relationships that provide me with a sense of emotional security and well-being.  —  —  —

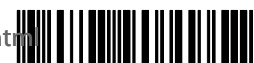

1  
2  
3  
4  
5  
6  
7  
8  
9  
10  
11  
12  
13  
14  
15  
16  
17  
18  
19  
20  
21  
22  
23  
24  
25  
26  
27  
28  
29  
30  
31  
32  
33  
34  
35  
36  
37  
38  
39  
40  
41  
42  
43  
44  
45  
46  
47  
48  
49  
50  
51  
52  
53  
54  
55  
56  
57  
58  
59  
60

ID No

Strongly Disagree      Disagree      Agree      Strongly Agree

12. There is someone I could talk to about important decisions in my life.  —  —  —

13. I have relationships where my competence and skill are recognized.  —  —  —

14. There is no one who shares my interests and concerns.  —  —  —

15. There is no one who really relies on me for their well-being.  —  —  —

16. There is a trustworthy person I could turn to for advice if I were having problems.  —  —  —

17. I feel a strong emotional bond with at least one other person.  —  —  —

18. There is no one I can depend on for aid if I really need it.  —  —  —

19. There is no one I feel comfortable talking about problems with.  —  —  —

20. There are people who admire my talents and abilities.  —  —  —

21. I lack a feeling of intimacy with another person.  —  —  —

22. There is no one who likes to do the things I do.  —  —  —

23. There are people who I can count on in an emergency.  —  —  —

24. No one needs me to care for them.  —  —  —

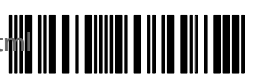

ID No

**C4. HEALTH AND WELLBEING: PSYCHOLOGICAL FLEXIBILITY AND COPING**

Below you will find a list of statements. Please rate how true each statement is for you by colouring the appropriate circle.

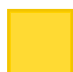

Never True    Very Seldom True    Seldom True    Sometimes True    Frequently True    Almost Always True    Always True

- 1. It's OK if I remember something unpleasant.  —  —  —  —  —  —
- 2. My painful experiences and memories make it difficult for me to live a life that I would value.  —  —  —  —  —  —
- 3. I'm afraid of my feelings.  —  —  —  —  —  —
- 4. I worry about not being able to control my worries and feelings.  —  —  —  —  —  —
- 5. My painful memories prevent me from having a fulfilling life.  —  —  —  —  —  —
- 6. I am in control of my life.  —  —  —  —  —  —
- 7. Emotions cause problems in my life.  —  —  —  —  —  —
- 8. It seems like most people are handling their lives better than I am.  —  —  —  —  —  —
- 9. Worries get in the way of my success.  —  —  —  —  —  —
- 10. My thoughts and feelings get in the way of how I want to live my life.  —  —  —  —  —  —

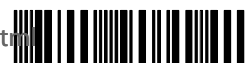

ID No

|  |  |  |  |
|--|--|--|--|
|  |  |  |  |
|--|--|--|--|

## C5. HEALTH AND WELLBEING: GENERAL HEALTH

We would like to know how you have been feeling over the past few weeks.

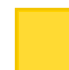

Please colour in the circle that most closely describes your experience in each question.

### Have you recently?

- |                                                   |                       |                       |                       |                            |
|---------------------------------------------------|-----------------------|-----------------------|-----------------------|----------------------------|
|                                                   | Better<br>than usual  | Same as<br>usual      | Less than<br>usual    | Much<br>less than<br>usual |
| 1. Been able to concentrate on what you're doing? | <input type="radio"/> | <input type="radio"/> | <input type="radio"/> | <input type="radio"/>      |
- |                                |                       |                       |                           |                            |
|--------------------------------|-----------------------|-----------------------|---------------------------|----------------------------|
|                                | Not at<br>all         | No more<br>than usual | Rather more<br>than usual | Much<br>more than<br>usual |
| 2. Lost much sleep over worry? | <input type="radio"/> | <input type="radio"/> | <input type="radio"/>     | <input type="radio"/>      |
- |                                                   |                       |                       |                           |                       |
|---------------------------------------------------|-----------------------|-----------------------|---------------------------|-----------------------|
|                                                   | More so<br>than usual | Same as<br>usual      | Less useful<br>than usual | Much less<br>useful   |
| 3. Felt you were playing a useful part in things? | <input type="radio"/> | <input type="radio"/> | <input type="radio"/>     | <input type="radio"/> |
- |                                                   |                       |                       |                       |                       |
|---------------------------------------------------|-----------------------|-----------------------|-----------------------|-----------------------|
|                                                   | More so<br>than usual | Same as<br>usual      | Less so<br>than usual | Much less<br>capable  |
| 4. Felt capable of making decisions about things? | <input type="radio"/> | <input type="radio"/> | <input type="radio"/> | <input type="radio"/> |
- |                                  |                       |                       |                           |                            |
|----------------------------------|-----------------------|-----------------------|---------------------------|----------------------------|
|                                  | Not at<br>all         | No more<br>than usual | Rather more<br>than usual | Much<br>more than<br>usual |
| 5. Felt constantly under strain? | <input type="radio"/> | <input type="radio"/> | <input type="radio"/>     | <input type="radio"/>      |
- |                                                  |                       |                       |                           |                            |
|--------------------------------------------------|-----------------------|-----------------------|---------------------------|----------------------------|
|                                                  | Not at<br>all         | No more<br>than usual | Rather more<br>than usual | Much<br>more than<br>usual |
| 6. Felt you couldn't overcome your difficulties? | <input type="radio"/> | <input type="radio"/> | <input type="radio"/>     | <input type="radio"/>      |
- |                                                          |                       |                       |                       |                            |
|----------------------------------------------------------|-----------------------|-----------------------|-----------------------|----------------------------|
|                                                          | More so<br>than usual | Same as<br>usual      | Less so<br>than usual | Much<br>less than<br>usual |
| 7. Been able to enjoy your normal day-to-day activities? | <input type="radio"/> | <input type="radio"/> | <input type="radio"/> | <input type="radio"/>      |
- |                                           |                       |                       |                       |                       |
|-------------------------------------------|-----------------------|-----------------------|-----------------------|-----------------------|
|                                           | More so<br>than usual | Same as<br>usual      | Less so<br>than usual | Much<br>less able     |
| 8. Been able to face up to your problems? | <input type="radio"/> | <input type="radio"/> | <input type="radio"/> | <input type="radio"/> |

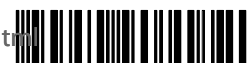

ID No

Not at all      No more than usual      Rather more than usual      Much more than usual

9. Been feeling unhappy and depressed?

— — —  — — —  — — —

10. Been losing confidence in yourself?

Not at all      No more than usual      Rather more than usual      Much more than usual

— — —  — — —  — — —

11. Been thinking of yourself as a worthless person?

Not at all      No more than usual      Rather more than usual      Much more than usual

— — —  — — —  — — —

12. Been feeling reasonably happy, all things considered?

More so than usual      About same as usual      Less so than usual      Much less than usual

— — —  — — —  — — —

**C6. HEALTH AND WELLBEING: GENERAL HEALTH**

Under each heading, please colour in the **ONE** circle that best describes your health **TODAY**.

**INTELLECTUAL ACTIVITIES**

- I have no problems with intellectual activities
- I have slight problems with intellectual activities
- I have moderate problems with intellectual activities
- I have severe problems with intellectual activities
- I am unable to perform intellectual activities

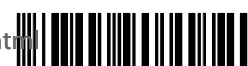

ID No

|  |  |  |  |
|--|--|--|--|
|  |  |  |  |
|--|--|--|--|

**C6. HEALTH AND WELLBEING: GENERAL HEALTH**

Under each heading, please colour in the **ONE** circle that best describes your health **TODAY**.

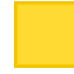**MOBILITY**

- I have no problems in walking about
- I have slight problems in walking about
- I have moderate problems in walking about
- I have severe problems in walking about
- I am unable to walk about

**SELFT-CARE**

- I have no problems washing or dressing myself
- I have slight problems washing or dressing myself
- I have moderate problems washing or dressing myself
- I have severe problems washing or dressing myself
- I am unable to wash or dress myself

**USUAL ACTIVITIES** (e.g. work, study, housework, family or leisure activities)

- I have no problems doing my usual activities
- I have slight problems doing my usual activities
- I have moderate problems doing my usual activities
- I have severe problems doing my usual activities
- I am unable to do my usual activities

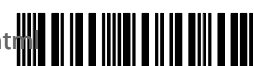

ID No

|  |  |  |  |
|--|--|--|--|
|  |  |  |  |
|--|--|--|--|

**PAIN / DISCOMFORT**

- I have no pain or discomfort
- I have slight pain or discomfort
- I have moderate pain or discomfort
- I have severe pain or discomfort
- I have extreme pain or discomfort

**ANXIETY / DEPRESSION**

- I am not anxious or depressed
- I am slightly anxious or depressed
- I am moderately anxious or depressed
- I am severely anxious or depressed
- I am extremely anxious or depressed

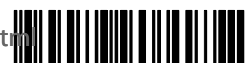

1  
2  
3  
4  
5  
6  
7  
8  
9  
10  
11  
12  
13  
14  
15  
16  
17  
18  
19  
20  
21  
22  
23  
24  
25  
26  
27  
28  
29  
30  
31  
32  
33  
34  
35  
36  
37  
38  
39  
40  
41  
42  
43  
44  
45  
46  
47  
48  
49  
50  
51  
52  
53  
54  
55  
56  
57  
58  
59  
60

ID No

- We would like to know how good or bad your health is TODAY.
- This scale is numbered from 0 to 100.
- 100 means the best health you can imagine.
- 0 means the worst health you can imagine.
- Mark an X on the scale to indicate how your health is TODAY.
- Now, please write the number you marked on the scale in the box below

**YOUR HEALTH TODAY =**

The best health  
you can imagine

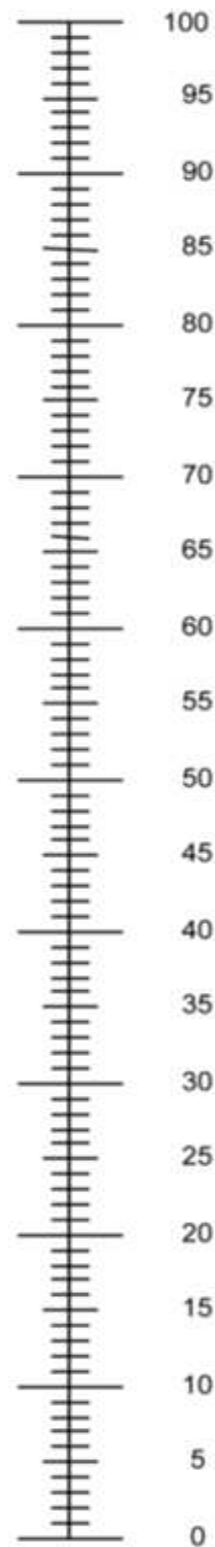

The worst health  
you can imagine

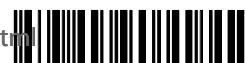



ID No

|  |  |  |  |
|--|--|--|--|
|  |  |  |  |
|--|--|--|--|

## C7. HEALTH AND WELLBEING: SLEEP CONDITION

The following questions relate to your usual sleep condition during the past month only.  
For each of the questions, colour in the one best response. Please answer all questions.

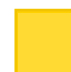

### Thinking about a typical night in the last month ...

1. How long does it take you to fall asleep?

- 0 - 15 minutes
- 16 - 30 minutes
- 31 - 45 minutes
- 46 - 60 minutes
- $\geq 61$  minutes

2. If you then wake up during the night ... how long are you awake for in total? (add all the awakenings up)

- 0 - 15 minutes
- 16 - 30 minutes
- 31 - 45 minutes
- 46 - 60 minutes
- $\geq 61$  minutes

3. How many nights a week do you have a problem with your sleep?

- 0 - 1
- 2
- 3
- 4
- 5 - 7

4. How would you rate your sleep quality?

- Very good
- Good
- Average
- Poor
- Very poor

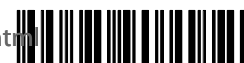

ID No

|  |  |  |  |
|--|--|--|--|
|  |  |  |  |
|--|--|--|--|

**Thinking about the past month, to what extent has poor sleep . . .**

5. Affected your mood, energy, or relationships?

- Not at all
- A little
- Somewhat
- Much
- Very much

6. Affected your concentration, productivity, or ability to stay awake?

- Not at all
- A little
- Somewhat
- Much
- Very much

7. Troubles you in general?

- Not at all
- A little
- Somewhat
- Much
- Very much

**Finally . . .**

8. How long have you had a problem with your sleep?

- I don't have a problem / < 1 mo
- 1 - 2 mo
- 3 - 6 mo
- 7 - 12 mo
- > 1 year

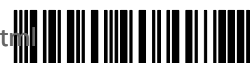

ID No

|  |  |  |  |
|--|--|--|--|
|  |  |  |  |
|--|--|--|--|

## C8. HEALTH AND WELLBEING: ALCOHOL AND DRUG USE

Because alcohol use can affect your health and can interfere with certain medications and treatments, it is important that we ask some questions about your use of alcohol. Your answers will remain confidential so please be honest.

Please colour in **one** circle that best describes your answer to each question.

1. How often do you have a drink containing alcohol?

- Never
- Monthly or less
- 2 - 4 times a month
- 2 - 3 times a week
- 4 or more times a week

2. How many standard drinks containing alcohol do you have on a typical day?

- 1 or 2
- 3 or 4
- 5 or 6
- 7, 8 to 9
- 10 or more

3. How often do you have six or more drinks on one occasion?

- Never
- Less than monthly
- Monthly
- Weekly
- Daily or almost daily

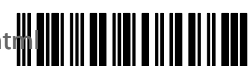

ID No

|  |  |  |  |
|--|--|--|--|
|  |  |  |  |
|--|--|--|--|

## C9. HEALTH AND WELLBEING: TRAUMATIC EXPOSURE

The following questions ask about events that may be extraordinarily stressful or disturbing for almost everyone. Please colour in the "Yes" or "No" circle to report what has happened to you.

If you answer "Yes" for an event, please answer any additional questions that are listed on the right side of the page to report: (1) whether you thought your life was in danger or you might be seriously injured; and (2) whether you were seriously injured.

If you answer "No" for an event, go on to the next event.

| Event                                                                                                                                                                                                                                         | Has this ever happened to you?                        | If the event happened, did you think your life was in danger or you might be seriously injured?                                                       | If the event happened, were you seriously injured?    |
|-----------------------------------------------------------------------------------------------------------------------------------------------------------------------------------------------------------------------------------------------|-------------------------------------------------------|-------------------------------------------------------------------------------------------------------------------------------------------------------|-------------------------------------------------------|
| 1. Have you ever served in a war zone, or have you ever served in a noncombat job that exposed you to war-related casualties (for example, as a medic or on graves registration duty)?                                                        | <input type="radio"/> No<br><input type="radio"/> Yes | If Yes, <br><input type="radio"/> No<br><input type="radio"/> Yes   | <input type="radio"/> No<br><input type="radio"/> Yes |
| 2. Have you ever been in a serious car accident, or a serious accident at work or somewhere else?                                                                                                                                             | <input type="radio"/> No<br><input type="radio"/> Yes | If Yes, <br><input type="radio"/> No<br><input type="radio"/> Yes  | <input type="radio"/> No<br><input type="radio"/> Yes |
| 3. Have you ever been in a major natural or technological disaster, such as fire, tornado, hurricane, flood, earthquake, or chemical spill?                                                                                                   | <input type="radio"/> No<br><input type="radio"/> Yes | If Yes, <br><input type="radio"/> No<br><input type="radio"/> Yes | <input type="radio"/> No<br><input type="radio"/> Yes |
| 4. Have you ever had a life-threatening illness such as cancer, a heart attack, leukemia, AIDS, multiple sclerosis, etc?                                                                                                                      | <input type="radio"/> No<br><input type="radio"/> Yes | If Yes, <br><input type="radio"/> No<br><input type="radio"/> Yes | <input type="radio"/> No<br><input type="radio"/> Yes |
| 5. Before age 18, were you ever physically punished or beaten by a parent, caretaker, or teacher so that: you were very frightened; or you thought you would be injured; or you received bruises, cuts, welts, lumps or other injuries?       | <input type="radio"/> No<br><input type="radio"/> Yes | If Yes, <br><input type="radio"/> No<br><input type="radio"/> Yes | <input type="radio"/> No<br><input type="radio"/> Yes |
| 6. Not including any punishments or beatings you already reported in <b>Question 5</b> , have you ever been attacked, beaten or mugged by anyone, including friends, family members or strangers?                                             | <input type="radio"/> No<br><input type="radio"/> Yes | If Yes, <br><input type="radio"/> No<br><input type="radio"/> Yes | <input type="radio"/> No<br><input type="radio"/> Yes |
| 7. Has anyone ever made or pressured you into having some type of unwanted sexual contact?<br><b>Note:</b> By sexual contact we mean any contact between someone else and your private parts or between you and someone else's private parts. | <input type="radio"/> No<br><input type="radio"/> Yes | If Yes, <br><input type="radio"/> No<br><input type="radio"/> Yes | <input type="radio"/> No<br><input type="radio"/> Yes |

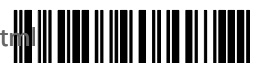

ID No

The following questions ask about events that may be extraordinarily stressful or disturbing for almost everyone. Please colour in the "Yes" or "No" circle to report what has happened to you.

If you answer "Yes" for an event, please answer any additional questions that are listed on the right side of the page to report: (1) whether you thought your life was in danger or you might be seriously injured; and (2) whether you were seriously injured.

If you answer "No" for an event, go on to the next event.

| Event                                                                                                                                                                                              | Has this ever happened to you?                        | If the event happened, did you think your life was in danger or you might be seriously injured? | If the event happened, were you seriously injured?    |
|----------------------------------------------------------------------------------------------------------------------------------------------------------------------------------------------------|-------------------------------------------------------|-------------------------------------------------------------------------------------------------|-------------------------------------------------------|
| 8. Have you ever been in any other situation in which you were seriously injured, or have you ever been in any other situation in which you feared you might be seriously injured or killed?       | <input type="radio"/> No<br><input type="radio"/> Yes | If Yes,<br>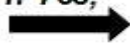   | <input type="radio"/> No<br><input type="radio"/> Yes |
| 9. Has a close family member or friend died violently, for example, in a serious car crash, mugging, or attack?                                                                                    | <input type="radio"/> No<br><input type="radio"/> Yes | If Yes,<br>   | <input type="radio"/> No<br><input type="radio"/> Yes |
| 10. Have you ever witnessed a situation in which someone was seriously injured or killed, or have you ever witnessed a situation in which you feared someone would be seriously injured or killed? | <input type="radio"/> No<br><input type="radio"/> Yes |                                                                                                 |                                                       |
| <b>Note:</b> Do not answer "YES" for any event you already reported in Questions 1-9.                                                                                                              |                                                       |                                                                                                 |                                                       |

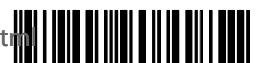

ID No 

|  |  |  |  |
|--|--|--|--|
|  |  |  |  |
|--|--|--|--|

**SECTION D: DEPLOYMENTS**

**D1.** Have you been on active deployment (war or peacekeeping)? This doesn't include training exercises or goodwill visits (flying the flag).

Yes

No ***If No, then GO TO SECTION E***

**D2.** In the table below please write where you were actively deployed and the year in which you were deployed. Remember that this doesn't include training exercises or goodwill visits (flying the flag).

**Deployment / mission:**

**Year of Deployment:**

|    | Deployment / mission: | Year of Deployment:                                                     |  |  |  |  |
|----|-----------------------|-------------------------------------------------------------------------|--|--|--|--|
| 1. |                       | <table border="1"><tr><td></td><td></td><td></td><td></td></tr></table> |  |  |  |  |
|    |                       |                                                                         |  |  |  |  |
| 2. |                       | <table border="1"><tr><td></td><td></td><td></td><td></td></tr></table> |  |  |  |  |
|    |                       |                                                                         |  |  |  |  |
| 3. |                       | <table border="1"><tr><td></td><td></td><td></td><td></td></tr></table> |  |  |  |  |
|    |                       |                                                                         |  |  |  |  |
| 4. |                       | <table border="1"><tr><td></td><td></td><td></td><td></td></tr></table> |  |  |  |  |
|    |                       |                                                                         |  |  |  |  |
| 5. |                       | <table border="1"><tr><td></td><td></td><td></td><td></td></tr></table> |  |  |  |  |
|    |                       |                                                                         |  |  |  |  |
| 6. |                       | <table border="1"><tr><td></td><td></td><td></td><td></td></tr></table> |  |  |  |  |
|    |                       |                                                                         |  |  |  |  |
| 7. |                       | <table border="1"><tr><td></td><td></td><td></td><td></td></tr></table> |  |  |  |  |
|    |                       |                                                                         |  |  |  |  |

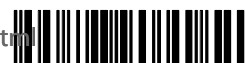

ID No

|  |  |  |  |
|--|--|--|--|
|  |  |  |  |
|--|--|--|--|

**SECTION E: FINAL PERSONAL DETAILS**

1. What is your current marital status?

- Married  Widowed
- De facto relationship  Single, never married
- Separated  Other (please specify)
- Divorced

|  |
|--|
|  |
|--|

2. Which category best describes the highest educational qualification you have completed?

- No qualifications
- Secondary school
- University degree or equivalent
- Other post-secondary school qualification

3. What is your current occupation?

- Paid employment full-time  Retired
- Paid employment part-time / casual  Not working
- Volunteer / community work  Unemployed
- Student  Other (please specify)
- Home duties

|  |
|--|
|  |
|--|

4. What is your total annual income (before tax)?

- \$20,000 or less
- \$20,001 - \$30,000
- \$30,001 - \$50,000
- \$50,001 - \$70,000
- \$70,001 - \$100,000
- \$100,001 or more
- Unsure

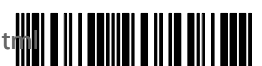

**Supplementary Table: Number of participants and EQ-VAS scores according to sample characteristics**

| <b>Exposure variable</b>       | <b>N (%)</b> | <b>Mean (SD)</b>   |
|--------------------------------|--------------|--------------------|
| <b>All</b>                     | 1767         | 74.4 (17.1)        |
| <b>Age group (years)</b>       |              |                    |
| 20-29                          | 136 (7.7)    | 77.7 (14.4)        |
| 30-39                          | 328 (18.6)   | 77.0 (16.2)        |
| 40-49                          | 438 (24.8)   | 76.1 (14.6)        |
| 50-59                          | 350 (19.8)   | 74.8 (16.6)        |
| 60-69                          | 285 (16.1)   | 71.4 (19.8)        |
| 70-79                          | 175 (9.9)    | 69.4 (19.4)        |
| 80+                            | 50 (2.8)     | 66.2 (20.3)        |
| Missing                        | 5 (0.3)      | 61.2 (22.1)        |
| <b>Gender</b>                  |              |                    |
| Female                         | 220 (12.5)   | <u>75.0</u> (16.9) |
| Male                           | 1520 (86.0)  | 74.4 (17.2)        |
| Missing                        | 27 (1.5)     | <u>70.3</u> (17.2) |
| <b>Ethnicity (prioritised)</b> |              |                    |
| NZ European                    | 1382 (78.2)  | 74.4 (17.1)        |
| Māori                          | 245 (13.9)   | 75.6 (16.1)        |
| Other                          | 140 (7.9)    | 71.5 (19.3)        |
| <b>Service years</b>           |              |                    |
| 0-9                            | 339 (19.2)   | 69.9 (19.7)        |
| 10-19                          | 478 (27.1)   | 74.5 (17.9)        |
| 20-29                          | 530 (30.0)   | 75.3 (15.9)        |
| 30-39                          | 254 (14.4)   | 76.3 (14.6)        |
| 40+                            | 69 (3.9)     | 75.4 (16.4)        |
| Missing                        | 97 (5.5)     | 78.8 (14.2)        |
| <b>Deployment (ever)</b>       |              |                    |
| No                             | 288 (16.3)   | 69.5 (19.9)        |
| Yes                            | 1458 (82.5)  | 75.3 (16.4)        |
| Missing                        | 21 (1.2)     | 75.6 (14.6)        |
| <b>GHQ12 Score</b>             |              |                    |
| 0-9                            | 652 (36.9)   | 82.0 (12.6)        |
| 10-19                          | 972 (55.0)   | 72.3 (16.0)        |
| 20-29                          | 123 (7.0)    | 54.3 (20.3)        |
| 30+                            | 18 (1.0)     | 46.2 (24.4)        |
| Missing                        | 2 (0.1)      | -                  |

\*sub-scores not used in multivariable models.



## Supplementary table contd.

| <b>Social support full score</b>   |      |                    |
|------------------------------------|------|--------------------|
| 24-29                              | 0    | 0 -                |
| 30-39                              | 3    | (0.2) 66.7 (15.3)  |
| 40-49                              | 15   | (0.8) 44.5 (22.5)  |
| 50-59                              | 97   | (5.5) 62.4 (21.8)  |
| 60-69                              | 351  | (19.9) 69.0 (18.2) |
| 70-79                              | 643  | (36.4) 75.1 (15.0) |
| 80-89                              | 409  | (23.1) 78.0 (15.0) |
| 90-96                              | 235  | (13.3) 81.9 (13.9) |
| Missing                            | 14   | (0.8) 58.1 (25.6)  |
| <b>Social support sub-scores</b>   |      |                    |
| <b>Attachment*</b>                 |      |                    |
| 4-7                                | 51   | (3.5) 61.4 (23.4)  |
| 8-11                               | 516  | (29.2) 68.7 (18.0) |
| 12-16                              | 1193 | (67.5) 77.5 (15.5) |
| Missing                            | 7    | (0.4) 61.0 (19.7)  |
| <b>Social integration*</b>         |      |                    |
| 4-7                                | 20   | (1.1) 56.2 (25.1)  |
| 8-11                               | 429  | (24.3) 67.1 (19.4) |
| 12-16                              | 1309 | (74.8) 77.1 (15.2) |
| Missing                            | 9    | (0.5) 58.7 (21.5)  |
| <b>Reassurance of worth*</b>       |      |                    |
| 4-7                                | 37   | (2.1) 59.1 (19.5)  |
| 8-11                               | 504  | (28.5) 69.0 (19.1) |
| 12-16                              | 1215 | (68.8) 77.2 (15.2) |
| Missing                            | 11   | (0.6) 62.0 (24.9)  |
| <b>Reliable Alliance*</b>          |      |                    |
| 4-7                                | 20   | (1.1) 49.6 (22.2)  |
| 8-11                               | 251  | (14.2) 66.9 (20.1) |
| 12-16                              | 1489 | (84.3) 76.0 (15.9) |
| Missing                            | 7    | (0.4) 61.0 (19.7)  |
| <b>Guidance sub-score*</b>         |      |                    |
| 4-7                                | 36   | (2.0) 59.2 (22.2)  |
| 8-11                               | 387  | (21.9) 68.7 (18.9) |
| 12-16                              | 1337 | (75.7) 76.6 (15.7) |
| Missing                            | 7    | (0.4) 54.6 (21.6)  |
| <b>Opportunity for nurturance*</b> |      |                    |
| 4-7                                | 29   | (1.6) 69.3 (18.9)  |
| 8-11                               | 413  | (23.4) 71.9 (18.8) |
| 12-16                              | 1316 | (74.5) 75.4 (16.4) |
| Missing                            | 9    | (0.5) 58.7 (21.5)  |

## Supplementary table, contd.

**Psychological flexibility score  
(AAQii score).**

|         |            |             |
|---------|------------|-------------|
| 10-19   | 5 (0.3)    | 23.2 (13.8) |
| 20-29   | 40 (2.3)   | 49.1 (22.1) |
| 30-39   | 147 (8.3)  | 63.0 (18.6) |
| 40-49   | 43 (24.7)  | 68.5 (16.8) |
| 50-59   | 664 (37.6) | 77.1 (13.9) |
| 60-70   | 457 (25.9) | 82.5 (13.5) |
| Missing | 1 (1.0)    | 69.6 (20.5) |

**Sleep Condition Indicator (SCI score)**

|         |            |             |
|---------|------------|-------------|
| 0 to <2 | 67 (3.8)   | 51.2 (22.3) |
| 2 to <4 | 264 (14.9) | 62.2 (19.5) |
| 4 to <6 | 646 (36.6) | 74.3 (14.6) |
| 6 to <8 | 384 (21.7) | 77.6 (14.2) |
| 8 to 10 | 386 (21.8) | 83.5 (12.2) |
| Missing | 20 (1.1)   | 77.3 (12.8) |

**AUDIT-C score**

|               |            |             |
|---------------|------------|-------------|
| Non-hazardous | 776 (43.9) | 74.0 (17.4) |
| Hazardous     | 915 (51.8) | 74.6 (16.9) |
| Missing       | 76 (4.3)   | 75.0 (17.0) |

**Brief Trauma Questionnaire  
(DSM-IV criteria)**

|             |             |             |
|-------------|-------------|-------------|
| Not exposed | 544 (30.8)  | 78.3 (15.1) |
| Exposed     | 1210 (68.5) | 72.5 (17.8) |
| Missing     | 13 (0.7)    | 80.6 (8.1)  |

STROBE Statement—Checklist of items that should be included in reports of *cross-sectional studies*

|                              | Item No | Recommendation                                                                                                                                                                                                                                                                                                                                                                                                                                                                              |
|------------------------------|---------|---------------------------------------------------------------------------------------------------------------------------------------------------------------------------------------------------------------------------------------------------------------------------------------------------------------------------------------------------------------------------------------------------------------------------------------------------------------------------------------------|
| <b>Title and abstract</b>    | 1       | Indicate the study's design with a commonly used term in the title or the abstract.<br><b>Yes, a cross sectional study, p1 title.</b><br>(b) Provide in the abstract an informative and balanced summary of what was done and what was found <b>Background, results and conclusions, p 1</b>                                                                                                                                                                                                |
| <b>Introduction</b>          |         |                                                                                                                                                                                                                                                                                                                                                                                                                                                                                             |
| Background/rationale         | 2       | Explain the scientific background and rationale for the investigation being reported<br><b>Introduction p2.</b>                                                                                                                                                                                                                                                                                                                                                                             |
| Objectives                   | 3       | State specific objectives, including any prespecified hypotheses <b>p2, lines 59 and 60</b>                                                                                                                                                                                                                                                                                                                                                                                                 |
| <b>Methods</b>               |         |                                                                                                                                                                                                                                                                                                                                                                                                                                                                                             |
| Study design                 | 4       | Present key elements of study design early in the paper <b>p2 line 62 to page 5 line 145</b>                                                                                                                                                                                                                                                                                                                                                                                                |
| Setting                      | 5       | Describe the setting, locations, and relevant dates, including periods of recruitment, exposure, follow-up, and data collection <b>Participants, page2 line 63-page 3 line 83.</b>                                                                                                                                                                                                                                                                                                          |
| Participants                 | 6       | (a) Give the eligibility criteria, and the sources and methods of selection of participants <b>page 2 line 64 to page 3, line 68.</b>                                                                                                                                                                                                                                                                                                                                                       |
| Variables                    | 7       | Clearly define all outcomes, exposures, predictors, potential confounders, and effect modifiers. Give diagnostic criteria, if applicable <b>Questionnaire, pp 3-5.</b>                                                                                                                                                                                                                                                                                                                      |
| Data sources/<br>measurement | 8*      | For each variable of interest, give sources of data and details of methods of assessment (measurement). Describe comparability of assessment methods if there is more than one group <b>as above</b>                                                                                                                                                                                                                                                                                        |
| Bias                         | 9       | Describe any efforts to address potential sources of bias <b>Methods, page 3. Lines 76-83.</b>                                                                                                                                                                                                                                                                                                                                                                                              |
| Study size                   | 10      | Explain how the study size was arrived at <b>p5 line 137</b>                                                                                                                                                                                                                                                                                                                                                                                                                                |
| Quantitative variables       | 11      | Explain how quantitative variables were handled in the analyses. If applicable, describe which groupings were chosen and why Cases defined through the <b>Multivariable logistic regression with the EQ-Visual analogue scale as the outcome measure, p5 lines 131-136</b>                                                                                                                                                                                                                  |
| Statistical methods          | 12      | (a) Describe all statistical methods, including those used to control for confounding <b>Backward elimination process p5 lines 134-135</b><br>(b) Describe any methods used to examine subgroups and interactions <b>By multivariable logistic regression, p5 as above</b><br>(c) Explain how missing data were addressed <b>p4 lines 122-125</b><br>(d) If applicable, describe analytical methods taking account of sampling strategy<br>N/A<br>(e) Describe any sensitivity analyses N/A |
| <b>Results</b>               |         |                                                                                                                                                                                                                                                                                                                                                                                                                                                                                             |
| Participants                 | 13*     | (a) Report numbers of individuals at each stage of study—eg numbers potentially eligible, examined for eligibility, confirmed eligible, included in the study, completing follow-up, and analysed <b>Potentially eligible lines 68-73 p 3</b><br>(b) Give reasons for non-participation at each stage N/A<br>(c) Consider use of a flow diagram N/A                                                                                                                                         |

|                          |     |                                                                                                                                                                                                                                                                                                                                                                                                                                                                                                                                                                             |
|--------------------------|-----|-----------------------------------------------------------------------------------------------------------------------------------------------------------------------------------------------------------------------------------------------------------------------------------------------------------------------------------------------------------------------------------------------------------------------------------------------------------------------------------------------------------------------------------------------------------------------------|
| Descriptive data         | 14* | (a) Give characteristics of study participants (eg demographic, clinical, social) and information on exposures and potential confounders <b>page 5 et seq, table 1</b><br>(b) Indicate number of participants with missing data for each variable of interest ' <b>n used</b> ' columns <b>tables 2 and 3.</b>                                                                                                                                                                                                                                                              |
| Outcome data             | 15* | Report numbers of outcome events or summary measures <b>as per tables</b>                                                                                                                                                                                                                                                                                                                                                                                                                                                                                                   |
| Main results             | 16  | (a) Give unadjusted estimates and, if applicable, confounder-adjusted estimates and their precision (eg, 95% confidence interval). Make clear which confounders were adjusted for and why they were included <b>Tables, adjusted for age, sex, service years and deployment status.</b><br>(b) Report category boundaries when continuous variables were categorized. <b>Independent variables, p 3 and 4, EQ-VAS is a continuous scale.</b><br>(c) If relevant, consider translating estimates of relative risk into absolute risk for a meaningful time period <b>N/A</b> |
| Other analyses           | 17  | Report other analyses done—eg analyses of subgroups and interactions, and sensitivity analyses <b>N/A</b>                                                                                                                                                                                                                                                                                                                                                                                                                                                                   |
| <b>Discussion</b>        |     |                                                                                                                                                                                                                                                                                                                                                                                                                                                                                                                                                                             |
| Key results              | 18  | Summarise key results with reference to study objectives <b>Discussion, p11 first para</b>                                                                                                                                                                                                                                                                                                                                                                                                                                                                                  |
| Limitations              | 19  | Discuss limitations of the study, taking into account sources of potential bias or imprecision. Discuss both direction and magnitude of any potential bias <b>Discussion lines 215 et seq.</b>                                                                                                                                                                                                                                                                                                                                                                              |
| Interpretation           | 20  | Give a cautious overall interpretation of results considering objectives, limitations, multiplicity of analyses, results from similar studies, and other relevant evidence <b>Discussion, p12 lines 230 et seq.</b>                                                                                                                                                                                                                                                                                                                                                         |
| Generalisability         | 21  | Discuss the generalisability (external validity) of the study results <b>p17, line 215 et seq.</b>                                                                                                                                                                                                                                                                                                                                                                                                                                                                          |
| <b>Other information</b> |     |                                                                                                                                                                                                                                                                                                                                                                                                                                                                                                                                                                             |
| Funding                  | 22  | Give the source of funding and the role of the funders for the present study and, if applicable, for the original study on which the present article is based <b>Funding, p18</b>                                                                                                                                                                                                                                                                                                                                                                                           |

\*Give information separately for exposed and unexposed groups.

**Note:** An Explanation and Elaboration article discusses each checklist item and gives methodological background and published examples of transparent reporting. The STROBE checklist is best used in conjunction with this article (freely available on the Web sites of PLoS Medicine at <http://www.plosmedicine.org/>, Annals of Internal Medicine at <http://www.annals.org/>, and Epidemiology at <http://www.epidem.com/>). Information on the STROBE Initiative is available at [www.strobe-statement.org](http://www.strobe-statement.org).

# BMJ Open

## Factors associated with self-reported health among New Zealand military veterans: a cross-sectional study.

|                                 |                                                                                                                                                                                                                                                                                                                                                                                                                                                                                                                                                                                                                                                                                                                                        |
|---------------------------------|----------------------------------------------------------------------------------------------------------------------------------------------------------------------------------------------------------------------------------------------------------------------------------------------------------------------------------------------------------------------------------------------------------------------------------------------------------------------------------------------------------------------------------------------------------------------------------------------------------------------------------------------------------------------------------------------------------------------------------------|
| Journal:                        | <i>BMJ Open</i>                                                                                                                                                                                                                                                                                                                                                                                                                                                                                                                                                                                                                                                                                                                        |
| Manuscript ID                   | bmjopen-2021-056916.R2                                                                                                                                                                                                                                                                                                                                                                                                                                                                                                                                                                                                                                                                                                                 |
| Article Type:                   | Original research                                                                                                                                                                                                                                                                                                                                                                                                                                                                                                                                                                                                                                                                                                                      |
| Date Submitted by the Author:   | 18-Apr-2022                                                                                                                                                                                                                                                                                                                                                                                                                                                                                                                                                                                                                                                                                                                            |
| Complete List of Authors:       | McBride, David; University of Otago Dunedin School of Medicine, Department of Preventive and Social Medicine<br>Samaranayaka, Ariyapala; University of Otago Division of Health Sciences, Biostatistics Centre<br>Richardson, Amy; University of Otago Dunedin School of Medicine, Preventive and Social Medicine<br>Gardner, D; Massey University, Department of Psychology<br>Shepherd, Daniel; Auckland University of Technology, Health Sciences<br>Wyeth, Emma; University of Otago, Ngāi Tahu Māori Health Research Unit<br>de Graaf, Brandon; University of Otago Dunedin School of Medicine, Injury Prevention Research Unit<br>Derrett, Sarah; University of Otago Dunedin School of Medicine, Preventive and Social Medicine |
| <b>Primary Subject Heading</b>: | Epidemiology                                                                                                                                                                                                                                                                                                                                                                                                                                                                                                                                                                                                                                                                                                                           |
| Secondary Subject Heading:      | Occupational and environmental medicine, Public health                                                                                                                                                                                                                                                                                                                                                                                                                                                                                                                                                                                                                                                                                 |
| Keywords:                       | EPIDEMIOLOGY, OCCUPATIONAL & INDUSTRIAL MEDICINE, Health & safety < HEALTH SERVICES ADMINISTRATION & MANAGEMENT, Risk management < HEALTH SERVICES ADMINISTRATION & MANAGEMENT, MENTAL HEALTH, Musculoskeletal disorders < ORTHOPAEDIC & TRAUMA SURGERY                                                                                                                                                                                                                                                                                                                                                                                                                                                                                |
|                                 |                                                                                                                                                                                                                                                                                                                                                                                                                                                                                                                                                                                                                                                                                                                                        |

SCHOLARONE™  
Manuscripts

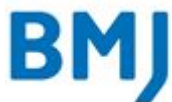

I, the Submitting Author has the right to grant and does grant on behalf of all authors of the Work (as defined in the below author licence), an exclusive licence and/or a non-exclusive licence for contributions from authors who are: i) UK Crown employees; ii) where BMJ has agreed a CC-BY licence shall apply, and/or iii) in accordance with the terms applicable for US Federal Government officers or employees acting as part of their official duties; on a worldwide, perpetual, irrevocable, royalty-free basis to BMJ Publishing Group Ltd ("BMJ") its licensees and where the relevant Journal is co-owned by BMJ to the co-owners of the Journal, to publish the Work in this journal and any other BMJ products and to exploit all rights, as set out in our [licence](#).

The Submitting Author accepts and understands that any supply made under these terms is made by BMJ to the Submitting Author unless you are acting as an employee on behalf of your employer or a postgraduate student of an affiliated institution which is paying any applicable article publishing charge ("APC") for Open Access articles. Where the Submitting Author wishes to make the Work available on an Open Access basis (and intends to pay the relevant APC), the terms of reuse of such Open Access shall be governed by a Creative Commons licence – details of these licences and which [Creative Commons](#) licence will apply to this Work are set out in our licence referred to above.

Other than as permitted in any relevant BMJ Author's Self Archiving Policies, I confirm this Work has not been accepted for publication elsewhere, is not being considered for publication elsewhere and does not duplicate material already published. I confirm all authors consent to publication of this Work and authorise the granting of this licence.

1  
2  
3 1 **FACTORS ASSOCIATED WITH SELF-REPORTED HEALTH AMONG NEW ZEALAND**  
4  
5 2 **MILITARY VETERANS: A CROSS-SECTIONAL STUDY**

6  
7 3 David McBride,<sup>1</sup> Ari Samaranayaka<sup>2</sup>, Amy Richardson,<sup>1</sup> Dianne Gardner,<sup>3</sup> Daniel Shepherd,<sup>4</sup>  
8  
9 4 Emma H. Wyeth<sup>5</sup>, Brandon deGraaf,<sup>6</sup> Sarah Derrett.<sup>1</sup>

10  
11 5 <sup>1</sup>Department of Preventive and Social Medicine, Dunedin School of Medicine, University of  
12  
13 6 Otago, New Zealand.

14  
15 7 <sup>2</sup>Biostatistics Centre, Division of Health Sciences, University of Otago, Dunedin, New Zealand.

16  
17 8 <sup>3</sup>School of Psychology, Massey University, New Zealand.

18  
19 9 <sup>4</sup>Department of Psychology, Auckland University of Technology, New Zealand.

20  
21 10 <sup>5</sup>Ngāi Tahu Māori Health Research Unit, Department of Preventive and Social Medicine,  
22  
23 11 Dunedin School of Medicine, University of Otago, New Zealand.

24  
25 12 <sup>6</sup>Injury Prevention Research Unit, Department of Preventive and Social Medicine, Dunedin  
26  
27 13 School of Medicine, University of Otago, New Zealand.

28  
29 14 **Keywords:**

30  
31 15 Military Medicine

32  
33 16 Quality of Life

34  
35 17 Risk Factors

36  
37 18 Protective Factors

38  
39 19 Point Prevalence

40  
41 20 **Word count**

42  
43 21 3132

44  
45 22 **Corresponding Author:**

46  
47 23 David McBride, Department of Preventive and Social Medicine, Adams Building, 18 Frederick  
48  
49 24 Street, Dunedin 9017, New Zealand.

50  
51 25 Email: [david.mcbride@otago.ac.nz](mailto:david.mcbride@otago.ac.nz)

52  
53 26 Phone: +64 3 479 7208

54  
55 27 Fax +64 3 479 7298

56  
57 28

1  
2 29 **ABSTRACT**  
3

4 30 **Objective**

5 31 To identify factors associated with better or poorer self-reported health status in New Zealand  
6  
7 32 military Veterans.

8  
9 33 **Design**

10 34 A cross-sectional survey.

11  
12 35 **Participants**

13 36 The participants of interest were the 3,874 currently serving Veterans who had been deployed  
14  
15 37 to a conflict zone, but all Veterans were eligible to participate.

16  
17 38 **Study variables**

18 39 The EQ-5D-5L, asking about problems across five dimensions (mobility, self-care, usual  
19  
20 40 activities, pain or discomfort, and anxiety or depression), with five levels of severity (e.g. no,  
21  
22 41 slight, moderate, severe or extreme problems), also containing a visual analogue scale (EQ-  
23  
24 42 VAS), scaled from 0 (worst) to 100 (best) imagined health, assessed health status. Hypothetical  
25  
26 43 relationships with better health were positive social support, sleep and psychological  
27  
28 44 flexibility; with poorer health, post-traumatic stress, exposure to psychological trauma,  
29  
30 45 distress and hazardous drinking.

31  
32 46 **Results:**

33 47 The EQ5-D was completed by 1767 Veterans, 1009 serving, a response rate of 26% from that  
34  
35 48 group, 1767 completing the EQ5-D, 1458 who had deployed, 288 who had not, and the 21  
36  
37 49 who did not provide deployment data. Of these 247 were not used in the analysis due to  
38  
39 50 missing values in one or more variables, leaving 1,520 for analysis.

40 51 A significantly higher proportion of Veterans reported 'any problems' rather than 'no  
41  
42 52 problems' with four EQ-5D dimensions: mobility, self-care, usual activities and pain or  
43  
44 53 discomfort, but no difference in anxiety or depression. Age, length of service, deployment,  
45  
46 54 psychological flexibility and better sleep quality were associated with higher EQ-VAS scores;  
47  
48 55 distress with lower EQ-VAS scores.

49  
50 56 **Conclusion:**

51 57 In this sample of New Zealand Veterans, psychological flexibility and good sleep are associated  
52  
53 58 with better self-rated health, and distress and poor sleep with diminished health. These  
54  
55 59 factors might be used as sentinel health indicators in assessing Veteran health status, and  
56  
57 60 cognitive behavioural therapy encompassing these domains may be useful in improving the  
58  
59 61 health of New Zealand Veterans.  
60



1  
2 **62 Keywords:**

3  
4 63 Self-rated health, wellbeing, EQ-5D, Veterans, deployment, military, risk factors.

5  
6 **64 Strengths and limitations of this study**

- 7  
8  
9 65 • Many studies of Veterans have focused on adverse outcomes, but we have been able  
10  
11 66 to focus on a holistic measure of 'health'.  
12  
13 67 • The study was sufficiently powered to detect important relationships indicating  
14  
15 68 opportunities for intervention.  
16  
17 69 • The exact response rate is unknown, and sampling bias may be a limitation.  
18  
19 70 • The cross-sectional design means that we cannot explore cause and effect  
20  
21 71 relationships.

22  
23 **72 INTRODUCTION**

24  
25 73 The three major events in the military life course are entry to military service, deployment on  
26  
27 74 active service and transition back to civilian life. On entry, soldiers, sailors and air personnel  
28  
29 75 are subject to a selection process to ensure, as far as possible, good physical and mental  
30  
31 76 health, giving rise to the 'healthy soldier effect,' with service personnel being, on average,  
32  
33 77 healthier than the general population.[1] However, the physical and psychological stressors  
34  
35 78 of military service have been found to erode this effect.[2]

36  
37 79 The physical stressors have a particular impact on the lower limb, with load carriage, high  
38  
39 80 intensity training and the design of footwear being implicated in injury causation.[3] A military  
40  
41 81 career also increases opportunities for psychological trauma, and post-traumatic stress  
42  
43 82 disorder (PTSD) has been identified as the 'signature injury' of United States service men and  
44  
45 83 women deployed to Afghanistan and Iraq.[4]

46  
47 84 A focus on adverse health events in the literature[5] means that wellbeing is relatively  
48  
49 85 overlooked. In the long run, military service has been found to have positive effects.[6,7]  
50  
51 86 Good health after service does, however, depend on the success of the 'military civilian  
52  
53 87 transition', a complex process for which models have been developed.[8] Health problems  
54  
55 88 developed in service, difficulty in assuming a post-service identity and many other factors  
56  
57 89 contribute to health and wellbeing outcomes.[8] In New Zealand, military Veterans can only  
58  
59 90 access assistance from New Zealand Veteran's Affairs (NZVA) if they have undertaken  
60  
61 91 'qualifying operational service' as defined by the Veteran Support Act 2014,[9] thus being  
62  
63 92 Veterans in a legal sense. NZVA support some 12,000 Veterans, with an average age of 80  
64  
65 93 years, 5000 being actively case managed.[10] The majority will have seen operational service  
66  
67 94 in Korea, Borneo, Malaya and Vietnam. Post-Vietnam, smaller numbers deployed on United

1  
2 95 Nations and other missions, but the tempo of operations rose with the deployment to  
3  
4 96 Bosnia in 1992, and some 9,000-10,000 'legal' Veterans deployed between then and the  
5  
6 97 withdrawal of New Zealand troops from Afghanistan in 2021. The Ministerial Veteran's  
7  
8 98 Health Advisory Panel, established under the Veteran Support Act, are specifically charged  
9  
10 99 with funding research on this 'contemporary Veteran' group, NZVA acknowledging that they  
11  
12 100 "have had different experiences, and have different needs, compared to the older veterans.  
13  
14 101 They are likely to have served in a number of deployments during their career, and come to  
15  
16 102 us with more complex health issues." [10]

17 103 The aims of this study were therefore to describe self-reported health among these Veterans,  
18  
19 104 and identify factors associated with better or poorer health.

### 20 105 **Veteran and public involvement**

21 106 The Ministerial Veterans Health Advisory Panel, [10] commissioned the study and advised on  
22  
23 107 the design. We also formed a steering group with representatives from the New Zealand  
24  
25 108 Defence Force, New Zealand Veterans Affairs, the Royal New Zealand Returned and Services  
26  
27 109 Association (RSA) [11] and No Duff, [12] a charity providing first response support to Veterans  
28  
29 110 and their families. We also consulted with the Ngāi Tahu Research Consultation Committee in  
30  
31 111 order to assess the importance of the project to Māori, New Zealand's indigenous population.  
32  
33 112 During consultation we undertook to inform the Veteran community before releasing the  
34  
35 113 results, to which end a link to the paper will be posted on the military social media sites where  
36  
37 114 the study was advertised, and to give all NZ Veterans, defined as anyone who had served in  
38  
39 115 the military, an opportunity to participate. Participants were not recruited as patients.

## 40 116 **METHODS**

### 41 117 **Participants**

42  
43 118 Potential participants were currently serving Veterans, as indicated by holding the New  
44  
45 119 Zealand Operational Service Medal at the time of the survey, a total of 3,874 personnel at that  
46  
47 120 time; retired 'legal' Veterans in the community; and Veterans who had served, but had not  
48  
49 121 deployed to a conflict. Data were collected via an online survey, a postal version being  
50  
51 122 available on request. There is no comprehensive Veteran registry, however in July 2018, a link  
52  
53 123 to the online questionnaire was sent by email to the 3,874 currently serving regular and  
54  
55 124 reserve New Zealand Defence Force (NZDF) members registered on the NZDF email system  
56  
57 125 who were 'legal Veterans', as indicated by holding the New Zealand Operational Service  
58  
59 126 Medal. An introductory message and link to the questionnaire were also presented on the  
60  
127 NZDF 'intranet landing page', a secure internal webpage from which all regular force

1  
2 128 personnel can access relevant work-related content, tools, and resources. Retired military  
3  
4 129 personnel were invited to participate through posters distributed to reserve units and the 43  
5  
6 130 local social clubs identified by the RSA national office to be 'Veteran active.' Paper  
7  
8 131 questionnaires with return postage envelopes were made available at these sites.  
9  
10 132 Announcements were also made on military social media pages, and both retired and  
11  
12 133 currently serving personnel were invited to participate through an announcement on the No  
13  
14 134 Duff website. The questionnaire was available for completion from June to December 2018.

### 15 135 **Ethics approval**

16 136 Ethics approval for the study was obtained from the Northern B Health and Disability Ethics  
17  
18 137 Committee, reference 17NTB118.

### 19 138 **Questionnaire**

#### 20 139 *Criterion variable*

21  
22 140 Self-rated health status was assessed using the EQ-5D-5L,[13] a short questionnaire asking  
23  
24 141 about the respondent's health across five dimensions: mobility, self-care, usual activities, pain  
25  
26 142 or discomfort and anxiety or depression, with response options ranging from (e.g.) 'no  
27  
28 143 problems', to 'extreme problems'. For each dimension, participants were categorised as  
29  
30 144 having 'any problems' if they selected any response other than 'no problems'.

31  
32 145 Additionally, the EQ-5D-5L visual analogue scale (EQ-VAS) asks the respondent to mark on a  
33  
34 146 vertical visual analogue scale (VAS) how good or bad their health is today, where the  
35  
36 147 endpoints are labelled 'the best health you can imagine' (score of 100) and 'the worst health  
37  
38 148 you can imagine' (score of 0).

#### 39 149 *Independent variables*

40  
41 150 Demographic characteristics included age, sex, ethnicity, service years, and past deployment  
42  
43 151 on operational service (yes/no). Ethnicity prioritisation was adopted,[14] whereby  
44  
45 152 participants with multiple responses were assigned to one of the categories, in the order of  
46  
47 153 Māori, Pacific Peoples, Other and European.

48  
49 154 Symptoms of PTS were assessed using the post-traumatic stress disorder (PTSD) checklist –  
50  
51 155 military version (PCL-M). The PCL-M includes 17 items that ask about DSM-IV symptoms of  
52  
53 156 PTS related to stressful military experiences, with response options ranging from 1 'Not at all'  
54  
55 157 to 5 'Extremely' (33). A total symptom severity score is calculated by summing responses to  
56  
57 158 each option (range = 17 – 85). While scores of 30-35 indicate significant PTS symptomology  
58  
59 159 and probable cases of PTSD, scores of  $\geq 45$  indicate a presumptive PTSD diagnosis. [15]

1  
2 160 General psychiatric morbidity was assessed using the 12-item General Health Questionnaire  
3  
4 161 (GHQ-12),[16] scored using a four point scale (0-3) and summing the 12 items to give a total  
5  
6 162 score, with higher scores indicating elevated distress.

7 163 Social support was measured using the Social Provisions Scale,[17] with responses made on a  
8  
9 164 four-point Likert-type scale ranging from 1 'strongly disagree' to 4 'strongly agree'. The 24  
10  
11 165 items can be reduced to six subscales (attachment, social integration, reassurance of worth,  
12  
13 166 reliable alliance, social guidance and opportunity for nurturance) or summed to create a total  
14  
15 167 score, with greater scores indicating greater social support.

16 168 Alcohol use was measured using the AUDIT-C,[18] scaled from 0-12. A score of 3+ for women  
17  
18 169 and 4+ for men indicated potentially hazardous drinking behaviour.

19  
20 170 Sleep quality was assessed with the Sleep Condition Indicator (SCI), [19] assessing insomnia as  
21  
22 171 described in the Diagnostic and Statistical Manual of Mental Disorders version 5 (DSM-V).[20]  
23  
24 172 The SCI consists of eight items rated from 0-4, the total scores being scaled to a range of 0 to  
25  
26 173 10, where higher scores represent better sleep.

27 174 Trauma exposure was assessed with the Brief Trauma Scale (BTS),[21] which captures past  
28  
29 175 exposure to situations that were life threatening or capable of producing serious injury.

30  
31 176 Psychological flexibility was measured with the 10-item AAQ-II, designed as a measure of  
32  
33 177 effectiveness in a particular mode of behavioural intervention, Acceptance and Commitment  
34  
35 178 Therapy (ACT).[22] Items were answered on a 7-point scale, with options ranging from 'never  
36  
37 179 true' to 'always true'. The items were summed to obtain a total score (possible range 10 to  
38  
39 180 70), with higher scores indicative of greater psychological flexibility. The questionnaire is  
40  
41 181 available as supplementary material.

## 42 182 **Statistical analyses**

43  
44 183 With respect to the calculation of summed scores, if only one item was missing for a particular  
45  
46 184 measure then this was imputed with the mean of the remaining items; if more than one item  
47  
48 185 was missing then the score was set to missing for that participant. Complete case analysis was  
49  
50 186 used in the remaining analyses. Z tests were used to compare the five dimensions of the EQ-  
51  
52 187 5D-5L to the NZ population normative values.[23]

53 188 Univariate ordinary least-squares linear regression analyses assessed the strength of  
54  
55 189 relationships between each independent variable and EQ-VAS scores, using robust standard  
56  
57 190 errors to account for heteroscedasticity and calculating 95% confidence intervals (95% CIs).  
58  
59 191 Multivariable linear regression was then used to identify the role of the independent variables  
60  
192 while adjusting for each other. None of the social support sub-scales were used in this

1  
2 193 multivariable model, instead using the social support total score. The model was built using  
3  
4 194 backward variable selection with  $p < 0.10$  for variable retention, with the exceptions of age,  
5  
6 195 sex, service years, and deployment status which were retained as adjusting variables  
7  
8 196 irrespective of p-values. Cronbach's  $\alpha$ , ( $C_\alpha$ ) reported in Table 2, was used to assess the  
9  
10 197 internal consistency of the scales used.[24] A value of alpha greater than 0.7 is considered  
11  
12 198 adequate.[25] Collinearity was assessed by calculating the Pearson correlation coefficient ( $r$ );  
13  
14 199 if  $0 < r < 1$  there is a positive linear trend.

## 200 RESULTS

201 The EQ-5D was completed by 1767 Veterans, 1009 who were serving (26% of that group), 458  
202 who had retired, 288 who had not deployed, and 21 who did not provide deployment data.

203 There are no reliable denominator data on retired and non-deployed Veterans in New  
204 Zealand.

205 To facilitate a complete case analysis, 247 replies were not used due to missing values in one  
206 or more variables, the final sample including 1520 individuals.

207 A supplementary table presents the EQ-VAS score according to the sample characteristics.

208 Figure 1 shows the proportion of EQ-5D-5L dimension responses reporting 'any problem'  
209 severity level other than 'no problems' in comparison to the New Zealand population  
210 normative values,[23] with Table 1 showing the 95% CI's and Z values.

### 211 Figure 1 about here

212 Table 1, Proportion of 'any problem' in EQ-5D domains

| Domain             | Veterans            | NZ population       | Z value (p)  |
|--------------------|---------------------|---------------------|--------------|
|                    | Proportion (95% CI) | Proportion (95% CI) |              |
| Mobility           | 0.40 (0.38-0.43)    | 0.28 (0.26-0.30)    | 8.5 (<.0001) |
| Self-care          | 0.11 (0.10-0.13)    | 0.09 (0.07-0.10)    | 2.8 (0.03)   |
| Usual activities   | 0.38 (0.35-0.40)    | 0.30 (0.28-0.31)    | 5.6 (<.001)  |
| Pain/discomfort    | 0.75 (0.73-0.77)    | 0.62 (0.60-0.63)    | 9.0 (<.0001) |
| Anxiety/depression | 0.47 (0.44-0.49)    | 0.46 (0.44-0.48)    | 0 (1.0)      |

213

214 The results of the univariate analysis are displayed in Table 2. Here, for continuous  
215 characteristics, the regression coefficient ( $\beta$ ) represents the change in the mean EQ-VAS  
216 associated with one unit increase in the characteristic. For categorical characteristics,  $\beta$  is the  
217 change in mean EQ-VAS scores compared to the referent category.

218 **Table 2: Univariate cross-sectional associations between variables and mean EQ-VAS scores**  
 219 **for New Zealand Veterans (N=1,520)**

| Characteristic               | $C_{\alpha}$ | $n$  | $\beta$ | 95%<br>CIs     | $p$ -value |
|------------------------------|--------------|------|---------|----------------|------------|
| Age*                         | -            | 1520 | -0.18   | [-0.24, -0.12] | <0.01      |
| Sex                          |              |      |         |                |            |
| Female                       | -            | 189  | Ref     |                |            |
| Male                         | -            | 1331 | -0.15   | [-2.76, 2.46]  | 0.91       |
| Ethnicity                    | -            |      |         |                |            |
| NZ European                  | -            | 1193 | Ref     |                | 0.13       |
| Māori                        | -            | 214  | 0.82    | [-1.56, 3.19]  |            |
| Other                        | -            | 113  | -3.55   | [-7.33, 0.23]  |            |
| Service years*               | -            | 1520 | 0.19    | [0.11, 0.28]   | <0.01      |
| Deployment status            | -            |      |         |                |            |
| Not deployed                 | -            | 242  | ref     |                |            |
| Deployed                     | -            | 1278 | 6.56    | [3.85, 9.26]   | <0.01      |
| GHQ-12 score*                | 0.89         | 1520 | -1.63   | [-1.81, -1.46] | <0.01      |
| Social support*              |              | 1520 | 2.05    | [1.70, 2.41]   | <0.01      |
| Attachment                   | 0.81         | 1520 | 2.47    | [2.02, 2.92]   | <0.01      |
| Social integration           | 0.79         | 1520 | 2.49    | [2.08, 2.91]   | <0.01      |
| Reassurance of worth         | 0.77         | 1520 | 2.39    | [1.97, 2.82]   | <0.01      |
| Reliable alliance            | 0.81         | 1520 | 2.01    | [1.63, 2.39]   | <0.01      |
| Social guidance              | 0.84         | 1520 | 0.83    | [0.40, 1.25]   | <0.01      |
| Opportunity for nurturance   | 0.75         | 1520 | 0.53    | [0.44, 0.61]   | <0.01      |
| Social support total score   | -            | 1520 | 0.80    | [0.71, 0.88]   | <0.01      |
| Psychological flexibility*   | 0.93         | 1520 | 3.56    | [3.18, 3.95]   | <0.01      |
| Sleep score*                 | 0.87         |      |         |                | <0.01      |
| AUDIT-C                      | 0.67         | 707  | Ref     |                |            |
| Non-hazardous                |              | 813  | 0.71    | [-1.04, 2.45]  | 0.43       |
| Hazardous                    |              |      |         |                |            |
| Exposure to traumatic events | -            |      |         |                |            |
| Not exposed                  |              | 454  | Ref     |                |            |
| Exposed                      |              | 1066 | -5.62   | [-7.39, 3.86]  | <0.01      |
| PTSD (PCL-M Score)*          |              | 1520 | -0.67   | [-0.75, -0.60] | <0.01      |

\*Scored as continuous variables, coefficient is per unit increase

220  
 221  
 222 Of the demographic variables, age was associated with lower EQ-VAS scores, length of service  
 223 with higher scores. No relationships were apparent for sex or ethnicity. Positive coefficients,  
 224 indicating better health with presence of the characteristic, were present for dichotomous  
 225 variables of deployment, where the mean EQ-VAS score for deployed Veterans was 6.56 VAS  
 226 units higher (better) than for non-deployed. The largest negative associations were for  
 227 exposure to traumatic events, with a mean EQ-VAS score 5.62 lower for those exposed  
 228 compared to those not exposed. Distress, as measured by the GHQ-12, had a negative  
 229 association with health state, as did PTSD as measured by the PCL-M. Positive associations

1  
2 230 with health state were found for psychological flexibility as measured by the AAQ-II, better  
3  
4 231 sleep scores, the total support scores and the individual dimensions.  
5  
6 232 Table 3 shows the results from two multivariable models. The first model is adjusted for the  
7  
8 233 other characteristics, with 12 variables included in the model. All effect sizes were reduced,  
9  
10 234 and the social support and AUDIT-C scores were no longer associated.  
11  
12 235 The final model involved backward variable selection setting a p-value of 0.10, identifying a  
13  
14 236 smaller subset of variables. Age, sex, service years, and deployment status were retained in  
15  
16 237 the model irrespective of their p-values, thus adjusting for those variables. Social support  
17  
18 238 and AUDIT-C hazardous drinking were not retained in this final model; other coefficients  
19  
20 239 remaining essentially the same.  
21  
22  
23  
24  
25  
26  
27  
28  
29  
30  
31  
32  
33  
34  
35  
36  
37  
38  
39  
40  
41  
42  
43  
44  
45  
46  
47  
48  
49  
50  
51  
52  
53  
54  
55  
56  
57  
58  
59  
60

**Table 3. Multivariable models of associations between variables and mean EQ-VAS scores for New Zealand Veterans**

| Characteristic                           | Adjusted model, N =1,520 |                |         | Final model, N =1,520 |                |         |
|------------------------------------------|--------------------------|----------------|---------|-----------------------|----------------|---------|
|                                          | $\beta$                  | 95% CI         | p-value | $\beta$               | 95% CI         | p-value |
| Age (years)*                             | -0.15                    | [-0.21, -0.10] | <0.01   | -0.16                 | [-0.22, -0.10] | <0.01   |
| Sex                                      |                          |                |         |                       |                |         |
| Female                                   | Ref                      |                |         | Ref                   |                |         |
| Male                                     | 0.06                     | [-0.23, 2.35]  | 0.96    | 0.02                  | [-2.27, 2.30]  | 0.99    |
| Ethnicity                                |                          |                |         |                       |                |         |
| NZ European                              | Ref                      |                | 0.03    | Ref                   |                | 0.03    |
| Māori                                    | 0.53                     | [-1.46, 2.53]  |         | 0.55                  | [-1.44, 2.54]  |         |
| Other                                    | -4.04                    | [-7.12, -0.95] |         | -4.07                 | [-7.16, -0.99] |         |
| Service years*                           | 0.16                     | [0.09, 0.24]   | <0.01   | 0.17                  | [0.09, 0.24]   | <0.01   |
| Deployment status                        |                          |                |         |                       |                |         |
| Not deployed                             | Ref                      |                |         | Ref                   |                |         |
| Deployed                                 | 3.33                     | [1.00, 5.67]   | 0.01    | 3.36                  | [1.03, 5.70]   | 0.01    |
| GHQ12 score*                             | -0.83                    | [-1.06, -0.61] | <0.01   | -0.84                 | [-1.06, -0.62] | <0.01   |
| Social support (SPS score)*              | 0.02                     | [-0.07, 0.11]  | 0.65    | -                     | - -            | -       |
| Psychological flexibility score (AAQii)* | 0.18                     | [0.06, 0.31]   | 0.01    | 0.19                  | [0.07, 0.31]   | <0.01   |
| Sleep score (SCI), Range 0-10*           | 1.41                     | [0.95, 1.88]   | <0.01   | 1.41                  | [0.95, 1.87]   | <0.01   |



244 Table 3, continued

|                                    |       |                |      |       |                |      |   |
|------------------------------------|-------|----------------|------|-------|----------------|------|---|
| AUDIT_C score                      |       |                |      |       |                |      |   |
| Non hazardous                      | Ref   |                |      |       |                |      |   |
| Hazardous                          | 0.37  | [-1.05, 1.79]  | 0.61 | -     | -              | -    | - |
| Exposure to traumatic events (BTQ) |       |                |      |       |                |      |   |
| Not exposed                        | Ref   |                |      | Ref   |                |      |   |
| Exposed                            | -1.46 | [-3.02, 0.11]  | 0.07 | -1.45 | [-3.02, 0.12]  | 0.07 |   |
| PTSD (PCL-M Score)*                |       |                |      |       |                |      |   |
|                                    | -0.14 | [-0.25, -0.04] | 0.01 | -0.15 | [-0.25, -0.04] | 0.01 |   |

\*Scored as continuous variables, coefficient is per unit increase.

## 246 **DISCUSSION**

### 247 *Principal findings*

248 With the exception of anxiety or depression, Veterans had a significantly greater proportion  
249 of 'any problem' responses in the EQ-5D dimensions than the general population of New  
250 Zealand.

251 The final model identified variables independently associated with the EQ-VAS score: age,  
252 length of service, deployment, the GHQ score, psychological flexibility, the sleep score and  
253 exposure to traumatic events. The results make conceptual sense in that distress is associated  
254 with reduced EQ-VAS, and psychological flexibility may have a modest protective effect. Age  
255 had a negative association, length of service being positive, most likely due to the 'healthy  
256 soldier' effect.[1] Unusually, Social Support was dropped, however the SPS was found to  
257 correlate significantly with GHQ12 ( $r=0.47$ ), AAQii ( $r=0.56$ ), and SCI scores ( $r=0.36$ ), suggesting  
258 collinearity. There are known to be many other influences on health, including 'social  
259 wellbeing',[5] financial status, personality and non-deployment related stressors,[26] which  
260 we have not measured.

### 261 *Strengths and weaknesses*

262 Strengths of our study were the relatively large sample size, the inclusion of all Veterans, the  
263 assessment of 'health', infrequently investigated in Veteran populations, and the inclusion of  
264 New Zealand Veterans with a range of characteristics, including 'deployed' and 'non-  
265 deployed' Veterans. As a measure of health, the EQ-5D-5L dimensions and EQ-VAS ask about  
266 health on the day that respondents complete the questionnaire, the EQ-VAS end points being,  
267 respectively, the 'best' and 'worst' health they can imagine, so it is a holistic measure of health  
268 state.[27]

269 The response rate of 26% from serving Veterans, along with the unknown total number of  
270 Veterans, raises the question of bias, the direction of which is difficult to assess, as  
271 responses may be more likely from either Veterans with good or poor health. The healthy  
272 soldier effect is well known, service having a positive effect on wellbeing, with serving NZ  
273 Veterans having good access to primary health care through the military system, but the  
274 public health care system is the primary pathway to care for all Veterans, who are also  
275 covered by the 'no fault' accident compensation scheme for accidental injuries and  
276 occupational diseases.[28] Deployed Veterans may be at an advantage, but are covered by  
277 NZVA only if their illness or injury is linked to a particular deployment, and the condition is  
278 listed on the 'Statements of Principle' of the Australian Repatriation Medical Authority.[29]

1  
2 279 We also know that New Veterans tend to be stoic, so they might underestimate their health  
3  
4 280 concerns,[30] and there are likely to be other personal characteristics that we have not  
5  
6 281 measured. We were however able to adjust for deployment status, which did have a positive  
7  
8 282 association with health state. In the interest of minimising responder burden, we used brief  
9  
10 283 scales, which might reduce construct validity. Distress, sleep, psychological flexibility and  
11  
12 284 exposure to traumatic events are likely to be related, so collinearity was difficult to avoid.  
13  
14 285 The confounding effect was greatest for social support, but our finding does not mean that  
15  
16 286 social support is of no importance to Veterans. The precision of the other coefficients may  
17  
18 287 also have been affected. Finally, the cross-sectional design means that we cannot explore  
19  
20 288 cause and effect, so recommendations for future interventions require additional support  
21  
22 289 from longitudinal studies.

### 22 290 *Comparison with other studies*

23  
24 291 We have previously reported factors associated with post-traumatic stress in this group,[31]  
25  
26 292 using the Military Post Traumatic Stress Checklist (PCL-M). Factors associated with higher PCL-  
27  
28 293 M scores were trauma exposure, older age, male gender, and being of Māori ethnicity. Factors  
29  
30 294 associated with lower PCL-M scores were greater length of service, psychological flexibility,  
31  
32 295 and better quality sleep. Using health as the outcome disclosed that Māori did not have poorer  
33  
34 296 self-reported health compared to non-Māori, that deployment had a positive effect, and in  
35  
36 297 the univariate models, all of the dimensions of social support were associated with improved  
37  
38 298 health. The final model also included good sleep and psychological flexibility, providing most  
39  
40 299 of the explanatory power in the model.

41 300 No other studies appear to have used the EQ-VAS as an outcome measure for Veteran health.  
42  
43 301 Boehmer et al.[32] examined wellbeing among participants in the 2000 Behavioural Risk  
44  
45 302 Factor Surveillance System describing health-related quality of life (HRQoL) by sex and military  
46  
47 303 status, active duty, reservists Veterans, or no military service. Participants were asked to rate  
48  
49 304 recent physical health, mental health, and activity limitation. Active duty men were more likely  
50  
51 305 than men without military service to report 14 or more days of activity limitation, pain, and  
52  
53 306 not enough rest in the past 30 days, the mobility and pain findings being similar to our sample.  
54  
55 307 Notably, the predominant reason for medical discharge from the British Armed Forces was  
56  
57 308 musculoskeletal problems.[33]

57 309 Contrary to our finding on deployment, there are reports indicating that non-deployed  
58  
59 310 personnel retain better health than those who have been deployed. Diaz Santana et al.[34]  
60  
311 having carried out a cross-sectional survey of 60,000 U.S. Veterans of Afghanistan and Iraq,

1  
2 312 with 20,563 responses. In contrast to our finding, mental quality of life scores were higher  
3  
4 313 among the non-deployed group compared to the deployed group, though the deployed group  
5  
6 314 reported higher physical quality of life scores compared to the non-deployed. Again in  
7  
8 315 contrast, both mental and physical quality of life were lower among Veterans compared to  
9  
10 316 U.S. population norms.

11 317 Both positive and negative consequences of deployment have been described.[7,35] In a study  
12  
13 318 of Dutch Veterans,[7] two out of three reported a positive effect of deployment on their  
14  
15 319 quality of life at the time of the survey, this being related to positive feelings such as  
16  
17 320 satisfaction or comradeship, but a few having emotions such as frustration or shame. As  
18  
19 321 regards tangible effects,[35] negative consequences included the military 'chain of command',  
20  
21 322 being away from home, and deterioration of marital/significant other relationships. Positive  
22  
23 323 influences include improved financial security, self-improvement, and time to reflect.

24 324 We found sleep to be associated with better health, but sleep difficulties are a common  
25  
26 325 symptom for those with PTSD. McCarthy et al.[36] reported on the 3,157 U.S. military  
27  
28 326 Veterans enrolled in the National Health and Resilience in Veterans Study, in which 27.6%  
29  
30 327 reported poor sleep quality. Path analyses revealed significant associations between poor  
31  
32 328 sleep, severity of PTSD, poorer mental and physical health functioning and lower overall  
33  
34 329 quality of life.

### 35 330 *Future directions*

36  
37 331 The results suggest that distress, psychological flexibility, and sleep have an important  
38  
39 332 relationship with self-rated health among Veterans in this study.

40  
41 333 Reducing distress through the promotion of psychological flexibility might be possible,  
42  
43 334 although our finding here must be subject to caution as several researchers argue that the  
44  
45 335 AAQ-II may be measuring psychological distress and affect rather than psychological  
46  
47 336 inflexibility.[37]

48 337 Sleep in military personnel has been recognised as a 'vital health behaviour' for which policies  
49  
50 338 and guidelines must be developed.[38] Cognitive behavioural therapy for insomnia (CBT-I) is  
51  
52 339 regarded as an effective 'first line' treatment, and a brief intervention has been described for  
53  
54 340 use in Australian general practice.[39]. Our final model showed that distress had a negative  
55  
56 341 association with health, and psychological flexibility had a positive relationship, with sleep  
57  
58 342 most likely related to both of these variables. It would seem important to screen for these  
59  
60 343 conditions prior to transition from the military, as well as among retired Veterans, in order to

1  
2 344 provide targeted support. Further research is needed to examine the potential of cognitive  
3  
4 345 behavioural therapy to improve Veterans' wellbeing.  
5  
6 346

7  
8 347 **REFERENCES**  
9

- 10 348 1. McLaughlin R, Nielsen L, Waller M. An Evaluation of the Effect of Military Service on  
11 349 Mortality: Quantifying the Healthy Soldier Effect. *Ann Epidemiol*. 2008;18(2):928-936.  
12 350 2. Bollinger MJ, Schmidt S, Pugh JA et al. Erosion of the healthy soldier effect in Veterans  
13 351 of US military service in Iraq and Afghanistan. *Popul Health Metr*. 2015;13:8.  
14 352 3. Kimberley A, Andersen KA, Grimshaw PN et al. Musculoskeletal Lower Limb Injury Risk  
15 353 in Army Populations. *Sports Med-Open* 2016;2:22. DOI 10.1186/s40798-016-0046-z.  
16 354 4. Hoge CW, Castro CA, Messer SC et al. Combat duty in Iraq and Afghanistan, mental  
17 355 health problems, and barriers to care. *N Engl J Med*. 2004;351(1):13–22.  
18 356 5. Oster C, Morello A, Venning A et al. The health and wellbeing needs of Veterans: a  
19 357 rapid review. *BMC Psychiatry*. 2017;17(1):414.  
20 358 6. Spiro A, 3rd, Settersten RA, Aldwin CM. Long-term Outcomes of Military Service in  
21 359 Aging and the Life Course: A Positive Re-envisioning. *Gerontologist*. 2016;56(1):5-13.  
22 360 7. Duel J and Reijnen A. The long term effects of military deployment and their relation  
23 361 with the quality of life of Dutch Veterans. *Mil Behav Heal*. 2021;9(2):160-169.  
24 362 8. Pedlar D, Thompson JM, Castro CA. Military Veteran reintegration. Military-to-civilian  
25 363 transition theories and frameworks. In: Castro C, Dursun S, editors. *Military Veteran*  
26 364 *reintegration, approach, management, and assessment of military Veterans*  
27 365 *transitioning to civilian life*. San Diego: Academic Press; 2019. 257p.  
28 366 9. Veterans Support Act (NZ) 2014. [cited 2020 28 August] Available:  
29 367 <https://www.legislation.govt.nz/act/public/2014/0056/latest/whole.html>.  
30 368 10. New Zealand Government. Briefing to the Incoming Minister for Veterans. Wellington:  
31 369 New Zealand Veteran's Affairs; 2020. [cited 2020 28 August] Available from:  
32 370 <https://www.beehive.govt.nz/sites/default/files/2020-12/Veteran%20Affairs.pdf>.  
33 371 11. Royal New Zealand Returned and Services Association [internet]. [cited 2022 2  
34 372 February] Available: <https://www.rsa.org.nz/>.  
35 373 12. NoDuff. [Internet]. [cited 2022 2 February] <https://www.noduff.org/>.  
36 374 13. EuroQol Research Foundation. EQ-5D-5L User Guide [Internet]. Rotterdam: EuroQol  
37 375 Research Foundation; 2021. [cited 2022 2 February]. Available from:  
38 376 <https://euroqol.org/eq-5d-instruments/eq-5d-5l-about/>.

- 1  
2 377 14. Health Information Standards Organisation. Ethnicity data protocols. Wellington:  
3  
4 378 Ministry of Health; 2017. Standard No.: HISO 10001:2017.
- 5  
6 379 15. U.S. Department of Veterans Affairs. Using the PTSD Checklist (PCL). Veterans Affairs  
7  
8 380 National Center for PTSD; 2012.
- 9  
10 381 16. Goldberg D.P. The Detection of Psychiatric Illness by Questionnaire. Maudsley  
11  
12 382 Monograph No. 21. London: Oxford University Press; 1972.
- 13  
14 383 17. Barrera, M., Jr. and Ainlay, S.L. The structure of social support: a conceptual and  
15  
16 384 empirical analysis. *J Comm Psychol*. 1983;11(2):133-43.
- 17  
18 385 18. Bush K, Kivlahan DR, McDonell MB et al. The AUDIT alcohol consumption questions  
19  
20 386 (AUDIT-C): an effective brief screening test for problem drinking. Ambulatory Care  
21  
22 387 Quality Improvement Project (ACQUIP). Alcohol Use Disorders Identification Test. *Arch*  
23  
24 388 *Intern Med*. 1998;158(16):1789-95.
- 25  
26 389 19. Espie CA, Kyle SD, Hames P, Gardani M et al. The Sleep Condition Indicator: a clinical  
27  
28 390 screening tool to evaluate insomnia disorder. *BMJ Open*. 2014;4(3): e004183.
- 29  
30 391 20. American Psychiatric Association. Diagnostic and Statistical Manual of Mental  
31  
32 392 Disorders (DSM-5). Fifth edition. Washington DC: American Psychiatric Association  
33  
34 393 2013. 991p.
- 35  
36 394 21. Schnurr PP, Spiro A, Vielhauer MJ, et al. Trauma in the Lives of Older Men: Findings  
37  
38 395 from the Normative Aging Study. *Journal of Clinical Geropsychology*. 2002;8(3):175-  
39  
40 396 87.
- 41  
42 397 22. Bond FW, Hayes SC, Baer RA et al. Preliminary psychometric properties of the  
43  
44 398 Acceptance and Action Questionnaire-II: a revised measure of psychological  
45  
46 399 inflexibility and experiential avoidance. *Behav Therapy*. 2011;42(4): 676-688.
- 47  
48 400 23. Sullivan T, Hansen P, Ombler F, et al. (2020) A new tool for creating personal and social  
49  
50 401 EQ-5D-5L value sets, including valuing 'dead'. *Soc Sci Med*. 2020; 246:112707.
- 51  
52 402 24. Cronbach L. Coefficient alpha and the internal structure of tests. *Psychometrika*.  
53  
54 403 1951;16:297-334.
- 55  
56 404 25. Bland J M, Altman D G. Statistics notes: Cronbach's  
57  
58 405 alpha. *BMJ*. 1997;314:572 doi:10.1136/bmj.314.7080.572
- 59  
60 406 26. Brooks SK, Greenberg N. Non-deployment factors affecting psychological wellbeing in  
407  
408 407 military personnel: literature review. *J Ment Health*. 2018;27(1):80-90.
- 409  
410 408 27. Feng Y, Parkin D, Devlin NJ. Assessing the performance of the EQ-VAS in the NHS  
411  
412 409 PROMs programme. *Qual Life Res*. 2014;23(3):977-89.

- 1  
2 410 28. Accident Compensation Corporation. Homepage [Internet] Wellington: Accident  
3 Compensation Corporation 2022 [cited 2022 Feb 16] Available from:  
4 411  
5 https://www.acc.co.nz/.  
6 412
- 7 413 29. Repatriation Medical Authority. Statements of Principle [Internet]. Canberra ACT:  
8 Repatriation Medical Authority 2022 [cited 2022 Feb 16] Available from:  
9 414  
10 http://www.rma.gov.au/sops/.  
11 415
- 12 416 30. Austin G, Calvert Toby, Fasi N, et al. Soldiering on only goes so far: How a qualitative  
13 study on Veteran loneliness in New Zealand influenced that support during COVID-19  
14 lockdown. *Journal of Military, Veteran and Family Health*. 2020;6(S2):60-69.  
15 417  
16 418
- 17 419 31. Richardson A, Gurung G, Samaranayaka A, et al. Risk and protective factors for post-  
18 traumatic stress among New Zealand military personnel: A cross sectional study. *PLoS*  
19 *One*. 2020;15(4):e0231460.  
20 420  
21 421
- 22 422 32. Boehmer TK, Boothe VL, Flanders WD et al. Health-related quality of life of U.S. military  
23 personnel: a population-based study. *Mil Med*. 2003;168(11):941-7.  
24 423
- 25 424 33. Williamson V, Diehle J, Dunn R, et al. The impact of military service on health and well-  
26 being. *Occup Med (Lond)*. 2019;69(1):64-70.  
27 425
- 28 426 34. Diaz Santana MV, Eber S, Barth S, Cypel Y et al. Health-Related Quality of Life Among  
29 U.S. Veterans of Operation Enduring Freedom and Operation Iraqi Freedom-Results  
30 From a Population-Based Study. *Mil Med*. 2017;182(11):e1885-e91.  
31 427  
32 428
- 33 429 35. Newby JH, McCarroll JE, Ursano RJ, et al. Positive and negative consequences of a  
34 military deployment. *Mil Med*. 2005;170(10):815-9.  
35 430
- 36 431 36. McCarthy E, DeViva JC, Norman SB, et al. Self-assessed sleep quality partially mediates  
37 the relationship between PTSD symptoms and functioning and quality of life in U.S.  
38 Veterans: Results from the National Health and Resilience in Veterans Study. *Psychol*  
39 *Trauma*. 2019;11(8):869-76.  
40 432  
41 433
- 42 434 37. Wolgast M. What does the Acceptance and Action Questionnaire (AAQ-II) really  
43 measure? *Behav Ther*. 2014;45(6):831-839.  
44 435
- 45 436 38. Troxel WM et al. Sleep in the Military: Promoting Healthy Sleep Among U.S.  
46 Servicemembers. RAND Corporation, 2015[cited 2021 August 28]. Available from:  
47 https://www.rand.org/content/dam/rand/pubs/research\_reports/RR700/RR739/RA  
48 ND\_RR739.pdf.  
49 437  
50 438
- 51 439 39. Sweetman A et al. A step-by-step model for a brief behavioural treatment for  
52 insomnia in Australian general practice. *Aust J Gen Pract*. 2021;50(5):287–293.  
53 440  
54 441  
55 442

1  
2 444 **DATA SHARING STATEMENT**  
3

4 445 Data from this study is unsuitable for public deposition due to the privacy of participant data.  
5  
6 446 Data are anonymised, but contain information on deployments (including location and  
7  
8 447 duration), which could lead to some participants being identified. Furthermore, the  
9  
10 448 participant information sheet, as required by the Southern Health and Disability Ethics  
11  
12 449 Committee specifically contains the statement that 'all study data would be kept strictly  
13  
14 450 confidential to the research team.' Qualified researchers may apply for data access with the  
15  
16 451 research team at veterans.health@otago.ac.nz and/or hdecs@moh.govt.nz.

17 452 **FUNDING**

18  
19 453 This work was supported by a research grant from the Ministerial Veterans Health Advisory  
20  
21 454 Panel, funded through the War Pensions Medical Research Trust Fund (grant number not  
22  
23 455 applicable), also by Lottery Health (grant number LHR-2017-49146) and the Royal New  
24  
25 456 Zealand Returned and Services Association (grant number not applicable).

26  
27 457 **COMPETING INTERESTS**

28  
29 458 None declared.

30  
31 459 **CONTRIBUTION**

32  
33 460 All the authors have made substantial contributions to the conception or design of the work;  
34  
35 461 or the acquisition, analysis, or interpretation of data for the work; AND  
36  
37 462 Drafting the work or revising it critically for important intellectual content; AND  
38  
39 463 Final approval of the version to be published; AND  
40  
41 464 Agreement to be accountable for all aspects of the work in ensuring that questions related to  
42  
43 465 the accuracy or integrity of any part of the work are appropriately investigated and resolved.

44  
45 466 **Specific responsibilities**

46  
47 467 **Investigation:** Amy Richardson, Emma H. Wyeth, Sarah Derrett, Daniel Shepherd, David  
48  
49 468 McBride.

50  
51 469 **Methodology:** Amy Richardson, Ari Samaranayaka, Dianne Gardner, Emma H. Wyeth, Sarah  
52  
53 470 Derrett, David McBride, Daniel Shepherd.

54  
55 471 **Project administration:** Amy Richardson.

56  
57 472 **Resources:** Brandon de Graaf.

58  
59 473 **Software:** Brandon de Graaf.

60 474 **Supervision:** Ari Samaranayaka.



1  
2 475 **Validation:** Amy Richardson.  
3

4 476 **Visualization:** Amy Richardson.

5 477 **Writing – original draft:** David McBride. AS, DG, EHW, SD and DS contributed to the re-writes  
6  
7 478 and final draft.  
8  
9

## 10 479 **ACKNOWLEDGEMENTS**

11  
12 480 We would like to thank Shane Harvey for his input into the initial design, Aidan Smith, previous  
13  
14 481 research advisor to the NZDF, for steering us through the consents process, also the members  
15  
16 482 of our steering group: COL Clare Bennett (NZDF); Ms Marti Eller (New Zealand Veterans  
17  
18 483 Affairs); Mark Compain, Danny Nelson and Richard Terrill (RSA); and NoDuff representatives  
19  
20 484 Aaron Wood and Lars Millar.

21 485 Finally, a thank you to the New Zealand Veterans who took the time and effort to complete a  
22  
23 486 rather tedious questionnaire. Kia Kaha.

24  
25 487 Figure 1 Caption.

26 488 **The proportion of Veterans reporting ‘any problem’ with each of the EQ-5D-5L dimension**  
27  
28 489 **scores compared to the NZ population normative proportions**

29  
30 490

31  
32 491

33  
34 492  
35  
36  
37  
38  
39  
40  
41  
42  
43  
44  
45  
46  
47  
48  
49  
50  
51  
52  
53  
54  
55  
56  
57  
58  
59  
60

1  
2  
3  
4  
5  
6  
7  
8  
9  
10  
11  
12  
13  
14  
15  
16  
17  
18  
19  
20  
21  
22  
23  
24  
25  
26  
27  
28  
29  
30  
31  
32  
33  
34  
35  
36  
37  
38  
39  
40  
41  
42  
43  
44  
45  
46  
47  
48  
49  
50  
51  
52  
53  
54  
55  
56  
57  
58  
59  
60

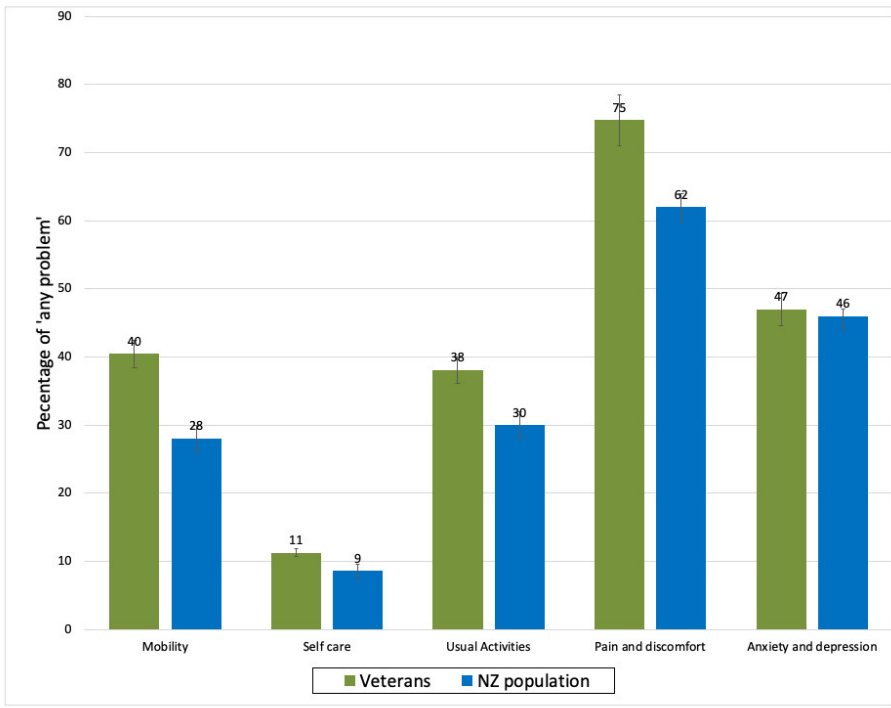

The proportion of Veterans reporting 'any problem' with each of the EQ-5D-5L dimension scores compared to the NZ population normative proportions

86x65mm (300 x 300 DPI)

**Supplementary Table: Number of participants and EQ-VAS scores according to sample characteristics**

| <b>Exposure variable</b>       | <b>N (%)</b> | <b>Mean (SD)</b> |
|--------------------------------|--------------|------------------|
| <b>All</b>                     | 1767         | 74.4 (17.1)      |
| <b>Age group (years)</b>       |              |                  |
| 20-29                          | 136 (7.7)    | 77.7 (14.4)      |
| 30-39                          | 328 (18.6)   | 77.0 (16.2)      |
| 40-49                          | 438 (24.8)   | 76.1 (14.6)      |
| 50-59                          | 350 (19.8)   | 74.8 (16.6)      |
| 60-69                          | 285 (16.1)   | 71.4 (19.8)      |
| 70-79                          | 175 (9.9)    | 69.4 (19.4)      |
| 80+                            | 50 (2.8)     | 66.2 (20.3)      |
| Missing                        | 5 (0.3)      | 61.2 (22.1)      |
| <b>Gender</b>                  |              |                  |
| Female                         | 220 (12.5)   | 75.0 (16.9)      |
| Male                           | 1520 (86.0)  | 74.4 (17.2)      |
| Missing                        | 27 (1.5)     | 70.3 (17.2)      |
| <b>Ethnicity (prioritised)</b> |              |                  |
| NZ European                    | 1382 (78.2)  | 74.4 (17.1)      |
| Māori                          | 245 (13.9)   | 75.6 (16.1)      |
| Other                          | 140 (7.9)    | 71.5 (19.3)      |
| <b>Service years</b>           |              |                  |
| 0-9                            | 339 (19.2)   | 69.9 (19.7)      |
| 10-19                          | 478 (27.1)   | 74.5 (17.9)      |
| 20-29                          | 530 (30.0)   | 75.3 (15.9)      |
| 30-39                          | 254 (14.4)   | 76.3 (14.6)      |
| 40+                            | 69 (3.9)     | 75.4 (16.4)      |
| Missing                        | 97 (5.5)     | 78.8 (14.2)      |
| <b>Deployment (ever)</b>       |              |                  |
| No                             | 288 (16.3)   | 69.5 (19.9)      |
| Yes                            | 1458 (82.5)  | 75.3 (16.4)      |
| Missing                        | 21 (1.2)     | 75.6 (14.6)      |
| <b>GHQ12 Score</b>             |              |                  |
| 0-9                            | 652 (36.9)   | 82.0 (12.6)      |
| 10-19                          | 972 (55.0)   | 72.3 (16.0)      |
| 20-29                          | 123 (7.0)    | 54.3 (20.3)      |
| 30+                            | 18 (1.0)     | 46.2 (24.4)      |
| Missing                        | 2 (0.1)      | -                |

\*sub-scores not used in multivariable models.

## Supplementary table contd.

| <b>Social support full score</b>   |      |                    |
|------------------------------------|------|--------------------|
| 24-29                              | 0    | 0 -                |
| 30-39                              | 3    | (0.2) 66.7 (15.3)  |
| 40-49                              | 15   | (0.8) 44.5 (22.5)  |
| 50-59                              | 97   | (5.5) 62.4 (21.8)  |
| 60-69                              | 351  | (19.9) 69.0 (18.2) |
| 70-79                              | 643  | (36.4) 75.1 (15.0) |
| 80-89                              | 409  | (23.1) 78.0 (15.0) |
| 90-96                              | 235  | (13.3) 81.9 (13.9) |
| Missing                            | 14   | (0.8) 58.1 (25.6)  |
| <b>Social support sub-scores</b>   |      |                    |
| <b>Attachment*</b>                 |      |                    |
| 4-7                                | 51   | (3.5) 61.4 (23.4)  |
| 8-11                               | 516  | (29.2) 68.7 (18.0) |
| 12-16                              | 1193 | (67.5) 77.5 (15.5) |
| Missing                            | 7    | (0.4) 61.0 (19.7)  |
| <b>Social integration*</b>         |      |                    |
| 4-7                                | 20   | (1.1) 56.2 (25.1)  |
| 8-11                               | 429  | (24.3) 67.1 (19.4) |
| 12-16                              | 1309 | (74.8) 77.1 (15.2) |
| Missing                            | 9    | (0.5) 58.7 (21.5)  |
| <b>Reassurance of worth*</b>       |      |                    |
| 4-7                                | 37   | (2.1) 59.1 (19.5)  |
| 8-11                               | 504  | (28.5) 69.0 (19.1) |
| 12-16                              | 1215 | (68.8) 77.2 (15.2) |
| Missing                            | 11   | (0.6) 62.0 (24.9)  |
| <b>Reliable Alliance*</b>          |      |                    |
| 4-7                                | 20   | (1.1) 49.6 (22.2)  |
| 8-11                               | 251  | (14.2) 66.9 (20.1) |
| 12-16                              | 1489 | (84.3) 76.0 (15.9) |
| Missing                            | 7    | (0.4) 61.0 (19.7)  |
| <b>Guidance sub-score*</b>         |      |                    |
| 4-7                                | 36   | (2.0) 59.2 (22.2)  |
| 8-11                               | 387  | (21.9) 68.7 (18.9) |
| 12-16                              | 1337 | (75.7) 76.6 (15.7) |
| Missing                            | 7    | (0.4) 54.6 (21.6)  |
| <b>Opportunity for nurturance*</b> |      |                    |
| 4-7                                | 29   | (1.6) 69.3 (18.9)  |
| 8-11                               | 413  | (23.4) 71.9 (18.8) |
| 12-16                              | 1316 | (74.5) 75.4 (16.4) |
| Missing                            | 9    | (0.5) 58.7 (21.5)  |

## Supplementary table, contd.

**Psychological flexibility score  
(AAQii score).**

|         |     |        |             |
|---------|-----|--------|-------------|
| 10-19   | 5   | (0.3)  | 23.2 (13.8) |
| 20-29   | 40  | (2.3)  | 49.1 (22.1) |
| 30-39   | 147 | (8.3)  | 63.0 (18.6) |
| 40-49   | 43  | (24.7) | 68.5 (16.8) |
| 50-59   | 664 | (37.6) | 77.1 (13.9) |
| 60-70   | 457 | (25.9) | 82.5 (13.5) |
| Missing | 1   | (1.0)  | 69.6 (20.5) |

**Sleep Condition Indicator (SCI score)**

|         |     |        |             |
|---------|-----|--------|-------------|
| 0 to <2 | 67  | (3.8)  | 51.2 (22.3) |
| 2 to <4 | 264 | (14.9) | 62.2 (19.5) |
| 4 to <6 | 646 | (36.6) | 74.3 (14.6) |
| 6 to <8 | 384 | (21.7) | 77.6 (14.2) |
| 8 to 10 | 386 | (21.8) | 83.5 (12.2) |
| Missing | 20  | (1.1)  | 77.3 (12.8) |

**AUDIT-C score**

|               |     |        |             |
|---------------|-----|--------|-------------|
| Non-hazardous | 776 | (43.9) | 74.0 (17.4) |
| Hazardous     | 915 | (51.8) | 74.6 (16.9) |
| Missing       | 76  | (4.3)  | 75.0 (17.0) |

**Brief Trauma Questionnaire  
(DSM-IV criteria)**

|             |      |        |             |
|-------------|------|--------|-------------|
| Not exposed | 544  | (30.8) | 78.3 (15.1) |
| Exposed     | 1210 | (68.5) | 72.5 (17.8) |
| Missing     | 13   | (0.7)  | 80.6 (8.1)  |

STROBE Statement—Checklist of items that should be included in reports of *cross-sectional studies*

|                              | Item No | Recommendation                                                                                                                                                                                                                                                                                                                                                                                                                                                                              |
|------------------------------|---------|---------------------------------------------------------------------------------------------------------------------------------------------------------------------------------------------------------------------------------------------------------------------------------------------------------------------------------------------------------------------------------------------------------------------------------------------------------------------------------------------|
| <b>Title and abstract</b>    | 1       | Indicate the study's design with a commonly used term in the title or the abstract.<br><b>Yes, a cross sectional study, p1 title.</b><br>(b) Provide in the abstract an informative and balanced summary of what was done and what was found <b>Background, results and conclusions, p 1</b>                                                                                                                                                                                                |
| <b>Introduction</b>          |         |                                                                                                                                                                                                                                                                                                                                                                                                                                                                                             |
| Background/rationale         | 2       | Explain the scientific background and rationale for the investigation being reported<br><b>Introduction p2.</b>                                                                                                                                                                                                                                                                                                                                                                             |
| Objectives                   | 3       | State specific objectives, including any prespecified hypotheses <b>p2, lines 59 and 60</b>                                                                                                                                                                                                                                                                                                                                                                                                 |
| <b>Methods</b>               |         |                                                                                                                                                                                                                                                                                                                                                                                                                                                                                             |
| Study design                 | 4       | Present key elements of study design early in the paper <b>p2 line 62 to page 5 line 145</b>                                                                                                                                                                                                                                                                                                                                                                                                |
| Setting                      | 5       | Describe the setting, locations, and relevant dates, including periods of recruitment, exposure, follow-up, and data collection <b>Participants, page2 line 63- page 3 line 83.</b>                                                                                                                                                                                                                                                                                                         |
| Participants                 | 6       | (a) Give the eligibility criteria, and the sources and methods of selection of participants <b>page 2 line 64 to page 3, line 68.</b>                                                                                                                                                                                                                                                                                                                                                       |
| Variables                    | 7       | Clearly define all outcomes, exposures, predictors, potential confounders, and effect modifiers. Give diagnostic criteria, if applicable <b>Questionnaire, pp 3-5.</b>                                                                                                                                                                                                                                                                                                                      |
| Data sources/<br>measurement | 8*      | For each variable of interest, give sources of data and details of methods of assessment (measurement). Describe comparability of assessment methods if there is more than one group <b>as above</b>                                                                                                                                                                                                                                                                                        |
| Bias                         | 9       | Describe any efforts to address potential sources of bias <b>Methods, page 3. Lines 76-83.</b>                                                                                                                                                                                                                                                                                                                                                                                              |
| Study size                   | 10      | Explain how the study size was arrived at <b>p5 line 137</b>                                                                                                                                                                                                                                                                                                                                                                                                                                |
| Quantitative variables       | 11      | Explain how quantitative variables were handled in the analyses. If applicable, describe which groupings were chosen and why Cases defined through the <b>Multivariable logistic regression with the EQ-Visual analogue scale as the outcome measure, p5 lines 131-136</b>                                                                                                                                                                                                                  |
| Statistical methods          | 12      | (a) Describe all statistical methods, including those used to control for confounding <b>Backward elimination process p5 lines 134-135</b><br>(b) Describe any methods used to examine subgroups and interactions <b>By multivariable logistic regression, p5 as above</b><br>(c) Explain how missing data were addressed <b>p4 lines 122-125</b><br>(d) If applicable, describe analytical methods taking account of sampling strategy<br>N/A<br>(e) Describe any sensitivity analyses N/A |
| <b>Results</b>               |         |                                                                                                                                                                                                                                                                                                                                                                                                                                                                                             |
| Participants                 | 13*     | (a) Report numbers of individuals at each stage of study—eg numbers potentially eligible, examined for eligibility, confirmed eligible, included in the study, completing follow-up, and analysed <b>Potentially eligible lines 68-73 p 3</b><br>(b) Give reasons for non-participation at each stage N/A<br>(c) Consider use of a flow diagram N/A                                                                                                                                         |

|                          |     |                                                                                                                                                                                                                                                                                                                                                                                                                                                                                                                                                                             |
|--------------------------|-----|-----------------------------------------------------------------------------------------------------------------------------------------------------------------------------------------------------------------------------------------------------------------------------------------------------------------------------------------------------------------------------------------------------------------------------------------------------------------------------------------------------------------------------------------------------------------------------|
| Descriptive data         | 14* | (a) Give characteristics of study participants (eg demographic, clinical, social) and information on exposures and potential confounders <b>page 5 et seq, table 1</b><br>(b) Indicate number of participants with missing data for each variable of interest ' <b>n used</b> ' columns <b>tables 2 and 3.</b>                                                                                                                                                                                                                                                              |
| Outcome data             | 15* | Report numbers of outcome events or summary measures <b>as per tables</b>                                                                                                                                                                                                                                                                                                                                                                                                                                                                                                   |
| Main results             | 16  | (a) Give unadjusted estimates and, if applicable, confounder-adjusted estimates and their precision (eg, 95% confidence interval). Make clear which confounders were adjusted for and why they were included <b>Tables, adjusted for age, sex, service years and deployment status.</b><br>(b) Report category boundaries when continuous variables were categorized. <b>Independent variables, p 3 and 4, EQ-VAS is a continuous scale.</b><br>(c) If relevant, consider translating estimates of relative risk into absolute risk for a meaningful time period <b>N/A</b> |
| Other analyses           | 17  | Report other analyses done—eg analyses of subgroups and interactions, and sensitivity analyses <b>N/A</b>                                                                                                                                                                                                                                                                                                                                                                                                                                                                   |
| <b>Discussion</b>        |     |                                                                                                                                                                                                                                                                                                                                                                                                                                                                                                                                                                             |
| Key results              | 18  | Summarise key results with reference to study objectives <b>Discussion, p11 first para</b>                                                                                                                                                                                                                                                                                                                                                                                                                                                                                  |
| Limitations              | 19  | Discuss limitations of the study, taking into account sources of potential bias or imprecision. Discuss both direction and magnitude of any potential bias <b>Discussion lines 215 et seq.</b>                                                                                                                                                                                                                                                                                                                                                                              |
| Interpretation           | 20  | Give a cautious overall interpretation of results considering objectives, limitations, multiplicity of analyses, results from similar studies, and other relevant evidence <b>Discussion, p12 lines 230 et seq.</b>                                                                                                                                                                                                                                                                                                                                                         |
| Generalisability         | 21  | Discuss the generalisability (external validity) of the study results <b>p17, line 215 et seq.</b>                                                                                                                                                                                                                                                                                                                                                                                                                                                                          |
| <b>Other information</b> |     |                                                                                                                                                                                                                                                                                                                                                                                                                                                                                                                                                                             |
| Funding                  | 22  | Give the source of funding and the role of the funders for the present study and, if applicable, for the original study on which the present article is based <b>Funding, p18</b>                                                                                                                                                                                                                                                                                                                                                                                           |

\*Give information separately for exposed and unexposed groups.

**Note:** An Explanation and Elaboration article discusses each checklist item and gives methodological background and published examples of transparent reporting. The STROBE checklist is best used in conjunction with this article (freely available on the Web sites of PLoS Medicine at <http://www.plosmedicine.org/>, Annals of Internal Medicine at <http://www.annals.org/>, and Epidemiology at <http://www.epidem.com/>). Information on the STROBE Initiative is available at [www.strobe-statement.org](http://www.strobe-statement.org).

# BMJ Open

## Factors associated with self-reported health among New Zealand military veterans: a cross-sectional study.

|                                 |                                                                                                                                                                                                                                                                                                                                                                                                                                                                                                                                                                                                                                                                                                                                        |
|---------------------------------|----------------------------------------------------------------------------------------------------------------------------------------------------------------------------------------------------------------------------------------------------------------------------------------------------------------------------------------------------------------------------------------------------------------------------------------------------------------------------------------------------------------------------------------------------------------------------------------------------------------------------------------------------------------------------------------------------------------------------------------|
| Journal:                        | <i>BMJ Open</i>                                                                                                                                                                                                                                                                                                                                                                                                                                                                                                                                                                                                                                                                                                                        |
| Manuscript ID                   | bmjopen-2021-056916.R3                                                                                                                                                                                                                                                                                                                                                                                                                                                                                                                                                                                                                                                                                                                 |
| Article Type:                   | Original research                                                                                                                                                                                                                                                                                                                                                                                                                                                                                                                                                                                                                                                                                                                      |
| Date Submitted by the Author:   | 01-May-2022                                                                                                                                                                                                                                                                                                                                                                                                                                                                                                                                                                                                                                                                                                                            |
| Complete List of Authors:       | McBride, David; University of Otago Dunedin School of Medicine, Department of Preventive and Social Medicine<br>Samaranayaka, Ariyapala; University of Otago Division of Health Sciences, Biostatistics Centre<br>Richardson, Amy; University of Otago Dunedin School of Medicine, Preventive and Social Medicine<br>Gardner, D; Massey University, Department of Psychology<br>Shepherd, Daniel; Auckland University of Technology, Health Sciences<br>Wyeth, Emma; University of Otago, Ngāi Tahu Māori Health Research Unit<br>de Graaf, Brandon; University of Otago Dunedin School of Medicine, Injury Prevention Research Unit<br>Derrett, Sarah; University of Otago Dunedin School of Medicine, Preventive and Social Medicine |
| <b>Primary Subject Heading</b>: | Epidemiology                                                                                                                                                                                                                                                                                                                                                                                                                                                                                                                                                                                                                                                                                                                           |
| Secondary Subject Heading:      | Occupational and environmental medicine, Public health                                                                                                                                                                                                                                                                                                                                                                                                                                                                                                                                                                                                                                                                                 |
| Keywords:                       | EPIDEMIOLOGY, OCCUPATIONAL & INDUSTRIAL MEDICINE, Health & safety < HEALTH SERVICES ADMINISTRATION & MANAGEMENT, Risk management < HEALTH SERVICES ADMINISTRATION & MANAGEMENT, MENTAL HEALTH, Musculoskeletal disorders < ORTHOPAEDIC & TRAUMA SURGERY                                                                                                                                                                                                                                                                                                                                                                                                                                                                                |
|                                 |                                                                                                                                                                                                                                                                                                                                                                                                                                                                                                                                                                                                                                                                                                                                        |

SCHOLARONE™  
Manuscripts





I, the Submitting Author has the right to grant and does grant on behalf of all authors of the Work (as defined in the below author licence), an exclusive licence and/or a non-exclusive licence for contributions from authors who are: i) UK Crown employees; ii) where BMJ has agreed a CC-BY licence shall apply, and/or iii) in accordance with the terms applicable for US Federal Government officers or employees acting as part of their official duties; on a worldwide, perpetual, irrevocable, royalty-free basis to BMJ Publishing Group Ltd ("BMJ") its licensees and where the relevant Journal is co-owned by BMJ to the co-owners of the Journal, to publish the Work in this journal and any other BMJ products and to exploit all rights, as set out in our [licence](#).

The Submitting Author accepts and understands that any supply made under these terms is made by BMJ to the Submitting Author unless you are acting as an employee on behalf of your employer or a postgraduate student of an affiliated institution which is paying any applicable article publishing charge ("APC") for Open Access articles. Where the Submitting Author wishes to make the Work available on an Open Access basis (and intends to pay the relevant APC), the terms of reuse of such Open Access shall be governed by a Creative Commons licence – details of these licences and which [Creative Commons](#) licence will apply to this Work are set out in our licence referred to above.

Other than as permitted in any relevant BMJ Author's Self Archiving Policies, I confirm this Work has not been accepted for publication elsewhere, is not being considered for publication elsewhere and does not duplicate material already published. I confirm all authors consent to publication of this Work and authorise the granting of this licence.

1  
2  
3 1 **FACTORS ASSOCIATED WITH SELF-REPORTED HEALTH AMONG NEW ZEALAND**  
4  
5 2 **MILITARY VETERANS: A CROSS-SECTIONAL STUDY**

6  
7 3 David McBride,<sup>1</sup> Ari Samaranayaka<sup>2</sup>, Amy Richardson,<sup>1</sup> Dianne Gardner,<sup>3</sup> Daniel Shepherd,<sup>4</sup>  
8  
9 4 Emma H. Wyeth<sup>5</sup>, Brandon deGraaf,<sup>6</sup> Sarah Derrett.<sup>1</sup>

10  
11 5 <sup>1</sup>Department of Preventive and Social Medicine, Dunedin School of Medicine, University of  
12  
13 6 Otago, New Zealand.

14  
15 7 <sup>2</sup>Biostatistics Centre, Division of Health Sciences, University of Otago, Dunedin, New Zealand.

16  
17 8 <sup>3</sup>School of Psychology, Massey University, New Zealand.

18  
19 9 <sup>4</sup>Department of Psychology, Auckland University of Technology, New Zealand.

20  
21 10 <sup>5</sup>Ngāi Tahu Māori Health Research Unit, Department of Preventive and Social Medicine,  
22  
23 11 Dunedin School of Medicine, University of Otago, New Zealand.

24  
25 12 <sup>6</sup>Injury Prevention Research Unit, Department of Preventive and Social Medicine, Dunedin  
26  
27 13 School of Medicine, University of Otago, New Zealand.

28  
29 14 **Keywords:**

30  
31 15 Military Medicine

32  
33 16 Quality of Life

34  
35 17 Risk Factors

36  
37 18 Protective Factors

38  
39 19 Point Prevalence

40  
41 20 **Word count**

42  
43 21 3132

44  
45 22 **Corresponding Author:**

46  
47 23 David McBride, Department of Preventive and Social Medicine, Adams Building, 18 Frederick  
48  
49 24 Street, Dunedin 9017, New Zealand.

50  
51 25 Email: [david.mcbride@otago.ac.nz](mailto:david.mcbride@otago.ac.nz)

52  
53 26 Phone: +64 3 479 7208

54  
55 27 Fax +64 3 479 7298

56  
57 28

1  
2 29 **ABSTRACT**  
3

4 30 **Objective**

5 31 To identify factors associated with better or poorer self-reported health status in New Zealand  
6  
7 32 military Veterans.

8  
9 33 **Design**

10 34 A cross-sectional survey.

11  
12 35 **Participants**

13 36 The participants of interest were the 3,874 currently serving Veterans who had been deployed  
14  
15 37 to a conflict zone, but all Veterans were eligible to participate.

16  
17 38 **Study variables**

18 39 The EQ-5D-5L, asking about problems across five dimensions (mobility, self-care, usual  
19  
20 40 activities, pain or discomfort, and anxiety or depression), with five levels of severity (e.g. no,  
21  
22 41 slight, moderate, severe or extreme problems), also containing a visual analogue scale (EQ-  
23  
24 42 VAS), scaled from 0 (worst) to 100 (best) imagined health, assessed health status. Hypothetical  
25  
26 43 relationships with better health were positive social support, sleep and psychological  
27  
28 44 flexibility; with poorer health, post-traumatic stress, exposure to psychological trauma,  
29  
30 45 distress and hazardous drinking.

31  
32 46 **Results:**

33 47 The EQ5-D was completed by 1767 Veterans, 1009 serving, a response rate of 26% from that  
34  
35 48 group, 1767 completing the EQ5-D, 1458 who had deployed, 288 who had not, and the 21  
36  
37 49 who did not provide deployment data. Of these 247 were not used in the analysis due to  
38  
39 50 missing values in one or more variables, leaving 1,520 for analysis.

40 51 A significantly higher proportion of Veterans reported 'any problems' rather than 'no  
41  
42 52 problems' with four EQ-5D dimensions: mobility, self-care, usual activities and pain or  
43  
44 53 discomfort, but no difference in anxiety or depression. Age, length of service, deployment,  
45  
46 54 psychological flexibility and better sleep quality were associated with higher EQ-VAS scores;  
47  
48 55 distress with lower EQ-VAS scores.

49  
50 56 **Conclusion:**

51 57 In this sample of New Zealand Veterans, psychological flexibility and good sleep are associated  
52  
53 58 with better self-rated health, and distress and poor sleep with diminished health. These  
54  
55 59 factors might be used as sentinel health indicators in assessing Veteran health status, and  
56  
57 60 cognitive behavioural therapy encompassing these domains may be useful in improving the  
58  
59 61 health of New Zealand Veterans.  
60

1  
2  
3  
4  
5  
6  
7  
8  
9  
10  
11  
12  
13  
14  
15  
16  
17  
18  
19  
20  
21  
22  
23  
24  
25  
26  
27  
28  
29  
30  
31  
32  
33  
34  
35  
36  
37  
38  
39  
40  
41  
42  
43  
44  
45  
46  
47  
48  
49  
50  
51  
52  
53  
54  
55  
56  
57  
58  
59  
60

62 **Keywords:**

63 Self-rated health, wellbeing, EQ-5D, Veterans, deployment, military, risk factors.

64 **Strengths and limitations of this study**

- 65 • Many studies of Veterans have focused on adverse outcomes, but we have been able  
66 to focus on a holistic measure of 'health'.
- 67 • The study was sufficiently powered to detect important relationships indicating  
68 opportunities for intervention.
- 69 • The exact response rate is unknown, and sampling bias may be a limitation.
- 70 • The cross-sectional design means that we cannot explore cause and effect  
71 relationships.

72 **INTRODUCTION**

73 The three major events in the military life course are entry to military service, deployment on  
74 active service and transition back to civilian life. On entry, soldiers, sailors and air personnel  
75 are subject to a selection process to ensure, as far as possible, good physical and mental  
76 health, giving rise to the 'healthy soldier effect,' with service personnel being, on average,  
77 healthier than the general population.[1] However, the physical and psychological stressors  
78 of military service have been found to erode this effect.[2]

79 The physical stressors have a particular impact on the lower limb, with load carriage, high  
80 intensity training and the design of footwear being implicated in injury causation.[3] A military  
81 career also increases opportunities for psychological trauma, and post-traumatic stress  
82 disorder (PTSD) has been identified as the 'signature injury' of United States service men and  
83 women deployed to Afghanistan and Iraq.[4]

84 A focus on adverse health events in the literature[5] means that wellbeing is relatively  
85 overlooked. In the long run, military service has been found to have positive effects.[6,7]  
86 Good health after service does, however, depend on the success of the 'military civilian  
87 transition', a complex process for which models have been developed.[8] Health problems  
88 developed in service, difficulty in assuming a post-service identity and many other factors  
89 contribute to health and wellbeing outcomes.[8] In New Zealand, military Veterans can only  
90 access assistance from New Zealand Veteran's Affairs (NZVA) if they have undertaken  
91 'qualifying operational service' as defined by the Veteran Support Act 2014,[9] thus being  
92 Veterans in a legal sense. NZVA support some 12,000 Veterans, with an average age of 80  
93 years, 5000 being actively case managed.[10] The majority will have seen operational service  
94 in Korea, Borneo, Malaya and Vietnam. Post-Vietnam, smaller numbers deployed on United

1  
2 95 Nations and other missions, but the tempo of operations rose with the deployment to  
3  
4 96 Bosnia in 1992, and some 9,000-10,000 'legal' Veterans deployed between then and the  
5  
6 97 withdrawal of New Zealand troops from Afghanistan in 2021. The Ministerial Veteran's  
7  
8 98 Health Advisory Panel, established under the Veteran Support Act, are specifically charged  
9  
10 99 with funding research on this 'contemporary Veteran' group, NZVA acknowledging that they  
11  
12 100 "have had different experiences, and have different needs, compared to the older veterans.  
13  
14 101 They are likely to have served in a number of deployments during their career, and come to  
15  
16 102 us with more complex health issues." [10]

17 103 The aims of this study were therefore to describe self-reported health among these Veterans,  
18  
19 104 and identify factors associated with better or poorer health.

### 20 105 **Veteran and public involvement**

21 106 The Ministerial Veterans Health Advisory Panel, [10] commissioned the study and advised on  
22  
23 107 the design. We also formed a steering group with representatives from the New Zealand  
24  
25 108 Defence Force, New Zealand Veterans Affairs, the Royal New Zealand Returned and Services  
26  
27 109 Association (RSA) [11] and No Duff, [12] a charity providing first response support to Veterans  
28  
29 110 and their families. We also consulted with the Ngāi Tahu Research Consultation Committee in  
30  
31 111 order to assess the importance of the project to Māori, New Zealand's indigenous population.  
32  
33 112 During consultation we undertook to inform the Veteran community before releasing the  
34  
35 113 results, to which end a link to the paper will be posted on the military social media sites where  
36  
37 114 the study was advertised, and to give all NZ Veterans, defined as anyone who had served in  
38  
39 115 the military, an opportunity to participate. Participants were not recruited as patients.

## 40 116 **METHODS**

### 41 117 **Participants**

42  
43 118 Potential participants were currently serving Veterans, as indicated by holding the New  
44  
45 119 Zealand Operational Service Medal at the time of the survey, a total of 3,874 personnel at that  
46  
47 120 time; retired 'legal' Veterans in the community; and Veterans who had served, but had not  
48  
49 121 deployed to a conflict. Data were collected via an online survey, a postal version being  
50  
51 122 available on request. There is no comprehensive Veteran registry, however in July 2018, a link  
52  
53 123 to the online questionnaire was sent by email to the 3,874 currently serving regular and  
54  
55 124 reserve New Zealand Defence Force (NZDF) members registered on the NZDF email system  
56  
57 125 who were 'legal Veterans', as indicated by holding the New Zealand Operational Service  
58  
59 126 Medal. An introductory message and link to the questionnaire were also presented on the  
60  
127 NZDF 'intranet landing page', a secure internal webpage from which all regular force

1  
2 128 personnel can access relevant work-related content, tools, and resources. Retired military  
3  
4 129 personnel were invited to participate through posters distributed to reserve units and the 43  
5  
6 130 local social clubs identified by the RSA national office to be 'Veteran active.' Paper  
7  
8 131 questionnaires with return postage envelopes were made available at these sites.  
9  
10 132 Announcements were also made on military social media pages, and both retired and  
11  
12 133 currently serving personnel were invited to participate through an announcement on the No  
13  
14 134 Duff website. The questionnaire was available for completion from June to December 2018.

### 15 135 **Ethics approval**

16 136 Ethics approval for the study was obtained from the Northern B Health and Disability Ethics  
17  
18 137 Committee, reference 17NTB118.

### 19 138 **Questionnaire**

#### 20 139 *Criterion variable*

21  
22 140 Self-rated health status was assessed using the EQ-5D-5L,[13] a short questionnaire asking  
23  
24 141 about the respondent's health across five dimensions: mobility, self-care, usual activities, pain  
25  
26 142 or discomfort and anxiety or depression, with response options ranging from (e.g.) 'no  
27  
28 143 problems', to 'extreme problems'. For each dimension, participants were categorised as  
29  
30 144 having 'any problems' if they selected any response other than 'no problems'.

31  
32 145 Additionally, the EQ-5D-5L visual analogue scale (EQ-VAS) asks the respondent to mark on a  
33  
34 146 vertical visual analogue scale (VAS) how good or bad their health is today, where the  
35  
36 147 endpoints are labelled 'the best health you can imagine' (score of 100) and 'the worst health  
37  
38 148 you can imagine' (score of 0).

#### 39 149 *Independent variables*

40  
41 150 Demographic characteristics included age, sex, ethnicity, service years, and past deployment  
42  
43 151 on operational service (yes/no). Ethnicity prioritisation was adopted,[14] whereby  
44  
45 152 participants with multiple responses were assigned to one of the categories, in the order of  
46  
47 153 Māori, Pacific Peoples, Other and European.

48  
49 154 Symptoms of PTS were assessed using the post-traumatic stress disorder (PTSD) checklist –  
50  
51 155 military version (PCL-M). The PCL-M includes 17 items that ask about DSM-IV symptoms of  
52  
53 156 PTS related to stressful military experiences, with response options ranging from 1 'Not at all'  
54  
55 157 to 5 'Extremely' (33). A total symptom severity score is calculated by summing responses to  
56  
57 158 each option (range = 17 – 85). While scores of 30-35 indicate significant PTS symptomology  
58  
59 159 and probable cases of PTSD, scores of  $\geq 45$  indicate a presumptive PTSD diagnosis. [15]  
60

1  
2 160 General psychiatric morbidity was assessed using the 12-item General Health Questionnaire  
3  
4 161 (GHQ-12),[16] scored using a four point scale (0-3) and summing the 12 items to give a total  
5  
6 162 score, with higher scores indicating elevated distress.

7 163 Social support was measured using the Social Provisions Scale,[17] with responses made on a  
8  
9 164 four-point Likert-type scale ranging from 1 'strongly disagree' to 4 'strongly agree'. The 24  
10  
11 165 items can be reduced to six subscales (attachment, social integration, reassurance of worth,  
12  
13 166 reliable alliance, social guidance and opportunity for nurturance) or summed to create a total  
14  
15 167 score, with greater scores indicating greater social support.

16 168 Alcohol use was measured using the AUDIT-C,[18] scaled from 0-12. A score of 3+ for women  
17  
18 169 and 4+ for men indicated potentially hazardous drinking behaviour.

19  
20 170 Sleep quality was assessed with the Sleep Condition Indicator (SCI), [19] assessing insomnia as  
21  
22 171 described in the Diagnostic and Statistical Manual of Mental Disorders version 5 (DSM-V).[20]  
23  
24 172 The SCI consists of eight items rated from 0-4, the total scores being scaled to a range of 0 to  
25  
26 173 10, where higher scores represent better sleep.

27 174 Trauma exposure was assessed with the Brief Trauma Scale (BTS),[21] which captures past  
28  
29 175 exposure to situations that were life threatening or capable of producing serious injury.

30  
31 176 Psychological flexibility was measured with the 10-item AAQ-II, designed as a measure of  
32  
33 177 effectiveness in a particular mode of behavioural intervention, Acceptance and Commitment  
34  
35 178 Therapy (ACT).[22] Items were answered on a 7-point scale, with options ranging from 'never  
36  
37 179 true' to 'always true'. The items were summed to obtain a total score (possible range 10 to  
38  
39 180 70), with higher scores indicative of greater psychological flexibility.

#### 40 181 **Statistical analyses**

41  
42 182 With respect to the calculation of summed scores, if only one item was missing for a particular  
43  
44 183 measure then this was imputed with the mean of the remaining items; if more than one item  
45  
46 184 was missing then the score was set to missing for that participant. Complete case analysis was  
47  
48 185 used in the remaining analyses. Z tests were used to compare the five dimensions of the EQ-  
49  
50 186 5D-5L to the NZ population normative values.[23]

51 187 Univariate ordinary least-squares linear regression analyses assessed the strength of  
52  
53 188 relationships between each independent variable and EQ-VAS scores, using robust standard  
54  
55 189 errors to account for heteroscedasticity and calculating 95% confidence intervals (95% CIs).

56  
57 190 Multivariable linear regression was then used to identify the role of the independent variables  
58  
59 191 while adjusting for each other. None of the social support sub-scales were used in this  
60  
192 multivariable model, instead using the social support total score. The model was built using

backward variable selection with  $p < 0.10$  for variable retention, with the exceptions of age, sex, service years, and deployment status which were retained as adjusting variables irrespective of  $p$ -values. Cronbach's  $\alpha$ , ( $C_\alpha$ ) was used to assess the internal consistency of the scales used.[24] A value of alpha greater than 0.7 is considered adequate.[25] Collinearity was assessed by calculating the Pearson correlation coefficient ( $r$ ); if  $0 < r < 1$  there is a positive linear trend.

## RESULTS

The EQ-5D was completed by 1767 Veterans, 1009 who were serving (26% of that group), 458 who had retired, 288 who had not deployed, and 21 who did not provide deployment data.

There are no reliable denominator data on retired and non-deployed Veterans in New Zealand.

To facilitate a complete case analysis, 247 replies were not used due to missing values in one or more variables, the final sample including 1520 individuals.

A supplementary table presents the EQ-VAS score according to the sample characteristics.

Figure 1 shows the proportion of EQ-5D-5L dimension responses reporting 'any problem' severity level other than 'no problems' in comparison to the New Zealand population normative values,[23] with Table 1 showing the 95% CI's and Z values.

### Figure 1 about here

Table 1, Proportion of 'any problem' in EQ-5D domains

| Domain             | Veterans            | NZ population       | Z value (p)  |
|--------------------|---------------------|---------------------|--------------|
|                    | Proportion (95% CI) | Proportion (95% CI) |              |
| Mobility           | 0.40 (0.38-0.43)    | 0.28 (0.26-0.30)    | 8.5 (<.0001) |
| Self-care          | 0.11 (0.10-0.13)    | 0.09 (0.07-0.10)    | 2.8 (0.03)   |
| Usual activities   | 0.38 (0.35-0.40)    | 0.30 (0.28-0.31)    | 5.6 (<.001)  |
| Pain/discomfort    | 0.75 (0.73-0.77)    | 0.62 (0.60-0.63)    | 9.0 (<.0001) |
| Anxiety/depression | 0.47 (0.44-0.49)    | 0.46 (0.44-0.48)    | 0 (1.0)      |

212

The results of the univariate analysis are displayed in Table 2. Here, for continuous characteristics, the regression coefficient ( $\beta$ ) represents the change in the mean EQ-VAS associated with one unit increase in the characteristic. For categorical characteristics,  $\beta$  is the change in mean EQ-VAS scores compared to the referent category.



217 **Table 2: Univariate cross-sectional associations between variables and mean EQ-VAS scores**  
 218 **for New Zealand Veterans (N=1,520)**

| Characteristic               | $C_{\alpha}^*$ | <i>n</i> | $\beta$ | 95%<br>CIs     | <i>p</i> -value |
|------------------------------|----------------|----------|---------|----------------|-----------------|
| Age**                        | -              | 1520     | -0.18   | [-0.24, -0.12] | <0.01           |
| Sex                          |                |          |         |                |                 |
| Female                       | -              | 189      | Ref     |                |                 |
| Male                         | -              | 1331     | -0.15   | [-2.76, 2.46]  | 0.91            |
| Ethnicity                    | -              |          |         |                |                 |
| NZ European                  | -              | 1193     | Ref     |                | 0.13            |
| Māori                        | -              | 214      | 0.82    | [-1.56, 3.19]  |                 |
| Other                        | -              | 113      | -3.55   | [-7.33, 0.23]  |                 |
| Service years*               | -              | 1520     | 0.19    | [0.11, 0.28]   | <0.01           |
| Deployment status            | -              |          |         |                |                 |
| Not deployed                 | -              | 242      | ref     |                |                 |
| Deployed                     | -              | 1278     | 6.56    | [3.85, 9.26]   | <0.01           |
| GHQ-12 score*                | 0.89           | 1520     | -1.63   | [-1.81, -1.46] | <0.01           |
| Social support*              |                | 1520     | 2.05    | [1.70, 2.41]   | <0.01           |
| Attachment                   | 0.81           | 1520     | 2.47    | [2.02, 2.92]   | <0.01           |
| Social integration           | 0.79           | 1520     | 2.49    | [2.08, 2.91]   | <0.01           |
| Reassurance of worth         | 0.77           | 1520     | 2.39    | [1.97, 2.82]   | <0.01           |
| Reliable alliance            | 0.81           | 1520     | 2.01    | [1.63, 2.39]   | <0.01           |
| Social guidance              | 0.84           | 1520     | 0.83    | [0.40, 1.25]   | <0.01           |
| Opportunity for nurturance   | 0.75           | 1520     | 0.53    | [0.44, 0.61]   | <0.01           |
| Social support total score   | -              | 1520     | 0.80    | [0.71, 0.88]   | <0.01           |
| Psychological flexibility*   | 0.93           | 1520     | 3.56    | [3.18, 3.95]   | <0.01           |
| Sleep score*                 | 0.87           |          |         |                | <0.01           |
| AUDIT-C                      | 0.67           | 707      | Ref     |                |                 |
| Non-hazardous                |                | 813      | 0.71    | [-1.04, 2.45]  | 0.43            |
| Hazardous                    |                |          |         |                |                 |
| Exposure to traumatic events | -              |          |         |                |                 |
| Not exposed                  |                | 454      | Ref     |                |                 |
| Exposed                      |                | 1066     | -5.62   | [-7.39, 3.86]  | <0.01           |
| PTSD (PCL-M Score)*          |                | 1520     | -0.67   | [-0.75, -0.60] | <0.01           |

\*Cronbach's  $\alpha$

\*\*Scored as continuous variables, coefficient is per unit increase

Of the demographic variables, age was associated with lower EQ-VAS scores, length of service with higher scores. No relationships were apparent for sex or ethnicity. Positive coefficients, indicating better health with presence of the characteristic, were present for dichotomous variables of deployment, where the mean EQ-VAS score for deployed Veterans was 6.56 VAS units higher (better) than for non-deployed. The largest negative associations were for exposure to traumatic events, with a mean EQ-VAS score 5.62 lower for those exposed compared to those not exposed. Distress, as measured by the GHQ-12, had a negative

1  
2 229 association with health state, as did PTSD as measured by the PCL-M. Positive associations  
3  
4 230 with health state were found for psychological flexibility as measured by the AAQ-II, better  
5  
6 231 sleep scores, the total support scores and the individual dimensions.

7 232 Table 3 shows the results from two multivariable models. The first model is adjusted for the  
8  
9 233 other characteristics, with 12 variables included in the model. All effect sizes were reduced,  
10  
11 234 and the social support and AUDIT-C scores were no longer associated.

12  
13 235 The final model involved backward variable selection setting a p-value of 0.10, identifying a  
14  
15 236 smaller subset of variables. Age, sex, service years, and deployment status were retained in  
16  
17 237 the model irrespective of their p-values, thus adjusting for those variables. Social support  
18  
19 238 and AUDIT-C hazardous drinking were not retained in this final model; other coefficients  
20  
21 239 remaining essentially the same.  
22  
23  
24  
25  
26  
27  
28  
29  
30  
31  
32  
33  
34  
35  
36  
37  
38  
39  
40  
41  
42  
43  
44  
45  
46  
47  
48  
49  
50  
51  
52  
53  
54  
55  
56  
57  
58  
59  
60

**Table 3. Multivariable models of associations between variables and mean EQ-VAS scores for New Zealand Veterans**

| Characteristic                           | Adjusted model, N =1,520 |                |         | Final model, N =1,520 |                |         |
|------------------------------------------|--------------------------|----------------|---------|-----------------------|----------------|---------|
|                                          | $\beta$                  | 95% CI         | p-value | $\beta$               | 95% CI         | p-value |
| Age (years)*                             | -0.15                    | [-0.21, -0.10] | <0.01   | -0.16                 | [-0.22, -0.10] | <0.01   |
| Sex                                      |                          |                |         |                       |                |         |
| Female                                   | Ref                      |                |         | Ref                   |                |         |
| Male                                     | 0.06                     | [-0.23, 2.35]  | 0.96    | 0.02                  | [-2.27, 2.30]  | 0.99    |
| Ethnicity                                |                          |                |         |                       |                |         |
| NZ European                              | Ref                      |                | 0.03    | Ref                   |                | 0.03    |
| Māori                                    | 0.53                     | [-1.46, 2.53]  |         | 0.55                  | [-1.44, 2.54]  |         |
| Other                                    | -4.04                    | [-7.12, -0.95] |         | -4.07                 | [-7.16, -0.99] |         |
| Service years*                           | 0.16                     | [0.09, 0.24]   | <0.01   | 0.17                  | [0.09, 0.24]   | <0.01   |
| Deployment status                        |                          |                |         |                       |                |         |
| Not deployed                             | Ref                      |                |         | Ref                   |                |         |
| Deployed                                 | 3.33                     | [1.00, 5.67]   | 0.01    | 3.36                  | [1.03, 5.70]   | 0.01    |
| GHQ12 score*                             | -0.83                    | [-1.06, -0.61] | <0.01   | -0.84                 | [-1.06, -0.62] | <0.01   |
| Social support (SPS score)*              | 0.02                     | [-0.07, 0.11]  | 0.65    | -                     | -              | -       |
| Psychological flexibility score (AAQii)* | 0.18                     | [0.06, 0.31]   | 0.01    | 0.19                  | [0.07, 0.31]   | <0.01   |
| Sleep score (SCI), Range 0-10*           | 1.41                     | [0.95, 1.88]   | <0.01   | 1.41                  | [0.95, 1.87]   | <0.01   |

244 Table 3, continued

|                                    |       |                |      |       |                |      |   |
|------------------------------------|-------|----------------|------|-------|----------------|------|---|
| AUDIT_C score                      |       |                |      |       |                |      |   |
| Non hazardous                      | Ref   |                |      |       |                |      |   |
| Hazardous                          | 0.37  | [-1.05, 1.79]  | 0.61 | -     | -              | -    | - |
| Exposure to traumatic events (BTQ) |       |                |      |       |                |      |   |
| Not exposed                        | Ref   |                |      | Ref   |                |      |   |
| Exposed                            | -1.46 | [-3.02, 0.11]  | 0.07 | -1.45 | [-3.02, 0.12]  | 0.07 |   |
| PTSD (PCL-M Score)*                |       |                |      |       |                |      |   |
|                                    | -0.14 | [-0.25, -0.04] | 0.01 | -0.15 | [-0.25, -0.04] | 0.01 |   |

\*Scored as continuous variables, coefficient is per unit increase.

## 246 **DISCUSSION**

### 247 *Principal findings*

248 With the exception of anxiety or depression, Veterans had a significantly greater proportion  
249 of 'any problem' responses in the EQ-5D dimensions than the general population of New  
250 Zealand.

251 The final model identified variables independently associated with the EQ-VAS score: age,  
252 length of service, deployment, the GHQ score, psychological flexibility, the sleep score and  
253 exposure to traumatic events. The results make conceptual sense in that distress is associated  
254 with reduced EQ-VAS, and psychological flexibility may have a modest protective effect. Age  
255 had a negative association, length of service being positive, most likely due to the 'healthy  
256 soldier' effect.[1] Unusually, Social Support was dropped, however the SPS was found to  
257 correlate significantly with GHQ12 ( $r=0.47$ ), AAQii ( $r=0.56$ ), and SCI scores ( $r=0.36$ ), suggesting  
258 collinearity. There are known to be many other influences on health, including 'social  
259 wellbeing',[5] financial status, personality and non-deployment related stressors,[26] which  
260 we have not measured.

### 261 *Strengths and weaknesses*

262 Strengths of our study were the relatively large sample size, the inclusion of all Veterans, the  
263 assessment of 'health', infrequently investigated in Veteran populations, and the inclusion of  
264 New Zealand Veterans with a range of characteristics, including 'deployed' and 'non-  
265 deployed' Veterans. As a measure of health, the EQ-5D-5L dimensions and EQ-VAS ask about  
266 health on the day that respondents complete the questionnaire, the EQ-VAS end points being,  
267 respectively, the 'best' and 'worst' health they can imagine, so it is a holistic measure of health  
268 state.[27]

269 The response rate of 26% from serving Veterans, along with the unknown total number of  
270 Veterans, raises the question of bias, the direction of which is difficult to assess, as  
271 responses may be more likely from either Veterans with good or poor health. The healthy  
272 soldier effect is well known, service having a positive effect on wellbeing, with serving NZ  
273 Veterans having good access to primary health care through the military system, but the  
274 public health care system is the primary pathway to care for all Veterans, who are also  
275 covered by the 'no fault' accident compensation scheme for accidental injuries and  
276 occupational diseases.[28] Deployed Veterans may be at an advantage, but are covered by  
277 NZVA only if their illness or injury is linked to a particular deployment, and the condition is  
278 listed on the 'Statements of Principle' of the Australian Repatriation Medical Authority.[29]

1  
2 279 We also know that New Veterans tend to be stoic, so they might underestimate their health  
3  
4 280 concerns,[30] and there are likely to be other personal characteristics that we have not  
5  
6 281 measured. We were however able to adjust for deployment status, which did have a positive  
7  
8 282 association with health state. In the interest of minimising responder burden, we used brief  
9  
10 283 scales, which might reduce construct validity. Distress, sleep, psychological flexibility and  
11  
12 284 exposure to traumatic events are likely to be related, so collinearity was difficult to avoid.  
13  
14 285 The confounding effect was greatest for social support, but our finding does not mean that  
15  
16 286 social support is of no importance to Veterans. The precision of the other coefficients may  
17  
18 287 also have been affected. Finally, the cross-sectional design means that we cannot explore  
19  
20 288 cause and effect, so recommendations for future interventions require additional support  
21  
22 289 from longitudinal studies.

### 22 290 *Comparison with other studies*

23  
24 291 We have previously reported factors associated with post-traumatic stress in this group,[31]  
25  
26 292 using the Military Post Traumatic Stress Checklist (PCL-M). Factors associated with higher PCL-  
27  
28 293 M scores were trauma exposure, older age, male gender, and being of Māori ethnicity. Factors  
29  
30 294 associated with lower PCL-M scores were greater length of service, psychological flexibility,  
31  
32 295 and better quality sleep. Using health as the outcome disclosed that Māori did not have poorer  
33  
34 296 self-reported health compared to non-Māori, that deployment had a positive effect, and in  
35  
36 297 the univariate models, all of the dimensions of social support were associated with improved  
37  
38 298 health. The final model also included good sleep and psychological flexibility, providing most  
39  
40 299 of the explanatory power in the model.

41 300 No other studies appear to have used the EQ-VAS as an outcome measure for Veteran health.  
42  
43 301 Boehmer et al.[32] examined wellbeing among participants in the 2000 Behavioural Risk  
44  
45 302 Factor Surveillance System describing health-related quality of life (HRQoL) by sex and military  
46  
47 303 status, active duty, reservists Veterans, or no military service. Participants were asked to rate  
48  
49 304 recent physical health, mental health, and activity limitation. Active duty men were more likely  
50  
51 305 than men without military service to report 14 or more days of activity limitation, pain, and  
52  
53 306 not enough rest in the past 30 days, the mobility and pain findings being similar to our sample.  
54  
55 307 Notably, the predominant reason for medical discharge from the British Armed Forces was  
56  
57 308 musculoskeletal problems.[33]

57 309 Contrary to our finding on deployment, there are reports indicating that non-deployed  
58  
59 310 personnel retain better health than those who have been deployed. Diaz Santana et al.[34]  
60  
311 having carried out a cross-sectional survey of 60,000 U.S. Veterans of Afghanistan and Iraq,

1  
2 312 with 20,563 responses. In contrast to our finding, mental quality of life scores were higher  
3  
4 313 among the non-deployed group compared to the deployed group, though the deployed group  
5  
6 314 reported higher physical quality of life scores compared to the non-deployed. Again in  
7  
8 315 contrast, both mental and physical quality of life were lower among Veterans compared to  
9  
10 316 U.S. population norms.

11 317 Both positive and negative consequences of deployment have been described.[7,35] In a study  
12  
13 318 of Dutch Veterans,[7] two out of three reported a positive effect of deployment on their  
14  
15 319 quality of life at the time of the survey, this being related to positive feelings such as  
16  
17 320 satisfaction or comradeship, but a few having emotions such as frustration or shame. As  
18  
19 321 regards tangible effects,[35] negative consequences included the military 'chain of command',  
20  
21 322 being away from home, and deterioration of marital/significant other relationships. Positive  
22  
23 323 influences include improved financial security, self-improvement, and time to reflect.

24 324 We found sleep to be associated with better health, but sleep difficulties are a common  
25  
26 325 symptom for those with PTSD. McCarthy et al.[36] reported on the 3,157 U.S. military  
27  
28 326 Veterans enrolled in the National Health and Resilience in Veterans Study, in which 27.6%  
29  
30 327 reported poor sleep quality. Path analyses revealed significant associations between poor  
31  
32 328 sleep, severity of PTSD, poorer mental and physical health functioning and lower overall  
33  
34 329 quality of life.

### 35 330 *Future directions*

36  
37 331 The results suggest that distress, psychological flexibility, and sleep have an important  
38  
39 332 relationship with self-rated health among Veterans in this study.

40  
41 333 Reducing distress through the promotion of psychological flexibility might be possible,  
42  
43 334 although our finding here must be subject to caution as several researchers argue that the  
44  
45 335 AAQ-II may be measuring psychological distress and affect rather than psychological  
46  
47 336 inflexibility.[37]

48 337 Sleep in military personnel has been recognised as a 'vital health behaviour' for which policies  
49  
50 338 and guidelines must be developed.[38] Cognitive behavioural therapy for insomnia (CBT-I) is  
51  
52 339 regarded as an effective 'first line' treatment, and a brief intervention has been described for  
53  
54 340 use in Australian general practice.[39]. Our final model showed that distress had a negative  
55  
56 341 association with health, and psychological flexibility had a positive relationship, with sleep  
57  
58 342 most likely related to both of these variables. It would seem important to screen for these  
59  
60 343 conditions prior to transition from the military, as well as among retired Veterans, in order to

1  
2 344 provide targeted support. Further research is needed to examine the potential of cognitive  
3  
4 345 behavioural therapy to improve Veterans' wellbeing.  
5  
6 346

7  
8 347 **REFERENCES**  
9

- 10 348 1. McLaughlin R, Nielsen L, Waller M. An Evaluation of the Effect of Military Service on  
11 349 Mortality: Quantifying the Healthy Soldier Effect. *Ann Epidemiol*. 2008;18(2):928-936.  
12 350 2. Bollinger MJ, Schmidt S, Pugh JA et al. Erosion of the healthy soldier effect in Veterans  
13 351 of US military service in Iraq and Afghanistan. *Popul Health Metr*. 2015;13:8.  
14 352 3. Kimberley A, Andersen KA, Grimshaw PN et al. Musculoskeletal Lower Limb Injury Risk  
15 353 in Army Populations. *Sports Med-Open* 2016;2:22. DOI 10.1186/s40798-016-0046-z.  
16 354 4. Hoge CW, Castro CA, Messer SC et al. Combat duty in Iraq and Afghanistan, mental  
17 355 health problems, and barriers to care. *N Engl J Med*. 2004;351(1):13–22.  
18 356 5. Oster C, Morello A, Venning A et al. The health and wellbeing needs of Veterans: a  
19 357 rapid review. *BMC Psychiatry*. 2017;17(1):414.  
20 358 6. Spiro A, 3rd, Settersten RA, Aldwin CM. Long-term Outcomes of Military Service in  
21 359 Aging and the Life Course: A Positive Re-envisioning. *Gerontologist*. 2016;56(1):5-13.  
22 360 7. Duel J and Reijnen A. The long term effects of military deployment and their relation  
23 361 with the quality of life of Dutch Veterans. *Mil Behav Heal*. 2021;9(2):160-169.  
24 362 8. Pedlar D, Thompson JM, Castro CA. Military Veteran reintegration. Military-to-civilian  
25 363 transition theories and frameworks. In: Castro C, Dursun S, editors. *Military Veteran*  
26 364 *reintegration, approach, management, and assessment of military Veterans*  
27 365 *transitioning to civilian life*. San Diego: Academic Press; 2019. 257p.  
28 366 9. Veterans Support Act (NZ) 2014. [cited 2020 28 August] Available:  
29 367 <https://www.legislation.govt.nz/act/public/2014/0056/latest/whole.html>.  
30 368 10. New Zealand Government. Briefing to the Incoming Minister for Veterans. Wellington:  
31 369 New Zealand Veteran's Affairs; 2020. [cited 2020 28 August] Available from:  
32 370 <https://www.beehive.govt.nz/sites/default/files/2020-12/Veteran%20Affairs.pdf>.  
33 371 11. Royal New Zealand Returned and Services Association [internet]. [cited 2022 2  
34 372 February] Available: <https://www.rsa.org.nz/>.  
35 373 12. NoDuff. [Internet]. [cited 2022 2 February] <https://www.noduff.org/>.  
36 374 13. EuroQol Research Foundation. EQ-5D-5L User Guide [Internet]. Rotterdam: EuroQol  
37 375 Research Foundation; 2021. [cited 2022 2 February]. Available from:  
38 376 <https://euroqol.org/eq-5d-instruments/eq-5d-5l-about/>.



- 1  
2 377 14. Health Information Standards Organisation. Ethnicity data protocols. Wellington:  
3  
4 378 Ministry of Health; 2017. Standard No.: HISO 10001:2017.
- 5  
6 379 15. U.S. Department of Veterans Affairs. Using the PTSD Checklist (PCL). Veterans Affairs  
7  
8 380 National Center for PTSD; 2012.
- 9  
10 381 16. Goldberg D.P. The Detection of Psychiatric Illness by Questionnaire. Maudsley  
11  
12 382 Monograph No. 21. London: Oxford University Press; 1972.
- 13  
14 383 17. Barrera, M., Jr. and Ainlay, S.L. The structure of social support: a conceptual and  
15  
16 384 empirical analysis. *J Comm Psychol*. 1983;11(2):133-43.
- 17  
18 385 18. Bush K, Kivlahan DR, McDonnell MB et al. The AUDIT alcohol consumption questions  
19  
20 386 (AUDIT-C): an effective brief screening test for problem drinking. Ambulatory Care  
21  
22 387 Quality Improvement Project (ACQUIP). Alcohol Use Disorders Identification Test. *Arch*  
23  
24 388 *Intern Med*. 1998;158(16):1789-95.
- 25  
26 389 19. Espie CA, Kyle SD, Hames P, Gardani M et al. The Sleep Condition Indicator: a clinical  
27  
28 390 screening tool to evaluate insomnia disorder. *BMJ Open*. 2014;4(3): e004183.
- 29  
30 391 20. American Psychiatric Association. Diagnostic and Statistical Manual of Mental  
31  
32 392 Disorders (DSM-5). Fifth edition. Washington DC: American Psychiatric Association  
33  
34 393 2013. 991p.
- 35  
36 394 21. Schnurr PP, Spiro A, Vielhauer MJ, et al. Trauma in the Lives of Older Men: Findings  
37  
38 395 from the Normative Aging Study. *Journal of Clinical Geropsychology*. 2002;8(3):175-  
39  
40 396 87.
- 41  
42 397 22. Bond FW, Hayes SC, Baer RA et al. Preliminary psychometric properties of the  
43  
44 398 Acceptance and Action Questionnaire-II: a revised measure of psychological  
45  
46 399 inflexibility and experiential avoidance. *Behav Therapy*. 2011;42(4): 676-688.
- 47  
48 400 23. Sullivan T, Hansen P, Ombler F, et al. (2020) A new tool for creating personal and social  
49  
50 401 EQ-5D-5L value sets, including valuing 'dead'. *Soc Sci Med*. 2020; 246:112707.
- 51  
52 402 24. Cronbach L. Coefficient alpha and the internal structure of tests. *Psychometrika*.  
53  
54 403 1951;16:297-334.
- 55  
56 404 25. Bland J M, Altman D G. Statistics notes: Cronbach's  
57  
58 405 alpha. *BMJ*. 1997;314:572 doi:10.1136/bmj.314.7080.572
- 59  
60 406 26. Brooks SK, Greenberg N. Non-deployment factors affecting psychological wellbeing in  
407  
408 407 military personnel: literature review. *J Ment Health*. 2018;27(1):80-90.
- 409  
410 408 27. Feng Y, Parkin D, Devlin NJ. Assessing the performance of the EQ-VAS in the NHS  
411  
412 409 PROMs programme. *Qual Life Res*. 2014;23(3):977-89.

- 1  
2 410 28. Accident Compensation Corporation. Homepage [Internet] Wellington: Accident  
3 Compensation Corporation 2022 [cited 2022 Feb 16] Available from:  
4 411  
5 412 <https://www.acc.co.nz/>.  
6  
7 413 29. Repatriation Medical Authority. Statements of Principle [Internet]. Canberra ACT:  
8 Repatriation Medical Authority 2022 [cited 2022 Feb 16] Available from:  
9 414  
10 415 <http://www.rma.gov.au/sops/>.  
11  
12 416 30. Austin G, Calvert Toby, Fasi N, et al. Soldiering on only goes so far: How a qualitative  
13 study on Veteran loneliness in New Zealand influenced that support during COVID-19  
14 417 lockdown. *Journal of Military, Veteran and Family Health*. 2020;6(S2):60-69.  
15 418  
16 419 31. Richardson A, Gurung G, Samaranayaka A, et al. Risk and protective factors for post-  
17 traumatic stress among New Zealand military personnel: A cross sectional study. *PLoS*  
18 420  
19 421 *One*. 2020;15(4):e0231460.  
20  
21 422 32. Boehmer TK, Boothe VL, Flanders WD et al. Health-related quality of life of U.S. military  
22 personnel: a population-based study. *Mil Med*. 2003;168(11):941-7.  
23 423  
24 424 33. Williamson V, Diehle J, Dunn R, et al. The impact of military service on health and well-  
25 being. *Occup Med (Lond)*. 2019;69(1):64-70.  
26 425  
27 426 34. Diaz Santana MV, Eber S, Barth S, Cypel Y et al. Health-Related Quality of Life Among  
28 U.S. Veterans of Operation Enduring Freedom and Operation Iraqi Freedom-Results  
29 427 From a Population-Based Study. *Mil Med*. 2017;182(11):e1885-e91.  
30 428  
31 429 35. Newby JH, McCarroll JE, Ursano RJ, et al. Positive and negative consequences of a  
32 military deployment. *Mil Med*. 2005;170(10):815-9.  
33 430  
34 431 36. McCarthy E, DeViva JC, Norman SB, et al. Self-assessed sleep quality partially mediates  
35 the relationship between PTSD symptoms and functioning and quality of life in U.S.  
36 432 Veterans: Results from the National Health and Resilience in Veterans Study. *Psychol*  
37 433 *Trauma*. 2019;11(8):869-76.  
38 434  
39 435 37. Wolgast M. What does the Acceptance and Action Questionnaire (AAQ-II) really  
40 measure? *Behav Ther*. 2014;45(6):831-839.  
41 436  
42 437 38. Troxel WM et al. Sleep in the Military: Promoting Healthy Sleep Among U.S.  
43 Servicemembers. RAND Corporation, 2015[cited 2021 August 28]. Available from:  
44 438  
45 439 [https://www.rand.org/content/dam/rand/pubs/research\\_reports/RR700/RR739/RA](https://www.rand.org/content/dam/rand/pubs/research_reports/RR700/RR739/RAND_RR739.pdf)  
46 440 [ND\\_RR739.pdf](https://www.rand.org/content/dam/rand/pubs/research_reports/RR700/RR739/RAND_RR739.pdf).  
47  
48 441 39. Sweetman A et al. A step-by-step model for a brief behavioural treatment for  
49 insomnia in Australian general practice. *Aust J Gen Pract*. 2021;50(5):287–293.  
50 442  
51  
52  
53  
54  
55  
56  
57  
58  
59  
60

## 444 **DATA SHARING STATEMENT**

445 Data from this study is unsuitable for public deposition due to the privacy of participant data.  
446 Data are anonymised, but contain information on deployments (including location and  
447 duration), which could lead to some participants being identified. Furthermore, the  
448 participant information sheet, as required by the Southern Health and Disability Ethics  
449 Committee specifically contains the statement that 'all study data would be kept strictly  
450 confidential to the research team.' Some instruments used in the survey may be copyright.  
451 Qualified researchers may apply for data access and a copy of the survey by contacting the  
452 research team at veterans.health@otago.ac.nz and/or hdec@mh.govt.nz.

## 453 **FUNDING**

454 This work was supported by a research grant from the Ministerial Veterans Health Advisory  
455 Panel, funded through the War Pensions Medical Research Trust Fund (grant number not  
456 applicable), also by Lottery Health (grant number LHR-2017-49146) and the Royal New  
457 Zealand Returned and Services Association (grant number not applicable).

## 458 **COMPETING INTERESTS**

459 None declared.

## 460 **CONTRIBUTION**

461 All the authors have made substantial contributions to the conception or design of the work;  
462 or the acquisition, analysis, or interpretation of data for the work; AND  
463 Drafting the work or revising it critically for important intellectual content; AND  
464 Final approval of the version to be published; AND  
465 Agreement to be accountable for all aspects of the work in ensuring that questions related to  
466 the accuracy or integrity of any part of the work are appropriately investigated and resolved.

### 467 **Specific responsibilities**

468 **Investigation:** Amy Richardson, Emma H. Wyeth, Sarah Derrett, Daniel Shepherd, David  
469 McBride.

470 **Methodology:** Amy Richardson, Ari Samaranayaka, Dianne Gardner, Emma H. Wyeth, Sarah  
471 Derrett, David McBride, Daniel Shepherd.

472 **Project administration:** Amy Richardson.

473 **Resources:** Brandon de Graaf.

474 **Software:** Brandon de Graaf.

1  
2 475 **Supervision:** Ari Samaranayaka.  
3

4 476 **Validation:** Amy Richardson.  
5

6 477 **Visualization:** Amy Richardson.  
7

8 478 **Writing – original draft:** David McBride. AS, DG, EHW, SD and DS contributed to the re-writes  
9 and final draft.  
10

## 11 480 **ACKNOWLEDGEMENTS**

12  
13  
14 481 We would like to thank Shane Harvey for his input into the initial design, Aidan Smith, previous  
15  
16 482 research advisor to the NZDF, for steering us through the consents process, also the members  
17  
18 483 of our steering group: COL Clare Bennett (NZDF); Ms Marti Eller (New Zealand Veterans  
19  
20 484 Affairs); Mark Compain, Danny Nelson and Richard Terrill (RSA); and NoDuff representatives  
21  
22 485 Aaron Wood and Lars Millar.

23 486 Finally, a thank you to the New Zealand Veterans who took the time and effort to complete a  
24  
25 487 rather tedious questionnaire. Kia Kaha.

26 488 Figure 1 Caption.

27  
28 489 **The proportion of Veterans reporting ‘any problem’ with each of the EQ-5D-5L dimension**  
29  
30 490 **scores compared to the NZ population normative proportions**  
31

32 491

33  
34 492

35  
36 493  
37  
38  
39  
40  
41  
42  
43  
44  
45  
46  
47  
48  
49  
50  
51  
52  
53  
54  
55  
56  
57  
58  
59  
60

1  
2  
3  
4  
5  
6  
7  
8  
9  
10  
11  
12  
13  
14  
15  
16  
17  
18  
19  
20  
21  
22  
23  
24  
25  
26  
27  
28  
29  
30  
31  
32  
33  
34  
35  
36  
37  
38  
39  
40  
41  
42  
43  
44  
45  
46  
47  
48  
49  
50  
51  
52  
53  
54  
55  
56  
57  
58  
59  
60



The proportion of Veterans reporting 'any problem' with each of the EQ-5D-5L dimension scores compared to the NZ population normative proportions

86x65mm (300 x 300 DPI)

**Supplementary Table: Number of participants and EQ-VAS scores according to sample characteristics**

| <b>Exposure variable</b>       | <b>N (%)</b> | <b>Mean (SD)</b> |
|--------------------------------|--------------|------------------|
| <b>All</b>                     | 1767         | 74.4 (17.1)      |
| <b>Age group (years)</b>       |              |                  |
| 20-29                          | 136 (7.7)    | 77.7 (14.4)      |
| 30-39                          | 328 (18.6)   | 77.0 (16.2)      |
| 40-49                          | 438 (24.8)   | 76.1 (14.6)      |
| 50-59                          | 350 (19.8)   | 74.8 (16.6)      |
| 60-69                          | 285 (16.1)   | 71.4 (19.8)      |
| 70-79                          | 175 (9.9)    | 69.4 (19.4)      |
| 80+                            | 50 (2.8)     | 66.2 (20.3)      |
| Missing                        | 5 (0.3)      | 61.2 (22.1)      |
| <b>Gender</b>                  |              |                  |
| Female                         | 220 (12.5)   | 75.0 (16.9)      |
| Male                           | 1520 (86.0)  | 74.4 (17.2)      |
| Missing                        | 27 (1.5)     | 70.3 (17.2)      |
| <b>Ethnicity (prioritised)</b> |              |                  |
| NZ European                    | 1382 (78.2)  | 74.4 (17.1)      |
| Māori                          | 245 (13.9)   | 75.6 (16.1)      |
| Other                          | 140 (7.9)    | 71.5 (19.3)      |
| <b>Service years</b>           |              |                  |
| 0-9                            | 339 (19.2)   | 69.9 (19.7)      |
| 10-19                          | 478 (27.1)   | 74.5 (17.9)      |
| 20-29                          | 530 (30.0)   | 75.3 (15.9)      |
| 30-39                          | 254 (14.4)   | 76.3 (14.6)      |
| 40+                            | 69 (3.9)     | 75.4 (16.4)      |
| Missing                        | 97 (5.5)     | 78.8 (14.2)      |
| <b>Deployment (ever)</b>       |              |                  |
| No                             | 288 (16.3)   | 69.5 (19.9)      |
| Yes                            | 1458 (82.5)  | 75.3 (16.4)      |
| Missing                        | 21 (1.2)     | 75.6 (14.6)      |
| <b>GHQ12 Score</b>             |              |                  |
| 0-9                            | 652 (36.9)   | 82.0 (12.6)      |
| 10-19                          | 972 (55.0)   | 72.3 (16.0)      |
| 20-29                          | 123 (7.0)    | 54.3 (20.3)      |
| 30+                            | 18 (1.0)     | 46.2 (24.4)      |
| Missing                        | 2 (0.1)      | -                |

\*sub-scores not used in multivariable models.

## Supplementary table contd.

| <b>Social support full score</b>   |      |                    |
|------------------------------------|------|--------------------|
| 24-29                              | 0    | 0 -                |
| 30-39                              | 3    | (0.2) 66.7 (15.3)  |
| 40-49                              | 15   | (0.8) 44.5 (22.5)  |
| 50-59                              | 97   | (5.5) 62.4 (21.8)  |
| 60-69                              | 351  | (19.9) 69.0 (18.2) |
| 70-79                              | 643  | (36.4) 75.1 (15.0) |
| 80-89                              | 409  | (23.1) 78.0 (15.0) |
| 90-96                              | 235  | (13.3) 81.9 (13.9) |
| Missing                            | 14   | (0.8) 58.1 (25.6)  |
| <b>Social support sub-scores</b>   |      |                    |
| <b>Attachment*</b>                 |      |                    |
| 4-7                                | 51   | (3.5) 61.4 (23.4)  |
| 8-11                               | 516  | (29.2) 68.7 (18.0) |
| 12-16                              | 1193 | (67.5) 77.5 (15.5) |
| Missing                            | 7    | (0.4) 61.0 (19.7)  |
| <b>Social integration*</b>         |      |                    |
| 4-7                                | 20   | (1.1) 56.2 (25.1)  |
| 8-11                               | 429  | (24.3) 67.1 (19.4) |
| 12-16                              | 1309 | (74.8) 77.1 (15.2) |
| Missing                            | 9    | (0.5) 58.7 (21.5)  |
| <b>Reassurance of worth*</b>       |      |                    |
| 4-7                                | 37   | (2.1) 59.1 (19.5)  |
| 8-11                               | 504  | (28.5) 69.0 (19.1) |
| 12-16                              | 1215 | (68.8) 77.2 (15.2) |
| Missing                            | 11   | (0.6) 62.0 (24.9)  |
| <b>Reliable Alliance*</b>          |      |                    |
| 4-7                                | 20   | (1.1) 49.6 (22.2)  |
| 8-11                               | 251  | (14.2) 66.9 (20.1) |
| 12-16                              | 1489 | (84.3) 76.0 (15.9) |
| Missing                            | 7    | (0.4) 61.0 (19.7)  |
| <b>Guidance sub-score*</b>         |      |                    |
| 4-7                                | 36   | (2.0) 59.2 (22.2)  |
| 8-11                               | 387  | (21.9) 68.7 (18.9) |
| 12-16                              | 1337 | (75.7) 76.6 (15.7) |
| Missing                            | 7    | (0.4) 54.6 (21.6)  |
| <b>Opportunity for nurturance*</b> |      |                    |
| 4-7                                | 29   | (1.6) 69.3 (18.9)  |
| 8-11                               | 413  | (23.4) 71.9 (18.8) |
| 12-16                              | 1316 | (74.5) 75.4 (16.4) |
| Missing                            | 9    | (0.5) 58.7 (21.5)  |

## Supplementary table, contd.

**Psychological flexibility score  
(AAQii score).**

|         |     |        |             |
|---------|-----|--------|-------------|
| 10-19   | 5   | (0.3)  | 23.2 (13.8) |
| 20-29   | 40  | (2.3)  | 49.1 (22.1) |
| 30-39   | 147 | (8.3)  | 63.0 (18.6) |
| 40-49   | 43  | (24.7) | 68.5 (16.8) |
| 50-59   | 664 | (37.6) | 77.1 (13.9) |
| 60-70   | 457 | (25.9) | 82.5 (13.5) |
| Missing | 1   | (1.0)  | 69.6 (20.5) |

**Sleep Condition Indicator (SCI score)**

|         |     |        |             |
|---------|-----|--------|-------------|
| 0 to <2 | 67  | (3.8)  | 51.2 (22.3) |
| 2 to <4 | 264 | (14.9) | 62.2 (19.5) |
| 4 to <6 | 646 | (36.6) | 74.3 (14.6) |
| 6 to <8 | 384 | (21.7) | 77.6 (14.2) |
| 8 to 10 | 386 | (21.8) | 83.5 (12.2) |
| Missing | 20  | (1.1)  | 77.3 (12.8) |

**AUDIT-C score**

|               |     |        |             |
|---------------|-----|--------|-------------|
| Non-hazardous | 776 | (43.9) | 74.0 (17.4) |
| Hazardous     | 915 | (51.8) | 74.6 (16.9) |
| Missing       | 76  | (4.3)  | 75.0 (17.0) |

**Brief Trauma Questionnaire  
(DSM-IV criteria)**

|             |      |        |             |
|-------------|------|--------|-------------|
| Not exposed | 544  | (30.8) | 78.3 (15.1) |
| Exposed     | 1210 | (68.5) | 72.5 (17.8) |
| Missing     | 13   | (0.7)  | 80.6 (8.1)  |



STROBE Statement—Checklist of items that should be included in reports of *cross-sectional studies*

|                              | Item No | Recommendation                                                                                                                                                                                                                                                                                                                                                                                                                                                                              |
|------------------------------|---------|---------------------------------------------------------------------------------------------------------------------------------------------------------------------------------------------------------------------------------------------------------------------------------------------------------------------------------------------------------------------------------------------------------------------------------------------------------------------------------------------|
| <b>Title and abstract</b>    | 1       | Indicate the study's design with a commonly used term in the title or the abstract.<br><b>Yes, a cross sectional study, p1 title.</b><br>(b) Provide in the abstract an informative and balanced summary of what was done and what was found <b>Background, results and conclusions, p 1</b>                                                                                                                                                                                                |
| <b>Introduction</b>          |         |                                                                                                                                                                                                                                                                                                                                                                                                                                                                                             |
| Background/rationale         | 2       | Explain the scientific background and rationale for the investigation being reported<br><b>Introduction p2.</b>                                                                                                                                                                                                                                                                                                                                                                             |
| Objectives                   | 3       | State specific objectives, including any prespecified hypotheses <b>p2, lines 59 and 60</b>                                                                                                                                                                                                                                                                                                                                                                                                 |
| <b>Methods</b>               |         |                                                                                                                                                                                                                                                                                                                                                                                                                                                                                             |
| Study design                 | 4       | Present key elements of study design early in the paper <b>p2 line 62 to page 5 line 145</b>                                                                                                                                                                                                                                                                                                                                                                                                |
| Setting                      | 5       | Describe the setting, locations, and relevant dates, including periods of recruitment, exposure, follow-up, and data collection <b>Participants, page2 line 63- page 3 line 83.</b>                                                                                                                                                                                                                                                                                                         |
| Participants                 | 6       | (a) Give the eligibility criteria, and the sources and methods of selection of participants <b>page 2 line 64 to page 3, line 68.</b>                                                                                                                                                                                                                                                                                                                                                       |
| Variables                    | 7       | Clearly define all outcomes, exposures, predictors, potential confounders, and effect modifiers. Give diagnostic criteria, if applicable <b>Questionnaire, pp 3-5.</b>                                                                                                                                                                                                                                                                                                                      |
| Data sources/<br>measurement | 8*      | For each variable of interest, give sources of data and details of methods of assessment (measurement). Describe comparability of assessment methods if there is more than one group <b>as above</b>                                                                                                                                                                                                                                                                                        |
| Bias                         | 9       | Describe any efforts to address potential sources of bias <b>Methods, page 3. Lines 76-83.</b>                                                                                                                                                                                                                                                                                                                                                                                              |
| Study size                   | 10      | Explain how the study size was arrived at <b>p5 line 137</b>                                                                                                                                                                                                                                                                                                                                                                                                                                |
| Quantitative variables       | 11      | Explain how quantitative variables were handled in the analyses. If applicable, describe which groupings were chosen and why Cases defined through the <b>Multivariable logistic regression with the EQ-Visual analogue scale as the outcome measure, p5 lines 131-136</b>                                                                                                                                                                                                                  |
| Statistical methods          | 12      | (a) Describe all statistical methods, including those used to control for confounding <b>Backward elimination process p5 lines 134-135</b><br>(b) Describe any methods used to examine subgroups and interactions <b>By multivariable logistic regression, p5 as above</b><br>(c) Explain how missing data were addressed <b>p4 lines 122-125</b><br>(d) If applicable, describe analytical methods taking account of sampling strategy<br>N/A<br>(e) Describe any sensitivity analyses N/A |
| <b>Results</b>               |         |                                                                                                                                                                                                                                                                                                                                                                                                                                                                                             |
| Participants                 | 13*     | (a) Report numbers of individuals at each stage of study—eg numbers potentially eligible, examined for eligibility, confirmed eligible, included in the study, completing follow-up, and analysed <b>Potentially eligible lines 68-73 p 3</b><br>(b) Give reasons for non-participation at each stage N/A<br>(c) Consider use of a flow diagram N/A                                                                                                                                         |

|                          |     |                                                                                                                                                                                                                                                                                                                                                                                                                                                                                                                                                                             |
|--------------------------|-----|-----------------------------------------------------------------------------------------------------------------------------------------------------------------------------------------------------------------------------------------------------------------------------------------------------------------------------------------------------------------------------------------------------------------------------------------------------------------------------------------------------------------------------------------------------------------------------|
| Descriptive data         | 14* | (a) Give characteristics of study participants (eg demographic, clinical, social) and information on exposures and potential confounders <b>page 5 et seq, table 1</b><br>(b) Indicate number of participants with missing data for each variable of interest ' <b>n used</b> ' columns <b>tables 2 and 3.</b>                                                                                                                                                                                                                                                              |
| Outcome data             | 15* | Report numbers of outcome events or summary measures <b>as per tables</b>                                                                                                                                                                                                                                                                                                                                                                                                                                                                                                   |
| Main results             | 16  | (a) Give unadjusted estimates and, if applicable, confounder-adjusted estimates and their precision (eg, 95% confidence interval). Make clear which confounders were adjusted for and why they were included <b>Tables, adjusted for age, sex, service years and deployment status.</b><br>(b) Report category boundaries when continuous variables were categorized. <b>Independent variables, p 3 and 4, EQ-VAS is a continuous scale.</b><br>(c) If relevant, consider translating estimates of relative risk into absolute risk for a meaningful time period <b>N/A</b> |
| Other analyses           | 17  | Report other analyses done—eg analyses of subgroups and interactions, and sensitivity analyses <b>N/A</b>                                                                                                                                                                                                                                                                                                                                                                                                                                                                   |
| <b>Discussion</b>        |     |                                                                                                                                                                                                                                                                                                                                                                                                                                                                                                                                                                             |
| Key results              | 18  | Summarise key results with reference to study objectives <b>Discussion, p11 first para</b>                                                                                                                                                                                                                                                                                                                                                                                                                                                                                  |
| Limitations              | 19  | Discuss limitations of the study, taking into account sources of potential bias or imprecision. Discuss both direction and magnitude of any potential bias <b>Discussion lines 215 et seq.</b>                                                                                                                                                                                                                                                                                                                                                                              |
| Interpretation           | 20  | Give a cautious overall interpretation of results considering objectives, limitations, multiplicity of analyses, results from similar studies, and other relevant evidence <b>Discussion, p12 lines 230 et seq.</b>                                                                                                                                                                                                                                                                                                                                                         |
| Generalisability         | 21  | Discuss the generalisability (external validity) of the study results <b>p17, line 215 et seq.</b>                                                                                                                                                                                                                                                                                                                                                                                                                                                                          |
| <b>Other information</b> |     |                                                                                                                                                                                                                                                                                                                                                                                                                                                                                                                                                                             |
| Funding                  | 22  | Give the source of funding and the role of the funders for the present study and, if applicable, for the original study on which the present article is based <b>Funding, p18</b>                                                                                                                                                                                                                                                                                                                                                                                           |

\*Give information separately for exposed and unexposed groups.

**Note:** An Explanation and Elaboration article discusses each checklist item and gives methodological background and published examples of transparent reporting. The STROBE checklist is best used in conjunction with this article (freely available on the Web sites of PLoS Medicine at <http://www.plosmedicine.org/>, Annals of Internal Medicine at <http://www.annals.org/>, and Epidemiology at <http://www.epidem.com/>). Information on the STROBE Initiative is available at [www.strobe-statement.org](http://www.strobe-statement.org).
