# Supplementary material for: Factors associated with self-reported health among New Zealand military veterans: a cross-sectional study
Source: PubMed Central journal article supplement — BMJ Open. 2022 May 25;12(5):e056916. doi: 10.1136/bmjopen-2021-056916 (PMC9134175; doi:10.1136/bmjopen-2021-056916), 2022-05-25
Supplement: bmjopen-2021-056916supp001.pdf [file bmjopen-2021-056916supp001.pdf]

**Supplementary Table: Number of participants and EQ-VAS scores according to sample characteristics**

| <b>Exposure variable</b>       | <b>N (%)</b> | <b>Mean (SD)</b> |
|--------------------------------|--------------|------------------|
| <b>All</b>                     | 1767         | 74.4 (17.1)      |
| <b>Age group (years)</b>       |              |                  |
| 20-29                          | 136 (7.7)    | 77.7 (14.4)      |
| 30-39                          | 328 (18.6)   | 77.0 (16.2)      |
| 40-49                          | 438 (24.8)   | 76.1 (14.6)      |
| 50-59                          | 350 (19.8)   | 74.8 (16.6)      |
| 60-69                          | 285 (16.1)   | 71.4 (19.8)      |
| 70-79                          | 175 (9.9)    | 69.4 (19.4)      |
| 80+                            | 50 (2.8)     | 66.2 (20.3)      |
| Missing                        | 5 (0.3)      | 61.2 (22.1)      |
| <b>Gender</b>                  |              |                  |
| Female                         | 220 (12.5)   | 75.0 (16.9)      |
| Male                           | 1520 (86.0)  | 74.4 (17.2)      |
| Missing                        | 27 (1.5)     | 70.3 (17.2)      |
| <b>Ethnicity (prioritised)</b> |              |                  |
| NZ European                    | 1382 (78.2)  | 74.4 (17.1)      |
| Māori                          | 245 (13.9)   | 75.6 (16.1)      |
| Other                          | 140 (7.9)    | 71.5 (19.3)      |
| <b>Service years</b>           |              |                  |
| 0-9                            | 339 (19.2)   | 69.9 (19.7)      |
| 10-19                          | 478 (27.1)   | 74.5 (17.9)      |
| 20-29                          | 530 (30.0)   | 75.3 (15.9)      |
| 30-39                          | 254 (14.4)   | 76.3 (14.6)      |
| 40+                            | 69 (3.9)     | 75.4 (16.4)      |
| Missing                        | 97 (5.5)     | 78.8 (14.2)      |
| <b>Deployment (ever)</b>       |              |                  |
| No                             | 288 (16.3)   | 69.5 (19.9)      |
| Yes                            | 1458 (82.5)  | 75.3 (16.4)      |
| Missing                        | 21 (1.2)     | 75.6 (14.6)      |
| <b>GHQ12 Score</b>             |              |                  |
| 0-9                            | 652 (36.9)   | 82.0 (12.6)      |
| 10-19                          | 972 (55.0)   | 72.3 (16.0)      |
| 20-29                          | 123 (7.0)    | 54.3 (20.3)      |
| 30+                            | 18 (1.0)     | 46.2 (24.4)      |
| Missing                        | 2 (0.1)      | -                |

\*sub-scores not used in multivariable models.

## Supplementary table contd.

| <b>Social support full score</b>   |      |                    |
|------------------------------------|------|--------------------|
| 24-29                              | 0    | 0 -                |
| 30-39                              | 3    | (0.2) 66.7 (15.3)  |
| 40-49                              | 15   | (0.8) 44.5 (22.5)  |
| 50-59                              | 97   | (5.5) 62.4 (21.8)  |
| 60-69                              | 351  | (19.9) 69.0 (18.2) |
| 70-79                              | 643  | (36.4) 75.1 (15.0) |
| 80-89                              | 409  | (23.1) 78.0 (15.0) |
| 90-96                              | 235  | (13.3) 81.9 (13.9) |
| Missing                            | 14   | (0.8) 58.1 (25.6)  |
| <b>Social support sub-scores</b>   |      |                    |
| <b>Attachment*</b>                 |      |                    |
| 4-7                                | 51   | (3.5) 61.4 (23.4)  |
| 8-11                               | 516  | (29.2) 68.7 (18.0) |
| 12-16                              | 1193 | (67.5) 77.5 (15.5) |
| Missing                            | 7    | (0.4) 61.0 (19.7)  |
| <b>Social integration*</b>         |      |                    |
| 4-7                                | 20   | (1.1) 56.2 (25.1)  |
| 8-11                               | 429  | (24.3) 67.1 (19.4) |
| 12-16                              | 1309 | (74.8) 77.1 (15.2) |
| Missing                            | 9    | (0.5) 58.7 (21.5)  |
| <b>Reassurance of worth*</b>       |      |                    |
| 4-7                                | 37   | (2.1) 59.1 (19.5)  |
| 8-11                               | 504  | (28.5) 69.0 (19.1) |
| 12-16                              | 1215 | (68.8) 77.2 (15.2) |
| Missing                            | 11   | (0.6) 62.0 (24.9)  |
| <b>Reliable Alliance*</b>          |      |                    |
| 4-7                                | 20   | (1.1) 49.6 (22.2)  |
| 8-11                               | 251  | (14.2) 66.9 (20.1) |
| 12-16                              | 1489 | (84.3) 76.0 (15.9) |
| Missing                            | 7    | (0.4) 61.0 (19.7)  |
| <b>Guidance sub-score*</b>         |      |                    |
| 4-7                                | 36   | (2.0) 59.2 (22.2)  |
| 8-11                               | 387  | (21.9) 68.7 (18.9) |
| 12-16                              | 1337 | (75.7) 76.6 (15.7) |
| Missing                            | 7    | (0.4) 54.6 (21.6)  |
| <b>Opportunity for nurturance*</b> |      |                    |
| 4-7                                | 29   | (1.6) 69.3 (18.9)  |
| 8-11                               | 413  | (23.4) 71.9 (18.8) |
| 12-16                              | 1316 | (74.5) 75.4 (16.4) |
| Missing                            | 9    | (0.5) 58.7 (21.5)  |

## Supplementary table, contd.

**Psychological flexibility score  
(AAQii score).**

|         |            |             |
|---------|------------|-------------|
| 10-19   | 5 (0.3)    | 23.2 (13.8) |
| 20-29   | 40 (2.3)   | 49.1 (22.1) |
| 30-39   | 147 (8.3)  | 63.0 (18.6) |
| 40-49   | 43 (24.7)  | 68.5 (16.8) |
| 50-59   | 664 (37.6) | 77.1 (13.9) |
| 60-70   | 457 (25.9) | 82.5 (13.5) |
| Missing | 1 (1.0)    | 69.6 (20.5) |

**Sleep Condition Indicator (SCI score)**

|         |            |             |
|---------|------------|-------------|
| 0 to <2 | 67 (3.8)   | 51.2 (22.3) |
| 2 to <4 | 264 (14.9) | 62.2 (19.5) |
| 4 to <6 | 646 (36.6) | 74.3 (14.6) |
| 6 to <8 | 384 (21.7) | 77.6 (14.2) |
| 8 to 10 | 386 (21.8) | 83.5 (12.2) |
| Missing | 20 (1.1)   | 77.3 (12.8) |

**AUDIT-C score**

|               |            |             |
|---------------|------------|-------------|
| Non-hazardous | 776 (43.9) | 74.0 (17.4) |
| Hazardous     | 915 (51.8) | 74.6 (16.9) |
| Missing       | 76 (4.3)   | 75.0 (17.0) |

**Brief Trauma Questionnaire  
(DSM-IV criteria)**

|             |             |             |
|-------------|-------------|-------------|
| Not exposed | 544 (30.8)  | 78.3 (15.1) |
| Exposed     | 1210 (68.5) | 72.5 (17.8) |
| Missing     | 13 (0.7)    | 80.6 (8.1)  |
